# Supplementary material
Source: publisher figshare collection journal article supplement (https://acs.figshare.com/ndownloader/files/5778915)

## SUPPLEMENTARY MATERIAL

# SYNTHESIS OF BICYCLIC ORTHO ESTERS BY EPOXY ESTER REARRANGEMENTS AND STUDY OF THEIR RING OPENING REACTIONS

Peter Wipf\* and Diana C. Aslan

Department of Chemistry, University of Pittsburgh, Pittsburgh, Pennsylvania 15260

Experimental protocols and spectral characterization for **11b**, **11c**, **12b**, **12c**, **29a**, **29b**, **31a**, and **31b**;  $^1\text{H}$  and  $^{13}\text{C}$  NMR spectra for all new compounds.

**4-(1,2-Dimethyl-1-phenethyl-propoxy)-2-methyl-butane-1,2-diol (11b).** According to the procedure described for **11a**, oily **11b** (0.21 g, 72%) was obtained as a 1:1 mixture of diastereomers from acetal **9** (0.25 g, 1.0 mmol) and  $i$ PrMgBr (2 M solution in Et<sub>2</sub>O, 2.0 mL): IR (neat) 3468, 2933, 1718, 1069, 699 cm<sup>-1</sup>; <sup>1</sup>H NMR  $\delta$  7.33-7.19 (m, 5 H), 3.88 (bs, 1 H), 3.69-3.61 (m, 1 H), 3.61-3.58 (m, 1 H), 3.55-3.40 (m, 2 H), 2.90 (b, 1 H), 2.65-2.59 (m, 2 H), 2.00-1.92 (m, 2 H), 1.83-1.76 (m, 2 H), 1.72-1.63 (m, 1 H), 1.24 (s, 3 H), 1.15 (s, 3 H), 0.96-0.90 (m, 6 H); <sup>13</sup>C NMR  $\delta$  142.7, 128.6, 128.4, 125.9, 80.3, 72.8, 70.3, 57.4, 38.1, 38.0, 37.4, 33.7, 29.8, 24.5, 24.4, 19.0, 17.7, 17.2; HRMS (EI) calcd. for C<sub>15</sub>H<sub>23</sub>O<sub>3</sub> (M-C<sub>3</sub>H<sub>7</sub>) 251.1654, found 251.1647.

**2-Methyl-4-(1-methyl-1,3-diphenyl-propoxy)-butane-1,2-diol (11c).** According to the procedure described for **11a**, oily **11c** (0.21 g, 63%) was obtained from acetal **9** (0.25 g, 1.0 mmol) and C<sub>6</sub>H<sub>5</sub>MgBr (3 M solution in Et<sub>2</sub>O, 1.3 mL): IR (neat) 3450, 2928, 1719, 1453 cm<sup>-1</sup>; <sup>1</sup>H NMR  $\delta$  7.45-7.13 (m, 10 H), 3.96-3.73 (m, 2 H), 3.24-3.07 (m, 3 H), 2.93 (bs, 1 H), 2.57-2.50 (m, 2 H), 2.16 (t,  $J$  = 8.5 Hz, 2 H), 1.94-1.86 (m, 2 H), 1.71-1.66 (m, 1 H), 1.66 (s, 3 H), 1.28 (s, 3 H); <sup>13</sup>C NMR  $\delta$  144.5, 142.2, 128.3, 128.2, 128.2, 127.0, 126.0, 125.7, 78.7, 73.0, 69.1, 59.3, 44.3, 39.8, 30.3, 24.7, 24.5, 23.5; HRMS (EI) calcd. for C<sub>21</sub>H<sub>29</sub>O<sub>3</sub> 329.2117, found 329.2122.

**3,4-Dimethyl-1-phenyl-pentan-3-ol (12b).** According to the procedure described for compound **12a**, oily **12b** (33 mg, 85%) was obtained from **11b** (59 mg, 0.20 mmol), pyridinium chlorochromate (0.34 g, 1.6 mmol, 8 eq.), 4Å molecular sieves (0.30 g) and 3.6 mL (9 eq.) of 0.5 M solution of piperidinium acetate in benzene: IR (neat) 3462, 2963, 1455, 1373 cm<sup>-1</sup>; <sup>1</sup>H NMR  $\delta$  7.33-7.20 (m, 5 H), 2.75-2.68 (m, 2 H), 1.81-1.75 (m, 4 H), 1.19 (s, 3 H), 0.97 (d,  $J$  = 6.9 Hz, 3 H), 0.96 (d,  $J$  = 6.9 Hz, 3 H); <sup>13</sup>C NMR  $\delta$  142.9, 128.4, 125.8, 74.8, 41.9, 37.1, 30.0, 23.1, 17.6, 17.0; HRMS (EI) calcd. for C<sub>13</sub>H<sub>18</sub> (M-H<sub>2</sub>O) 174.1409, found 174.1408.

**2,4-Diphenyl-butan-2-ol (12c).** According to the procedure described for compound **12a**, oily **12c** (36 mg, 80%) was obtained from **11c** (66 mg, 0.20 mmol), pyridinium chlorochromate (0.34 g, 1.6 mmol, 8 eq.), 4Å molecular sieves (0.30 g) and 3.6 mL (9 eq.) of 0.5 M solution of piperidinium acetate in benzene: IR (neat) 3448, 2930, 1495, 1446, 699 cm<sup>-1</sup>; <sup>1</sup>H NMR  $\delta$  7.52-7.49 (m, 2 H), 7.40 (t,  $J$  = 7.7 Hz, 2 H), 7.31-7.25 (m, 3 H), 7.18-7.13 (m, 3 H), 2.74-2.56 (m, 1 H), 2.52-2.40 (m, 1 H), 2.19-2.12 (m, 2 H), 1.80 (bs, 1 H), 1.64 (s, 3 H); <sup>13</sup>C NMR  $\delta$  147.6, 142.3, 128.5, 128.4, 126.8, 125.8, 124.9, 74.8, 46.0, 30.6, 30.5; HRMS (EI) calcd. for C<sub>16</sub>H<sub>18</sub>O 226.1358, found 226.1353.

**(2,5,5-Trimethyl-2-phenethyl-[1,3]dioxan-4-yl)-methanol (29a).** According to the procedure described for **9**, oily **29a** (0.22 g, 84%) was obtained from ortho ester **15** (0.25 g, 1.0 mmol) and  $\text{CH}_3\text{MgBr}$  (3 M solution in  $\text{Et}_2\text{O}$ , 1.0 mL, 3.0 mmol, 3 eq.): IR (neat) 3440, 2958, 2871, 1378, 1251, 1131, 1036  $\text{cm}^{-1}$ ;  $^1\text{H}$  NMR  $\delta$  7.34-7.19 (m, 5 H), 3.76-3.58 (m, 4 H), 3.26 (d,  $J$  = 11.4 Hz, 1 H), 2.64 (t,  $J$  = 8.6 Hz, 2 H), 2.22-2.08 (m, 2 H), 1.98 (dd,  $J$  = 6.9, 10.7 Hz, 1 H), 1.48 (s, 3 H), 1.05 (s, 3 H), 0.80 (s, 3 H);  $^{13}\text{C}$  NMR  $\delta$  141.9, 128.6, 128.3, 126.0, 100.3, 77.8, 71.7, 61.9, 32.9, 31.4, 30.7, 26.8, 21.7, 18.9; HRMS (EI) calcd. for  $\text{C}_{16}\text{H}_{25}\text{O}_2$  249.1855, found 249.1839.

**(5,5-Dimethyl-2-phenethyl-2-phenyl-[1,3]dioxan-4-yl)-methanol (29b).** According to the procedure described for **9**, oily **29b** (0.26 g, 79%) was obtained as a 3:1 mixture of diastereomers from ortho ester **15** (0.25 g, 1.0 mmol) and  $\text{C}_6\text{H}_5\text{MgBr}$  (3 M solution in  $\text{Et}_2\text{O}$ , 1.0 mL, 3.0 mmol, 3 eq.). Major isomer: IR (neat) 3426, 2958, 1149, 1124, 1027  $\text{cm}^{-1}$ ;  $^1\text{H}$  NMR  $\delta$  7.63 (d,  $J$  = 8.0 Hz, 2 H), 7.47-7.32 (m, 3 H), 7.28-7.24 (m, 3 H), 7.11 (d,  $J$  = 7.5 Hz, 2 H), 3.74-3.64 (m, 3 H), 3.37 (d,  $J$  = 11.0 Hz, 1 H), 2.85-2.78 (m, 1 H), 2.55-2.48 (m, 1 H), 2.44-2.35 (m, 2 H), 2.11-2.07 (m, 1 H), 1.99 (bs, 1 H), 0.97 (s, 3 H), 0.93 (s, 3 H);  $^{13}\text{C}$  NMR  $\delta$  142.5, 141.3, 128.7, 128.4, 128.3, 128.1, 128.0, 127.3, 125.6, 101.3, 78.0, 71.8, 61.9, 34.9, 32.5, 30.1, 22.6, 19.2; HRMS (EI) calcd. for  $\text{C}_{21}\text{H}_{26}\text{O}_3$  326.1882, found 326.1875.

**(2-Methyl-2-phenethyl-hexahydro-benzo[1,3]dioxin-8a-yl)-methanol (31a).** According to the procedure described for **9**, oily **31a** (0.17 g, 57%) was obtained from ortho ester **16** (0.27 g, 1.0 mmol) and  $\text{CH}_3\text{MgBr}$  (3 M solution in  $\text{Et}_2\text{O}$ , 1.0 mL, 3.0 mmol, 3 eq.): IR (neat) 3399, 2933, 1040  $\text{cm}^{-1}$ ;  $^1\text{H}$  NMR  $\delta$  7.33-7.17 (m, 5 H), 4.02 (dd,  $J$  = 4.6, 11.6 Hz, 1 H), 3.89 (dd,  $J$  = 5.5, 12.0 Hz, 1 H), 3.74 (dd,  $J$  = 6.5, 11.7 Hz, 1 H), 3.41 (dd,  $J$  = 5.3, 6.2 Hz, 1 H), 2.81 (t,  $J$  = 8.6 Hz, 2 H), 2.06-1.31 (m, 12 H), 1.49 (s, 3 H);  $^{13}\text{C}$  NMR  $\delta$  142.5, 128.4, 125.8, 99.2, 75.3, 67.4, 61.0, 43.8, 34.1, 32.3, 30.3, 26.1, 25.8, 22.8, 22.4; HRMS (EI) calcd. for  $\text{C}_{18}\text{H}_{26}\text{O}_3$  290.1882, found 290.1880.

**3-Phenyl-propionic acid 2-oxo-cyclohexylmethyl ester (31b).** According to the procedure described for **9**, **31b** (0.24 g, 68%) was obtained from ortho ester **16** (0.27 g, 1.0 mmol) and  $\text{C}_6\text{H}_5\text{MgBr}$  (3 M solution in  $\text{Et}_2\text{O}$ , 1.0 mL, 3.0 mmol, 3 eq.) as a colorless solid: Mp. 100-101 °C (hexanes); IR (neat) 3083, 2939, 1447, 1032  $\text{cm}^{-1}$ ;  $^1\text{H}$  NMR  $\delta$  7.53-7.50 (m, 2 H), 7.41-7.15 (m, 8 H), 4.19 (dd,  $J$  = 3.6, 7.8 Hz, 1 H), 3.66 (dd,  $J$  = 3.8, 8.1 Hz, 1 H), 3.31, 3.17 (AB of ABX,  $J_{AB}$  = 11.7 Hz,  $J_{AX}$  = 4.5 Hz,  $J_{BX}$  = 8.7 Hz, 2 H), 2.90 (dt,  $J$  = 4.8, 13.2 Hz, 1 H), 2.67 (dt,  $J$  = 4.5, 12.9 Hz, 1 H), 2.16-1.93 (m, 4 H),

1.78-1.28 (m, 8 H);  $^{13}\text{C}$  NMR  $\delta$  144.8, 142.4, 128.5, 128.3, 127.8, 125.6, 99.8, 75.3, 66.7, 65.9, 62.7, 48.2, 34.1, 32.6, 30.0, 25.8, 24.3, 21.5, 15.3; HRMS (EI) calcd. for  $\text{C}_{23}\text{H}_{28}\text{O}_3$  226.1358, found 226.1353.

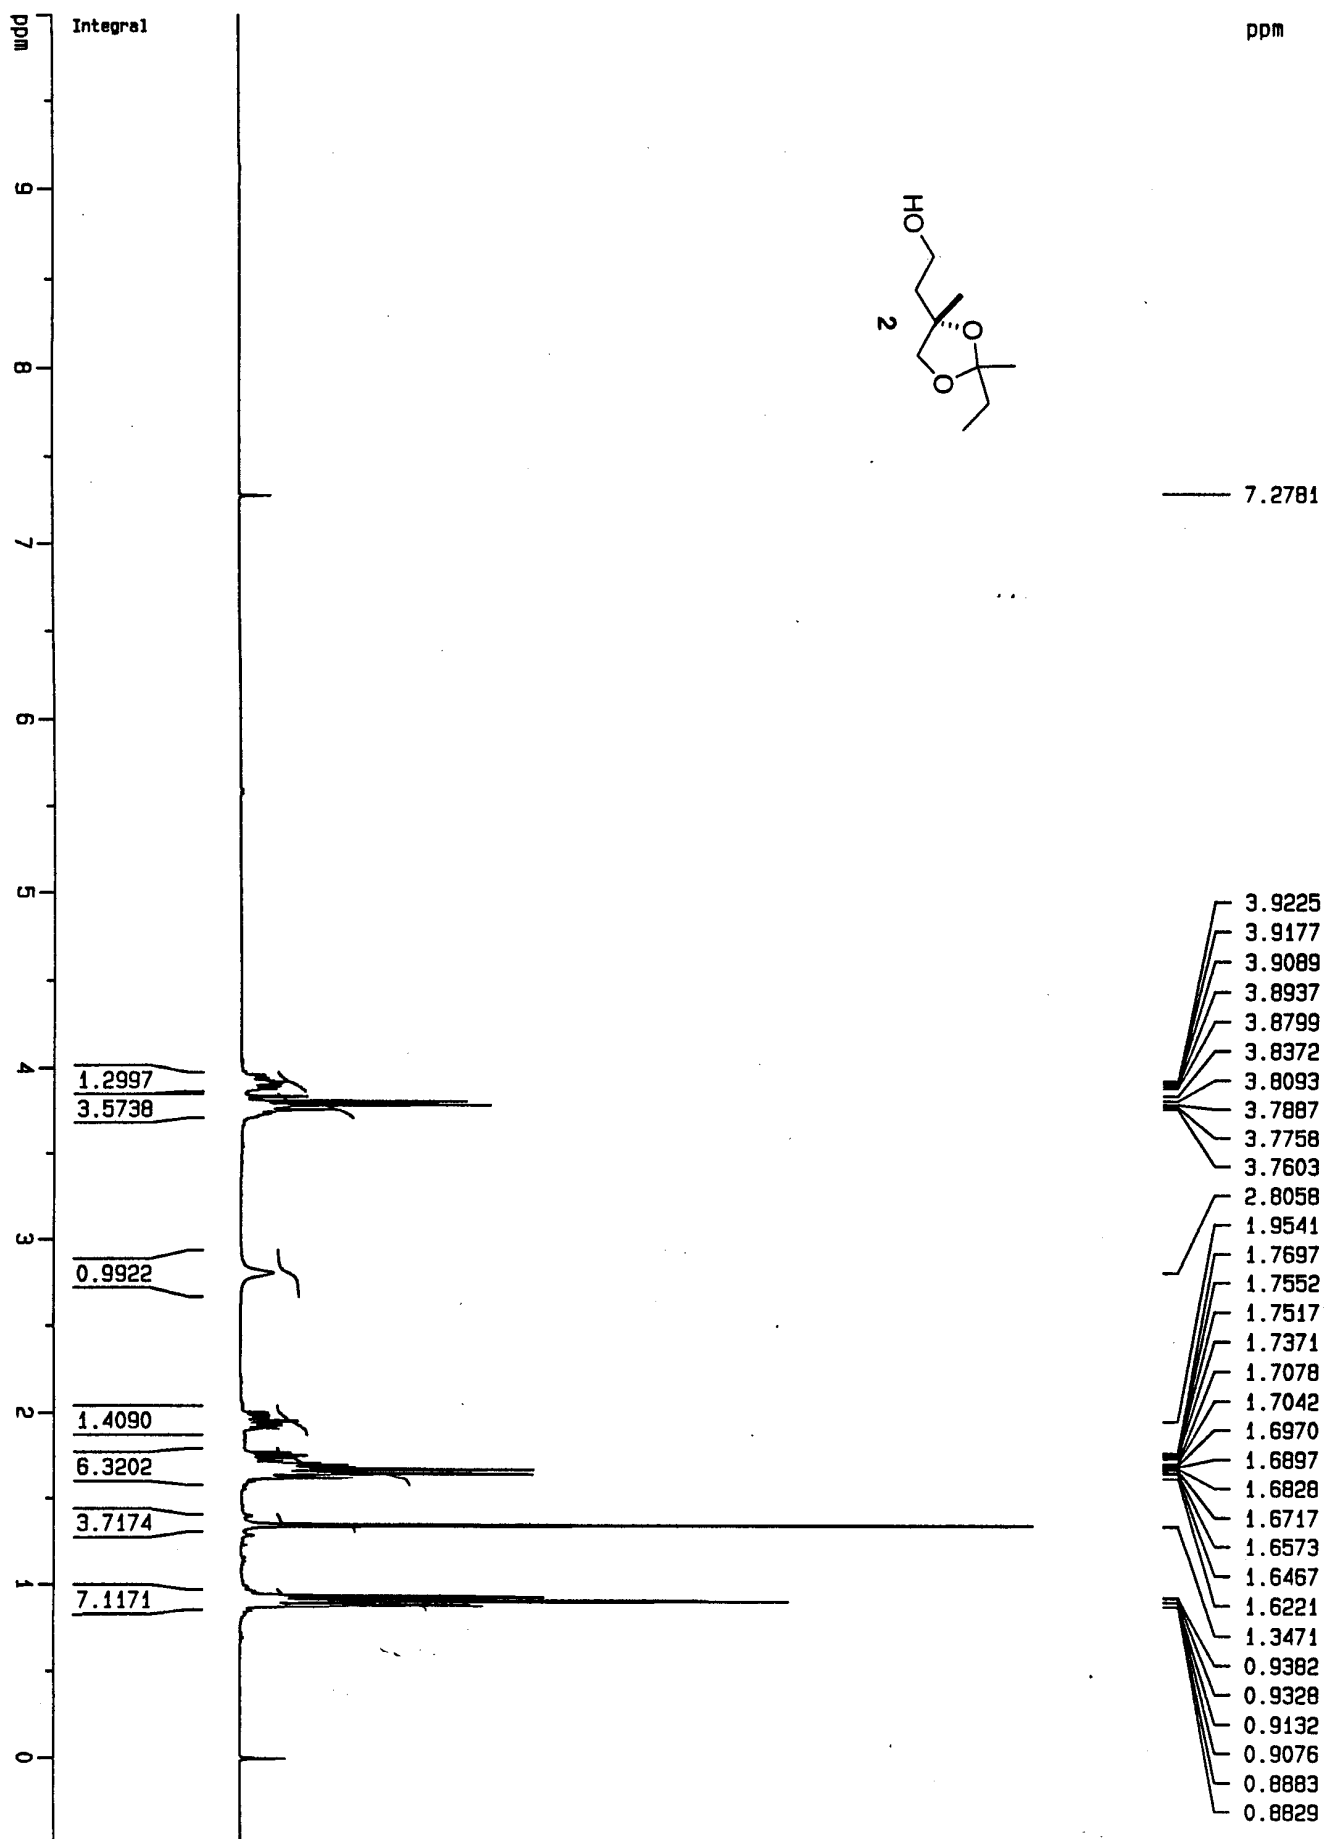

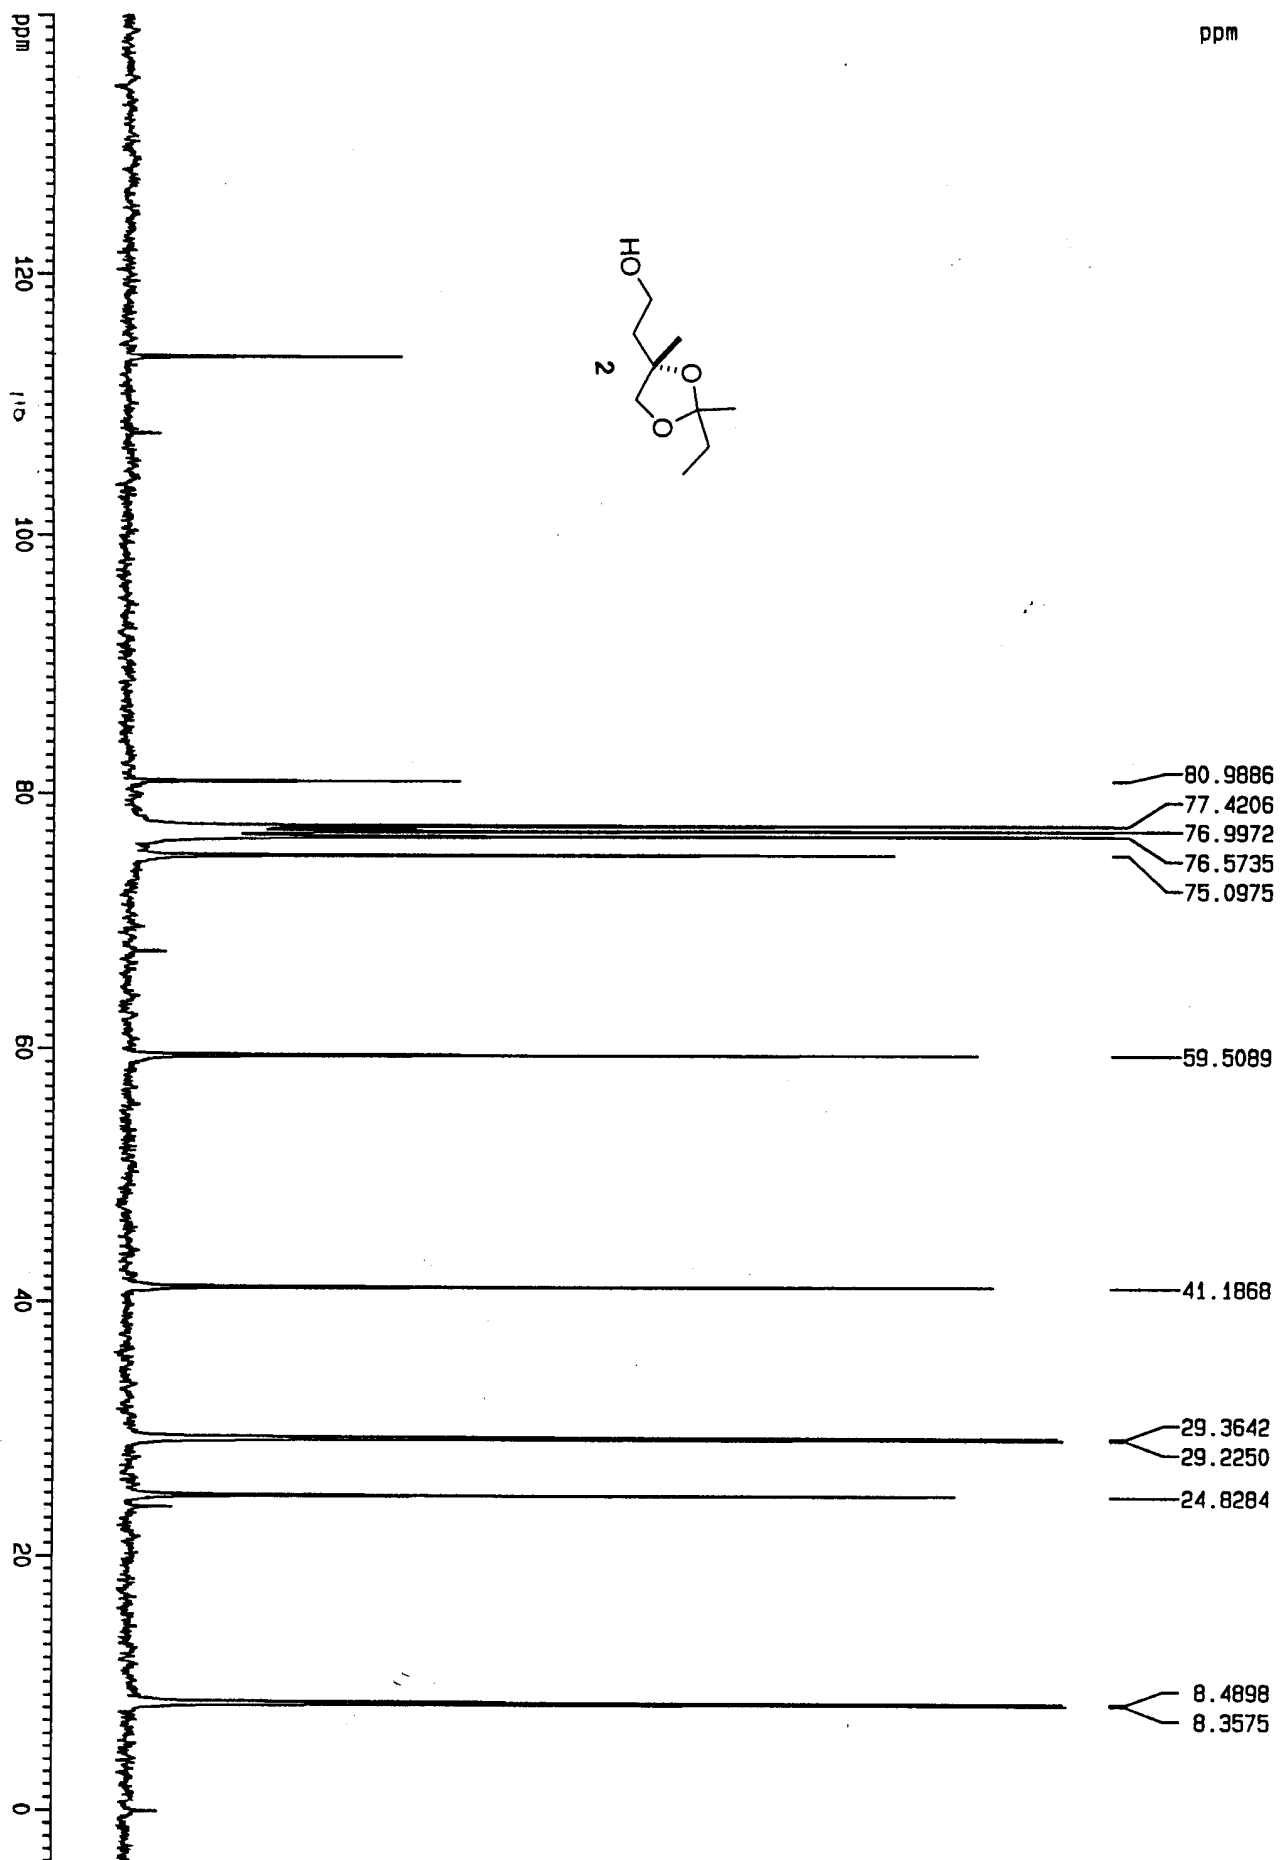

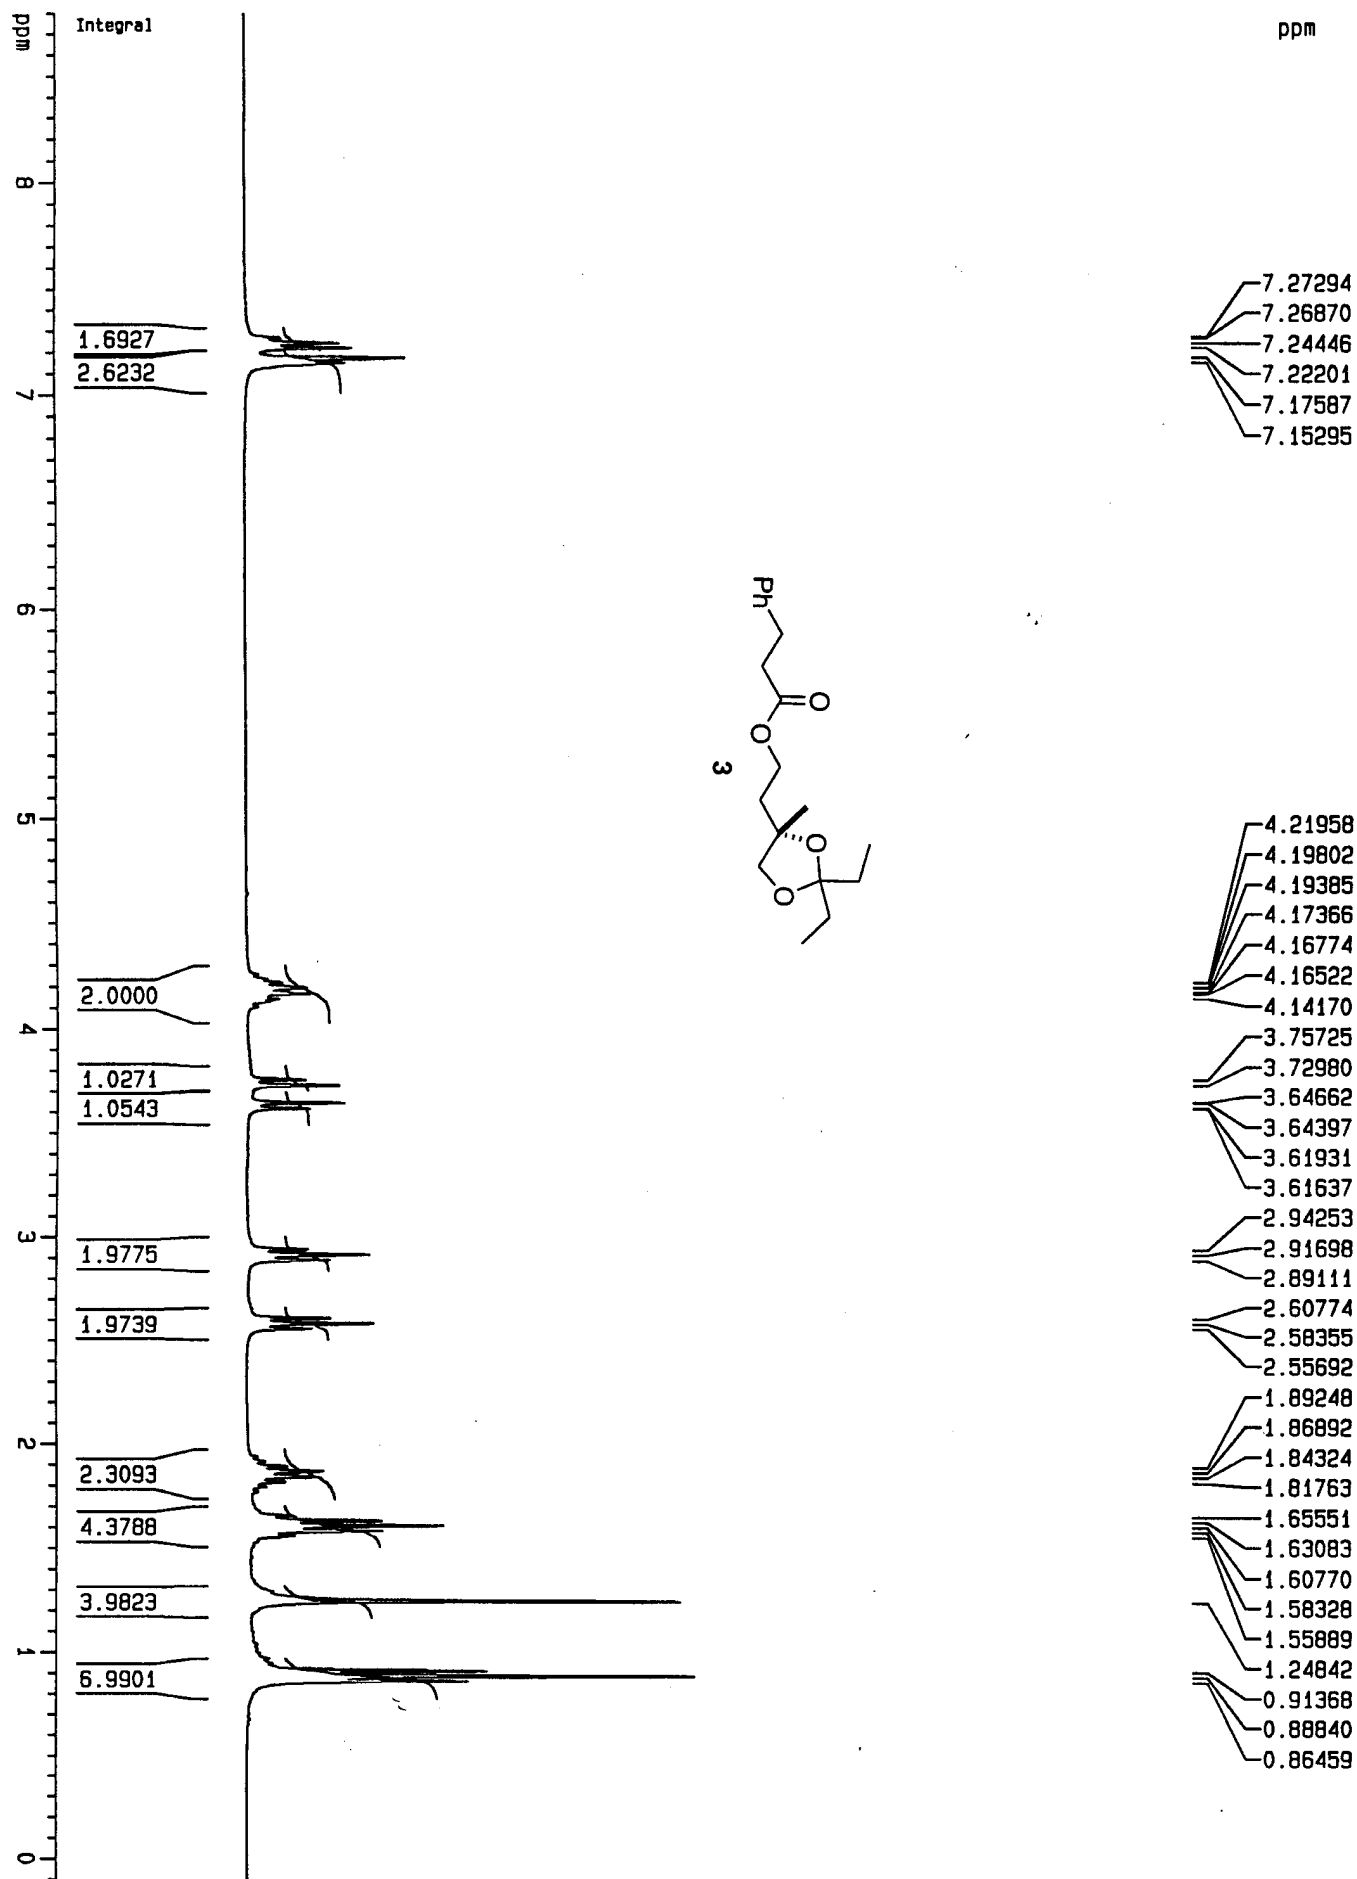

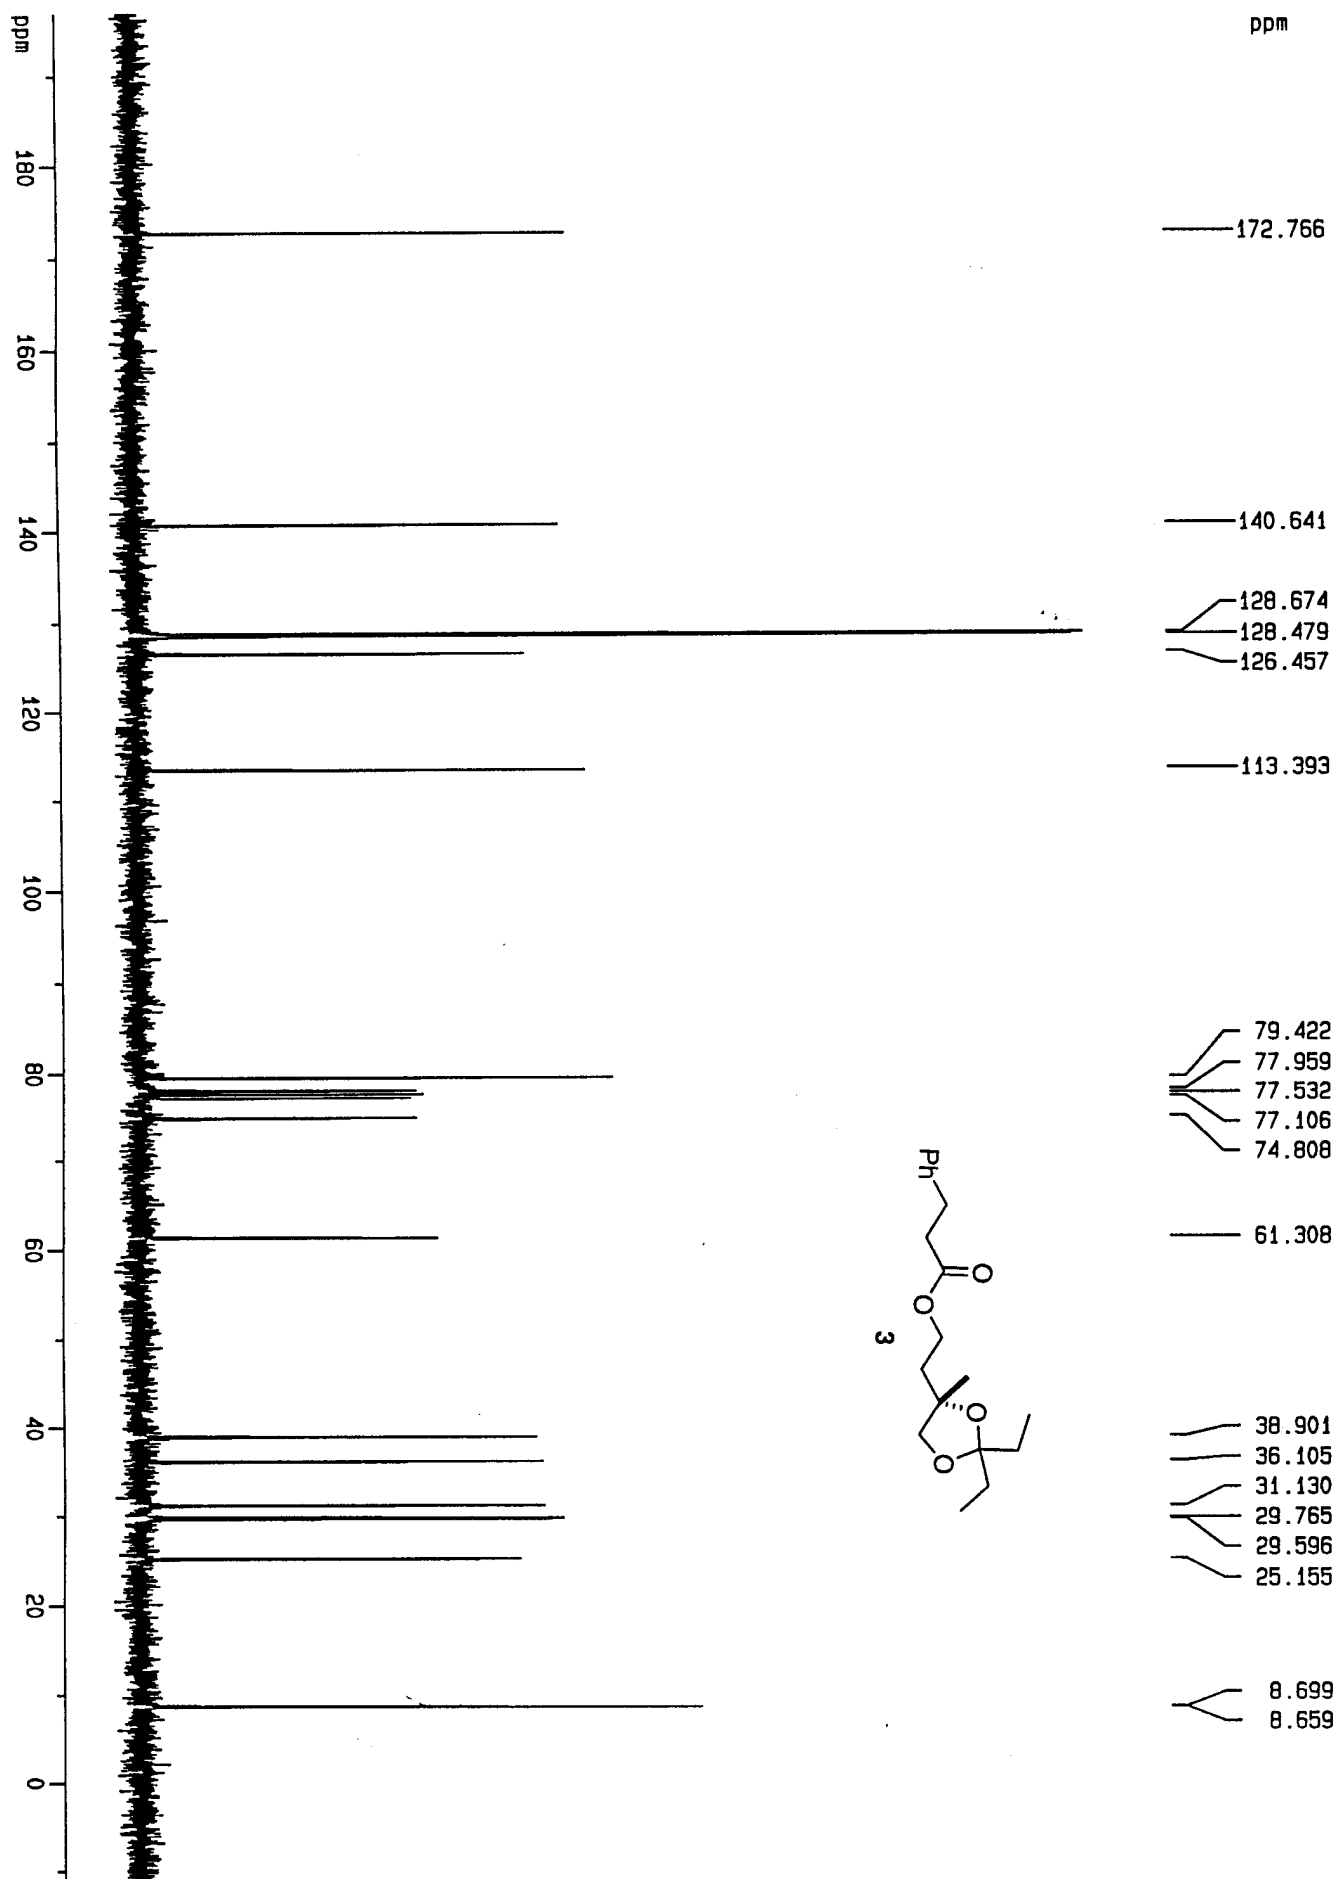



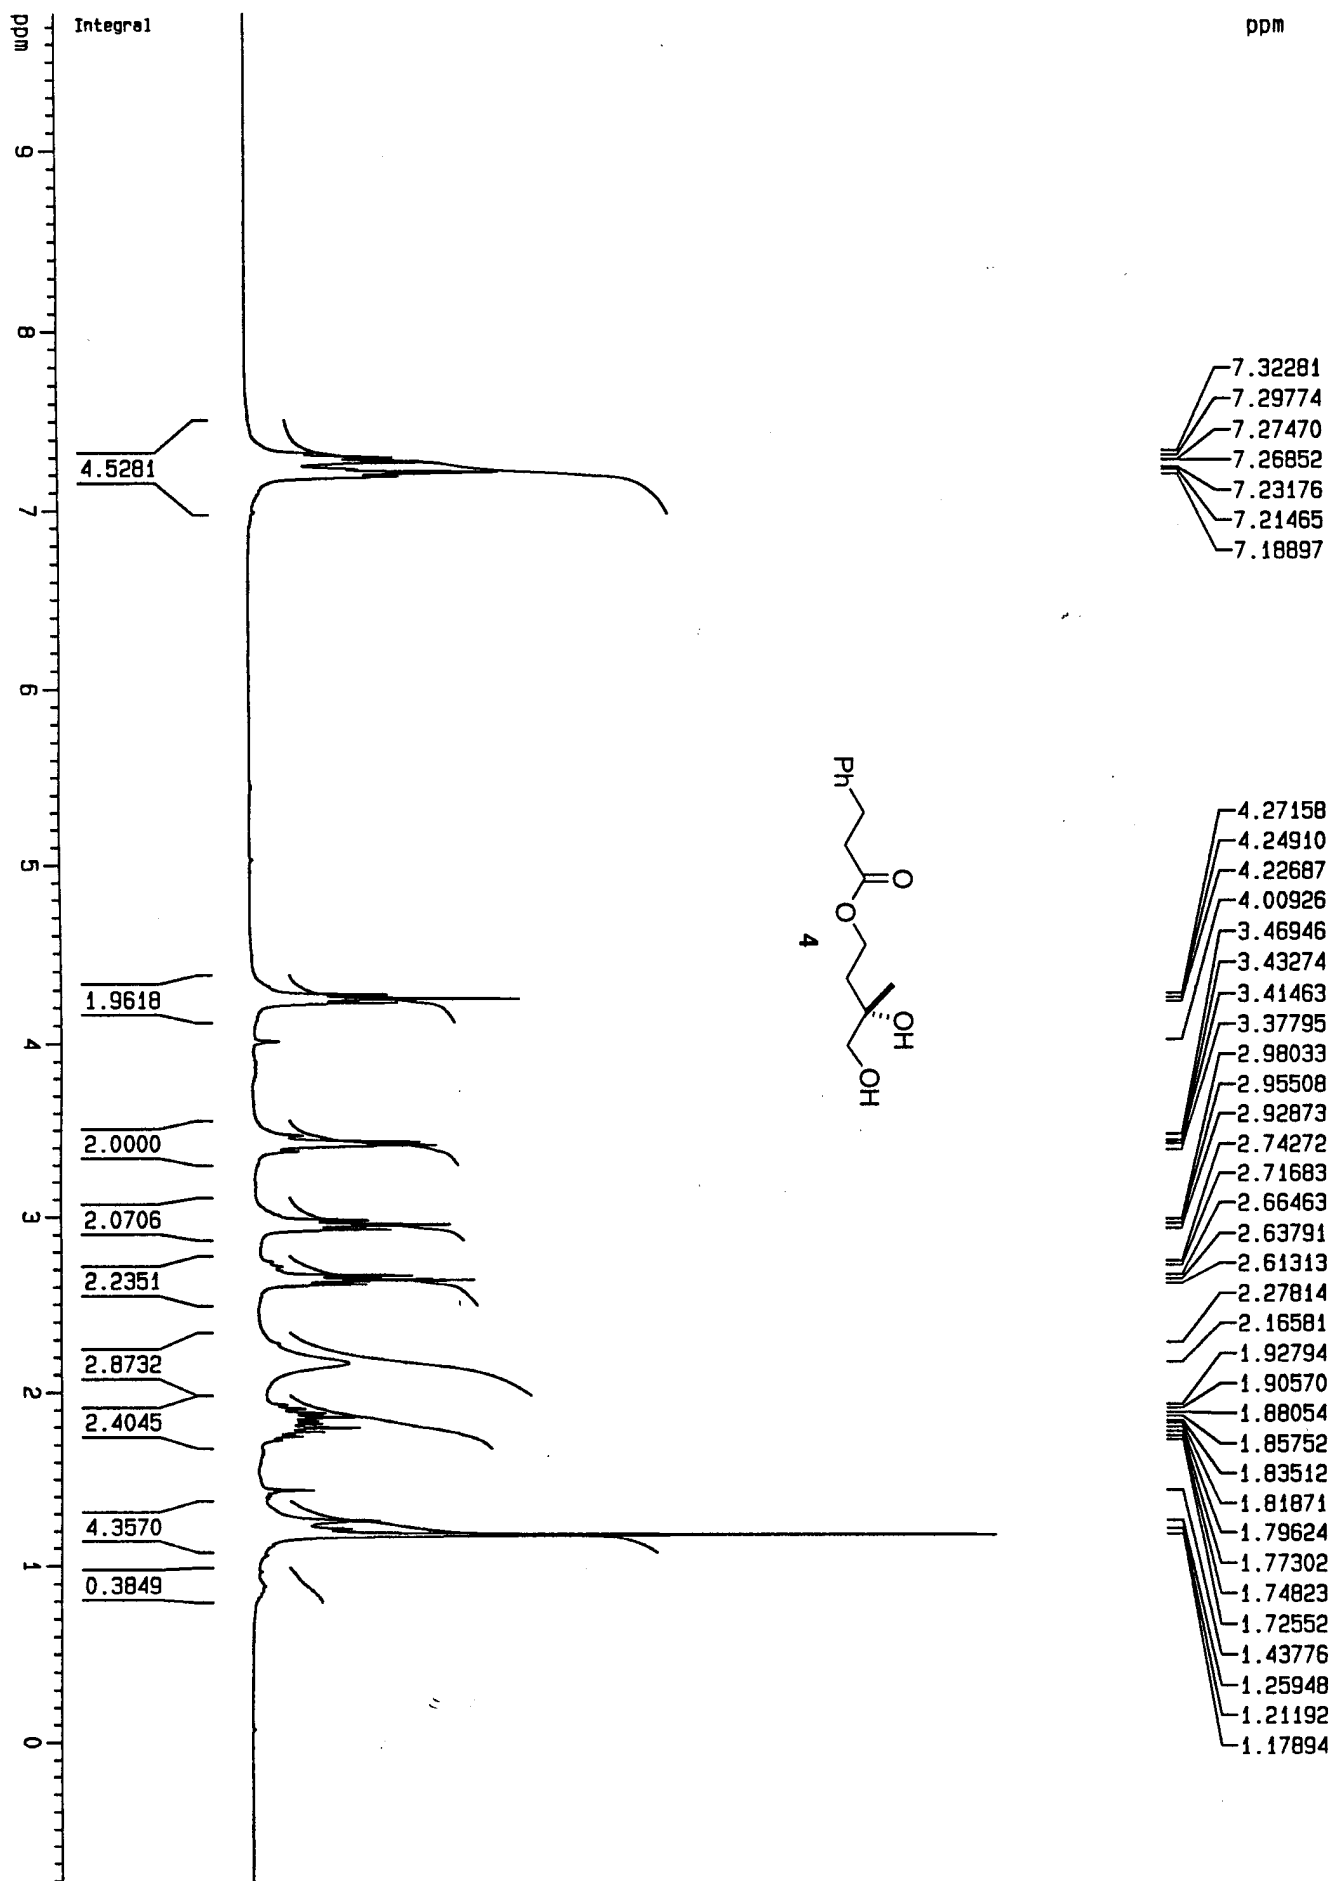

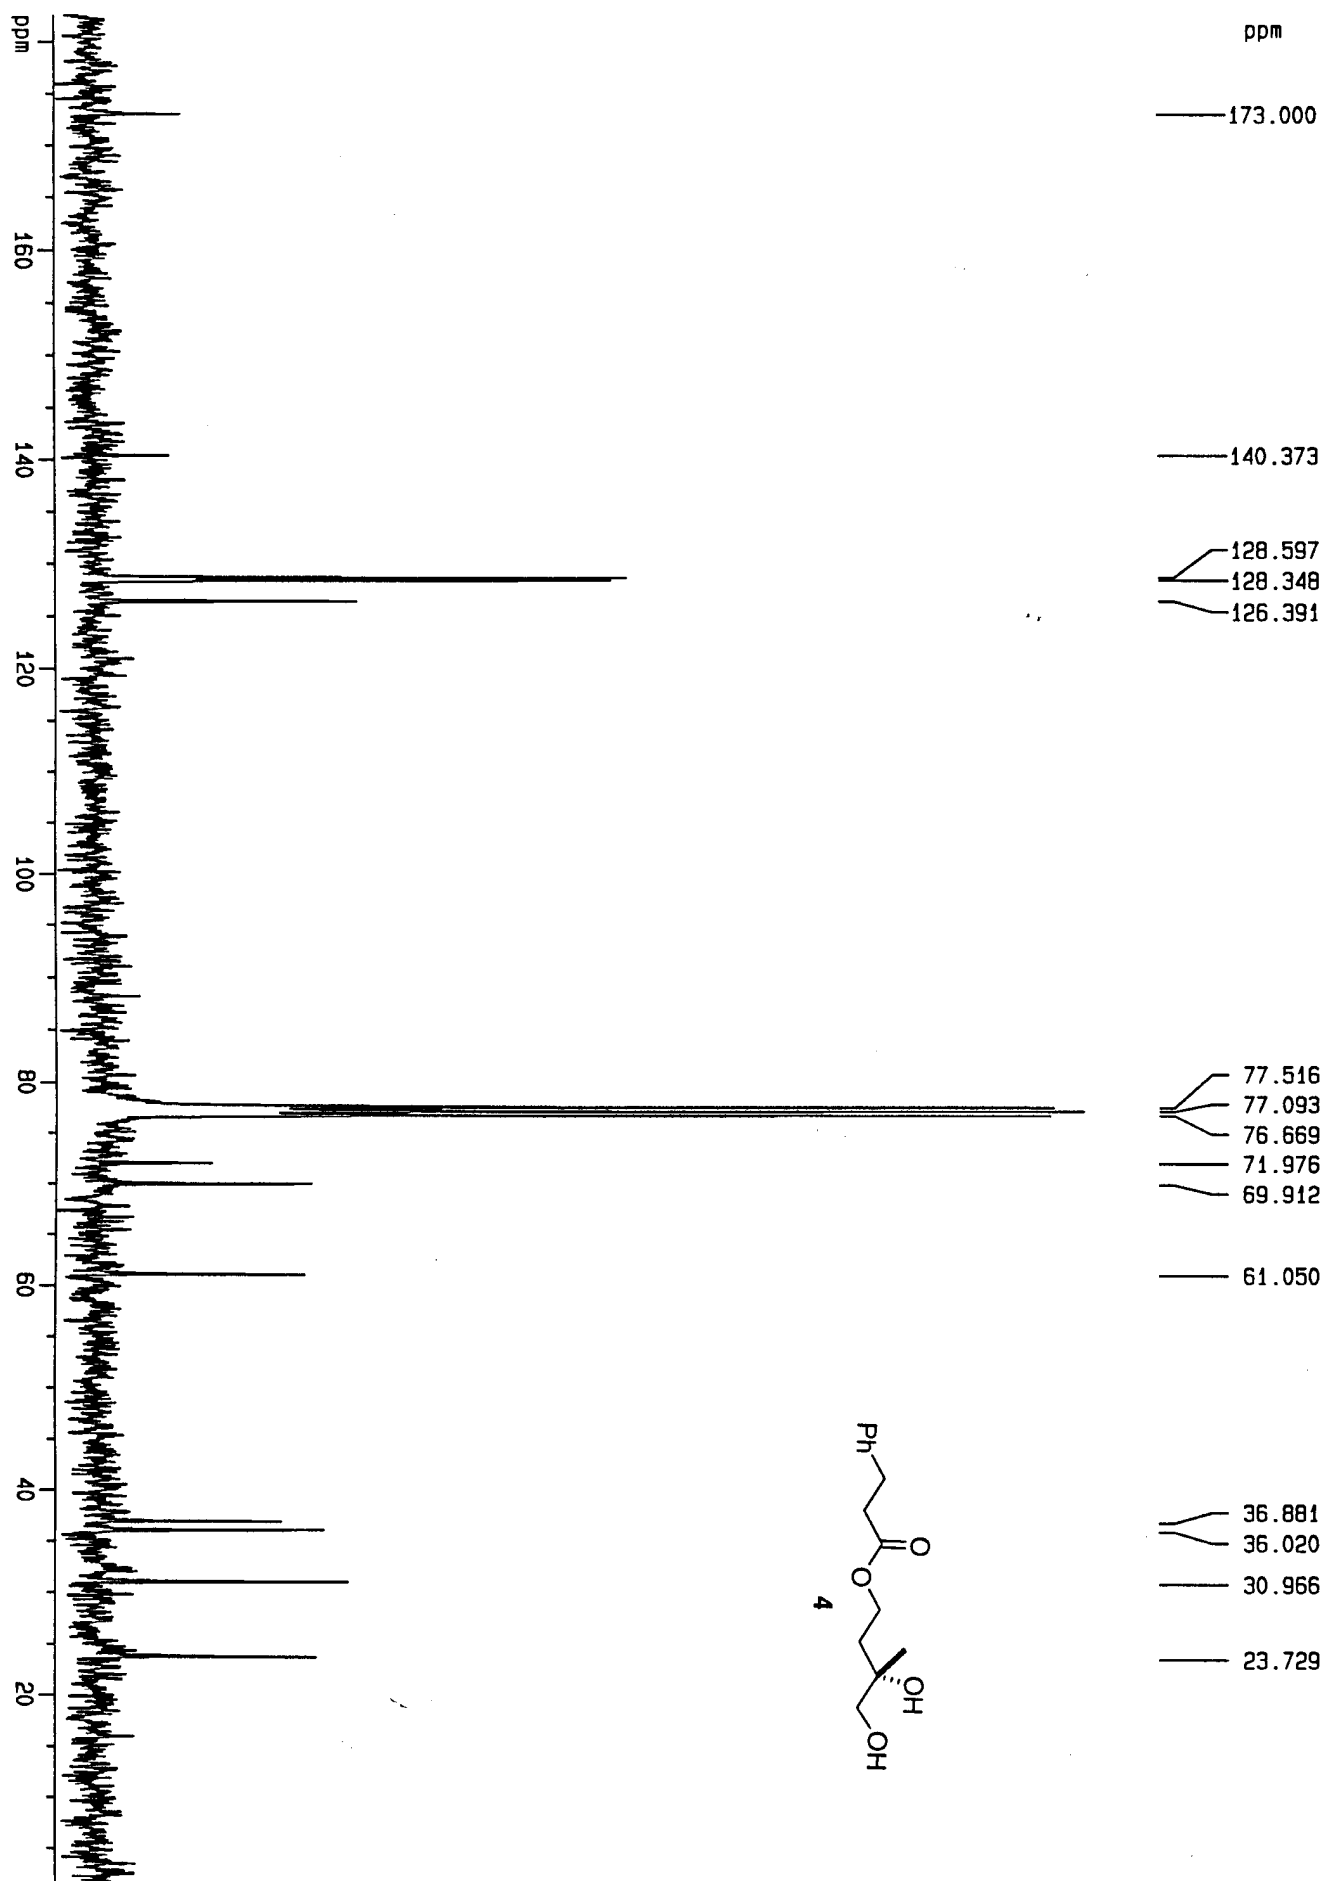

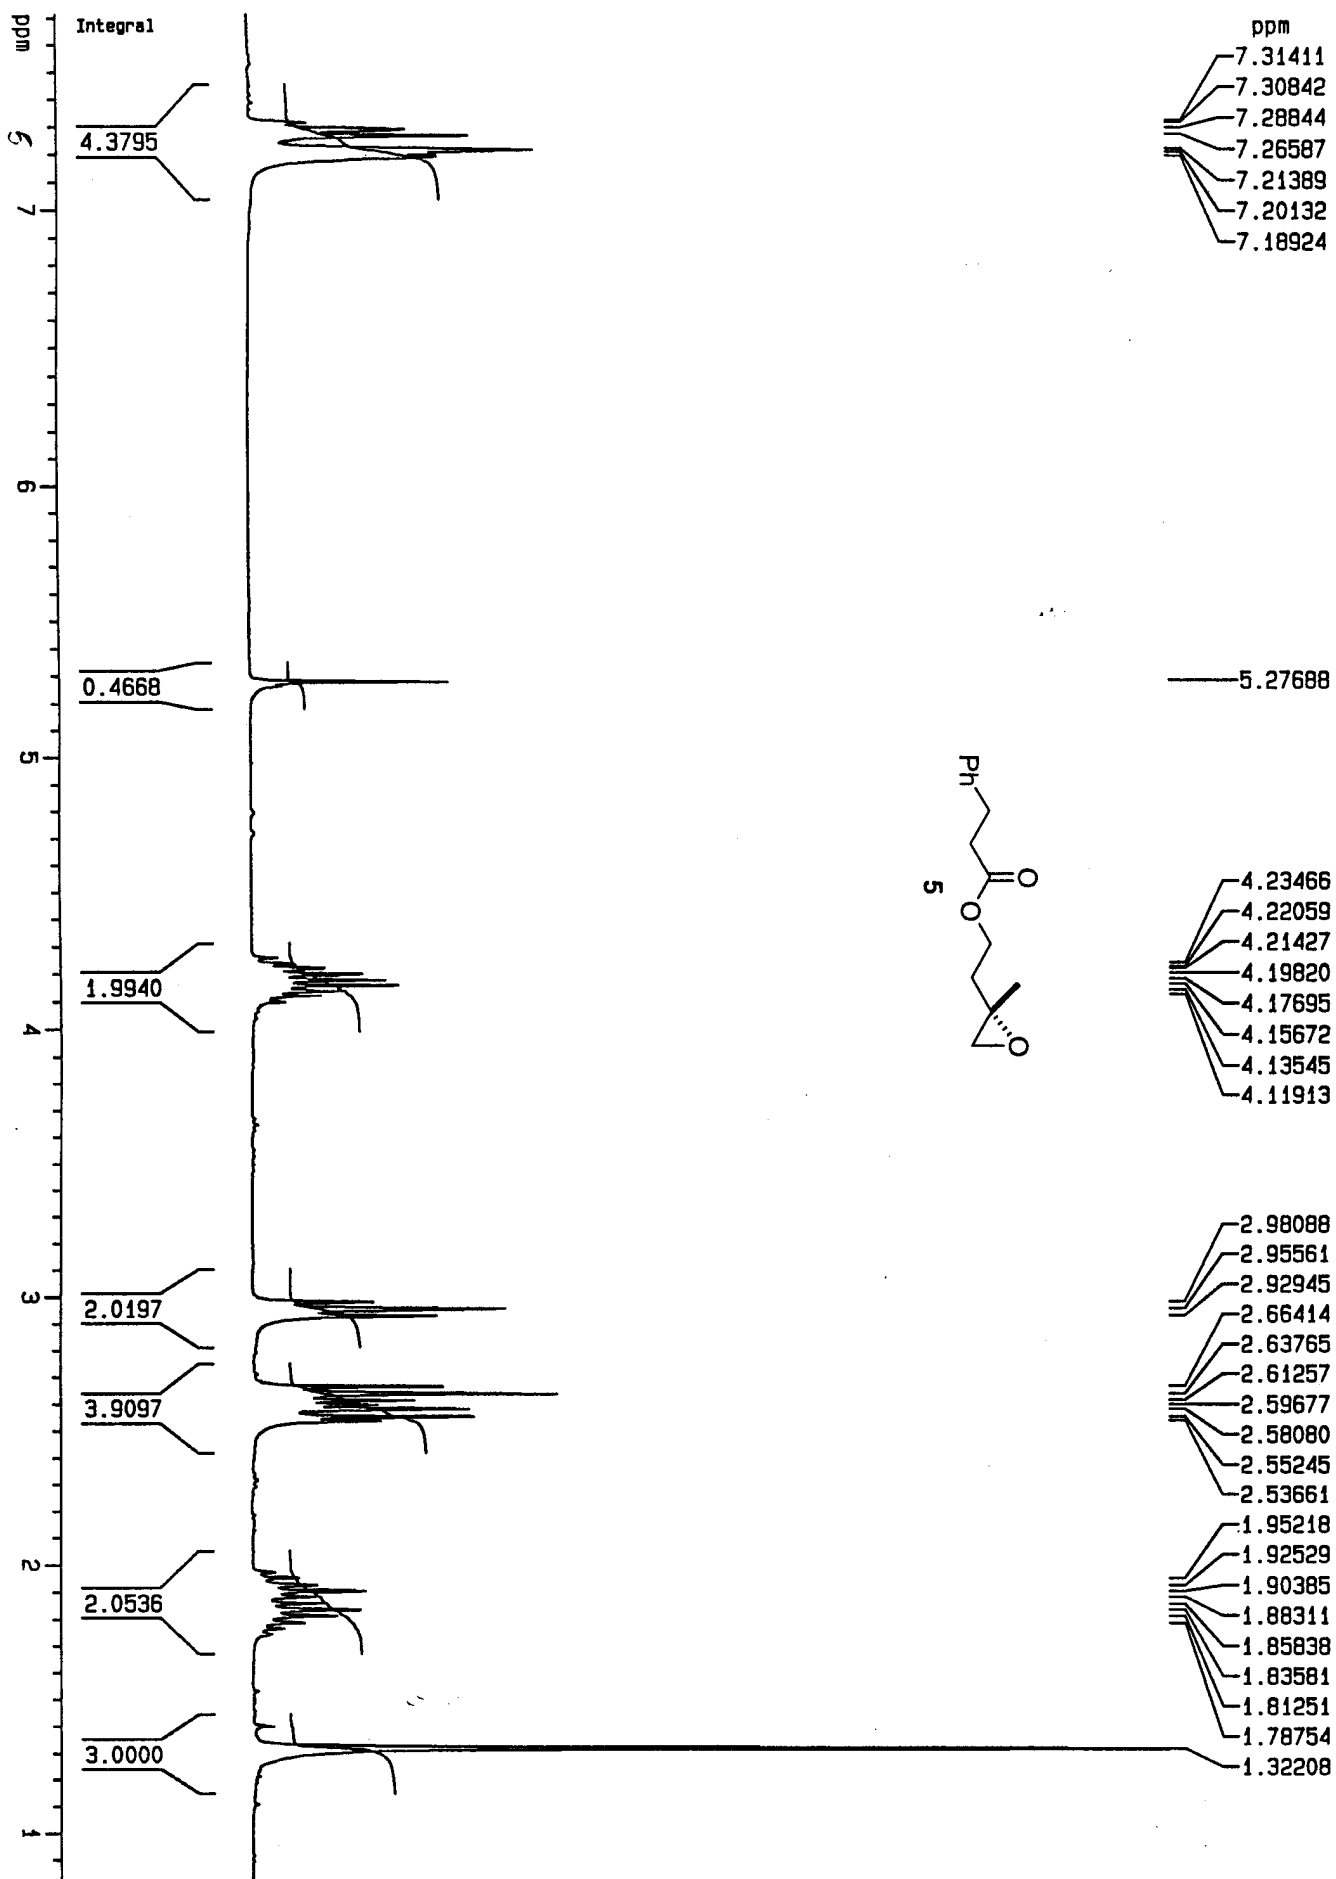

ppm

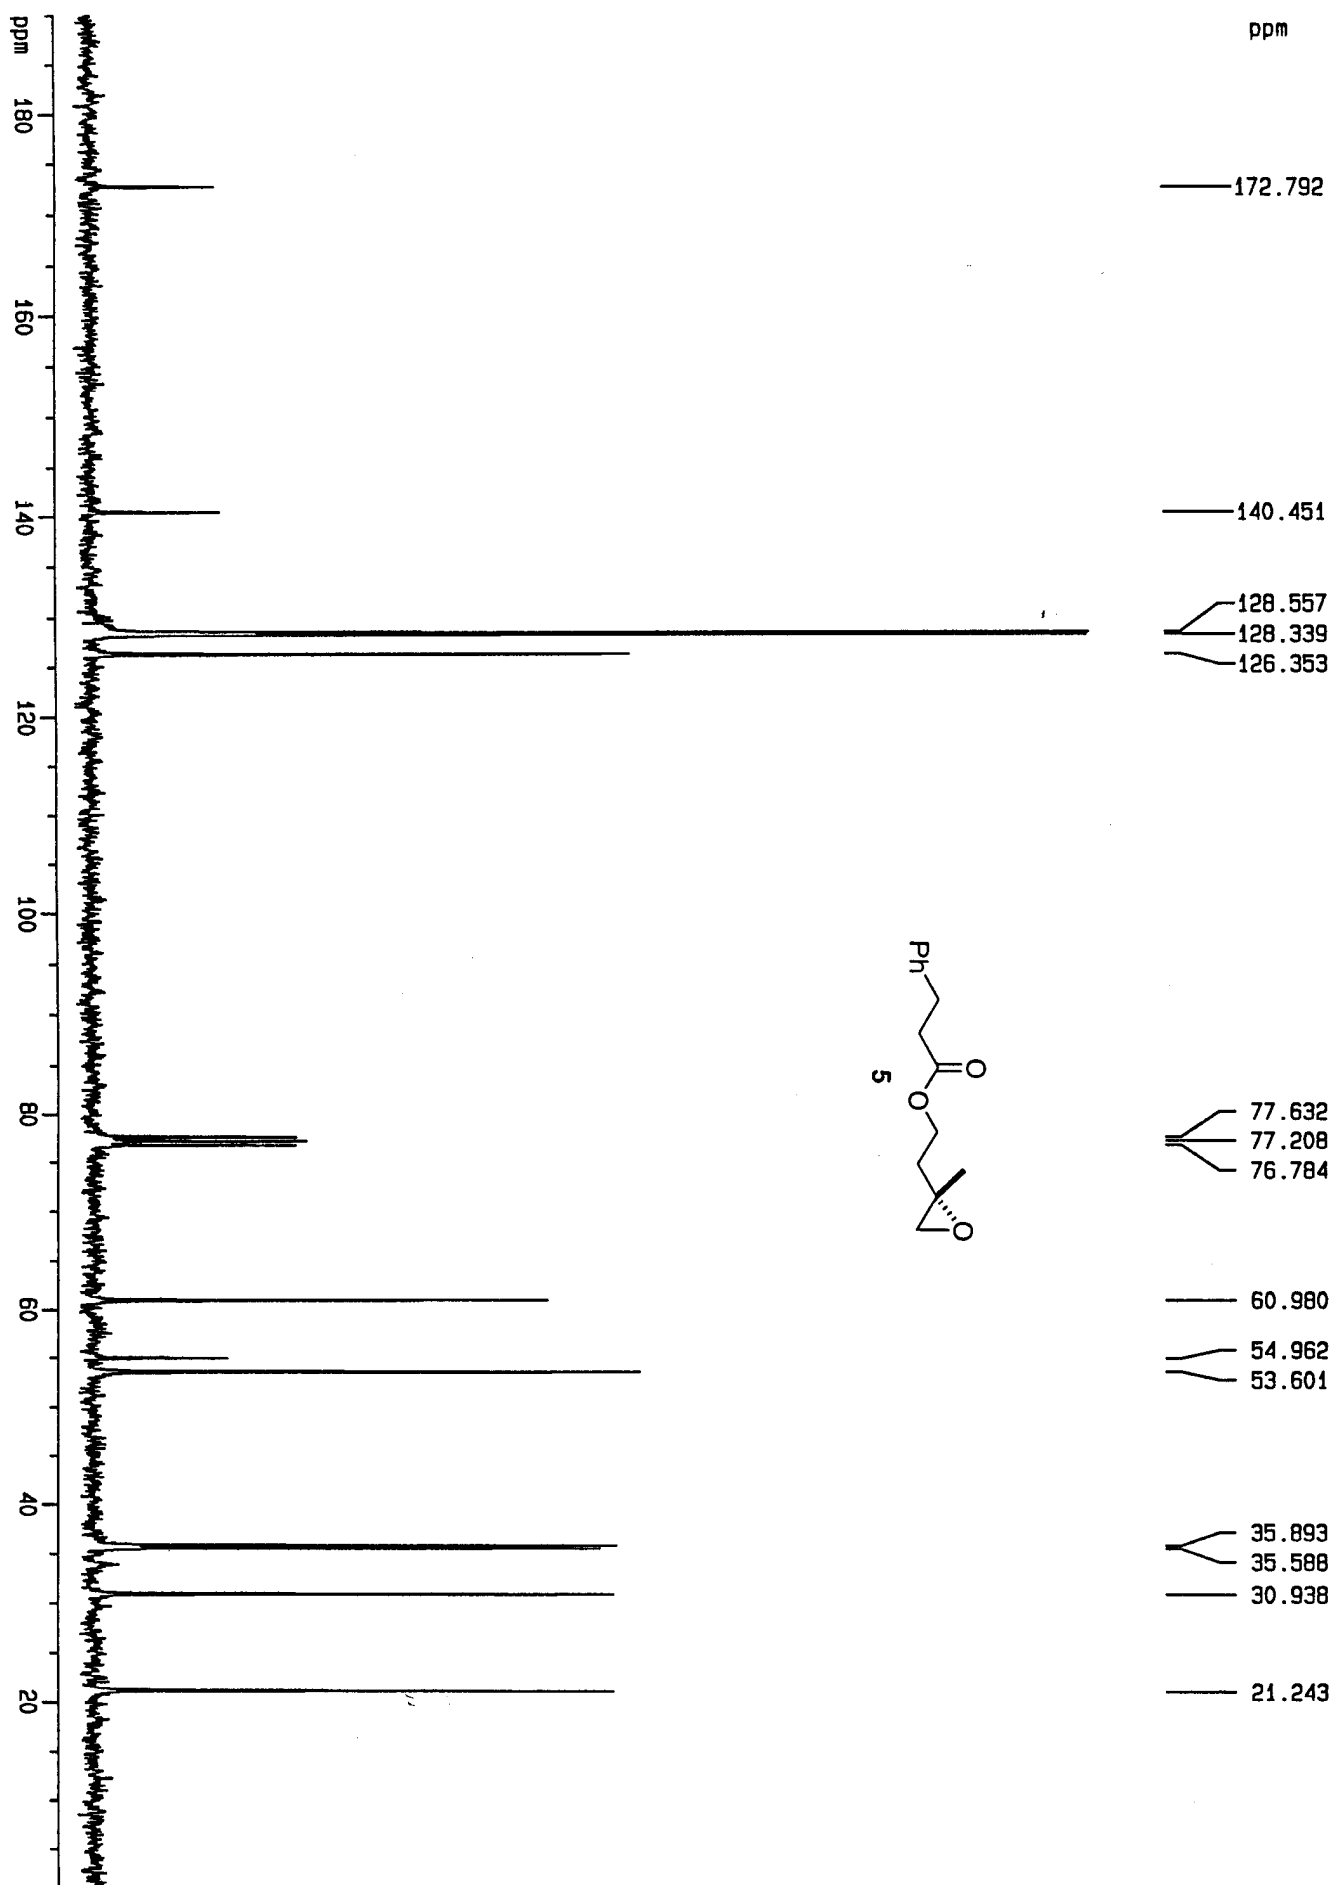

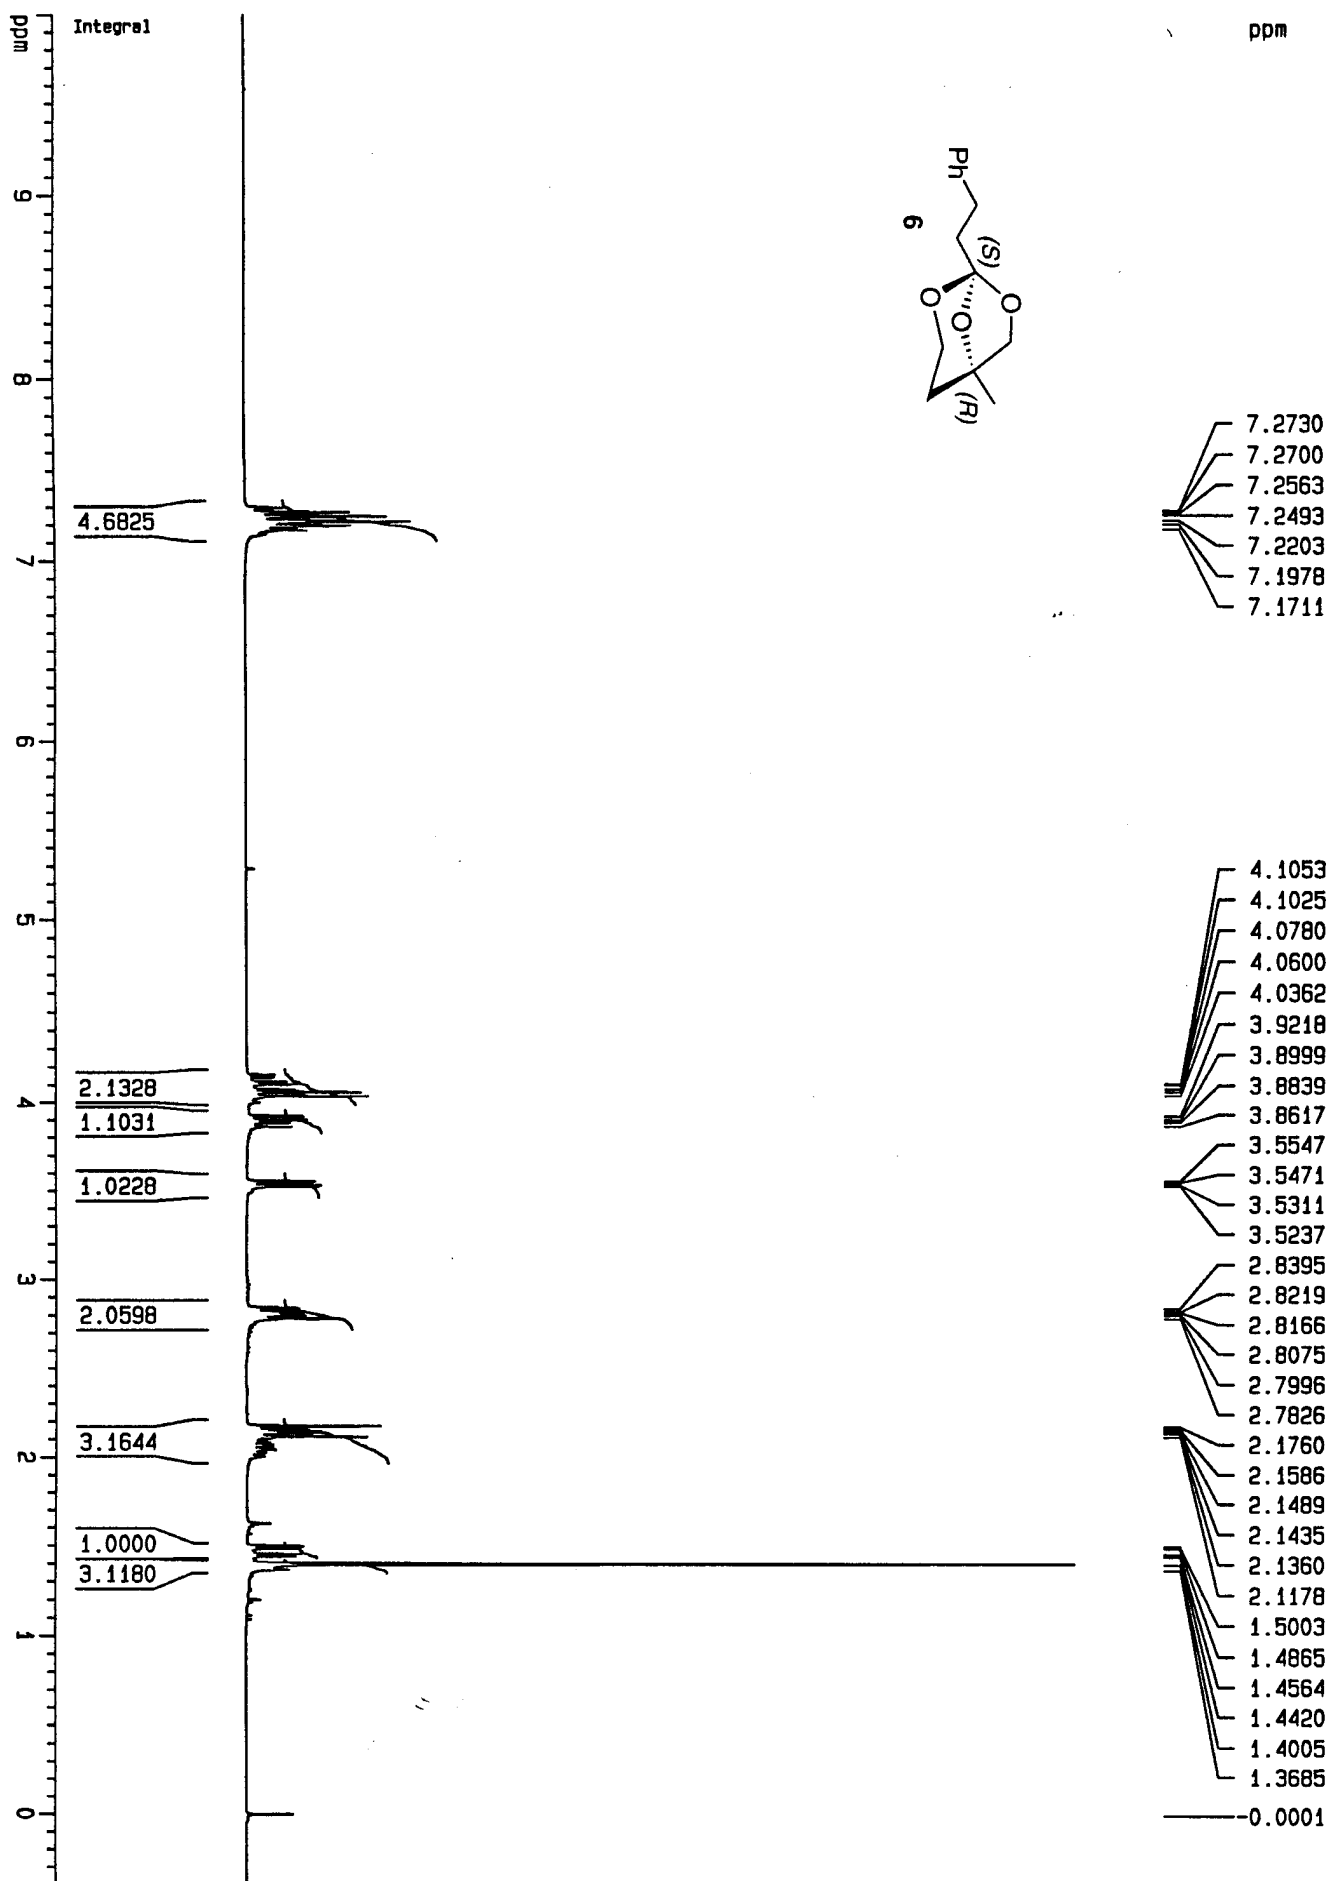

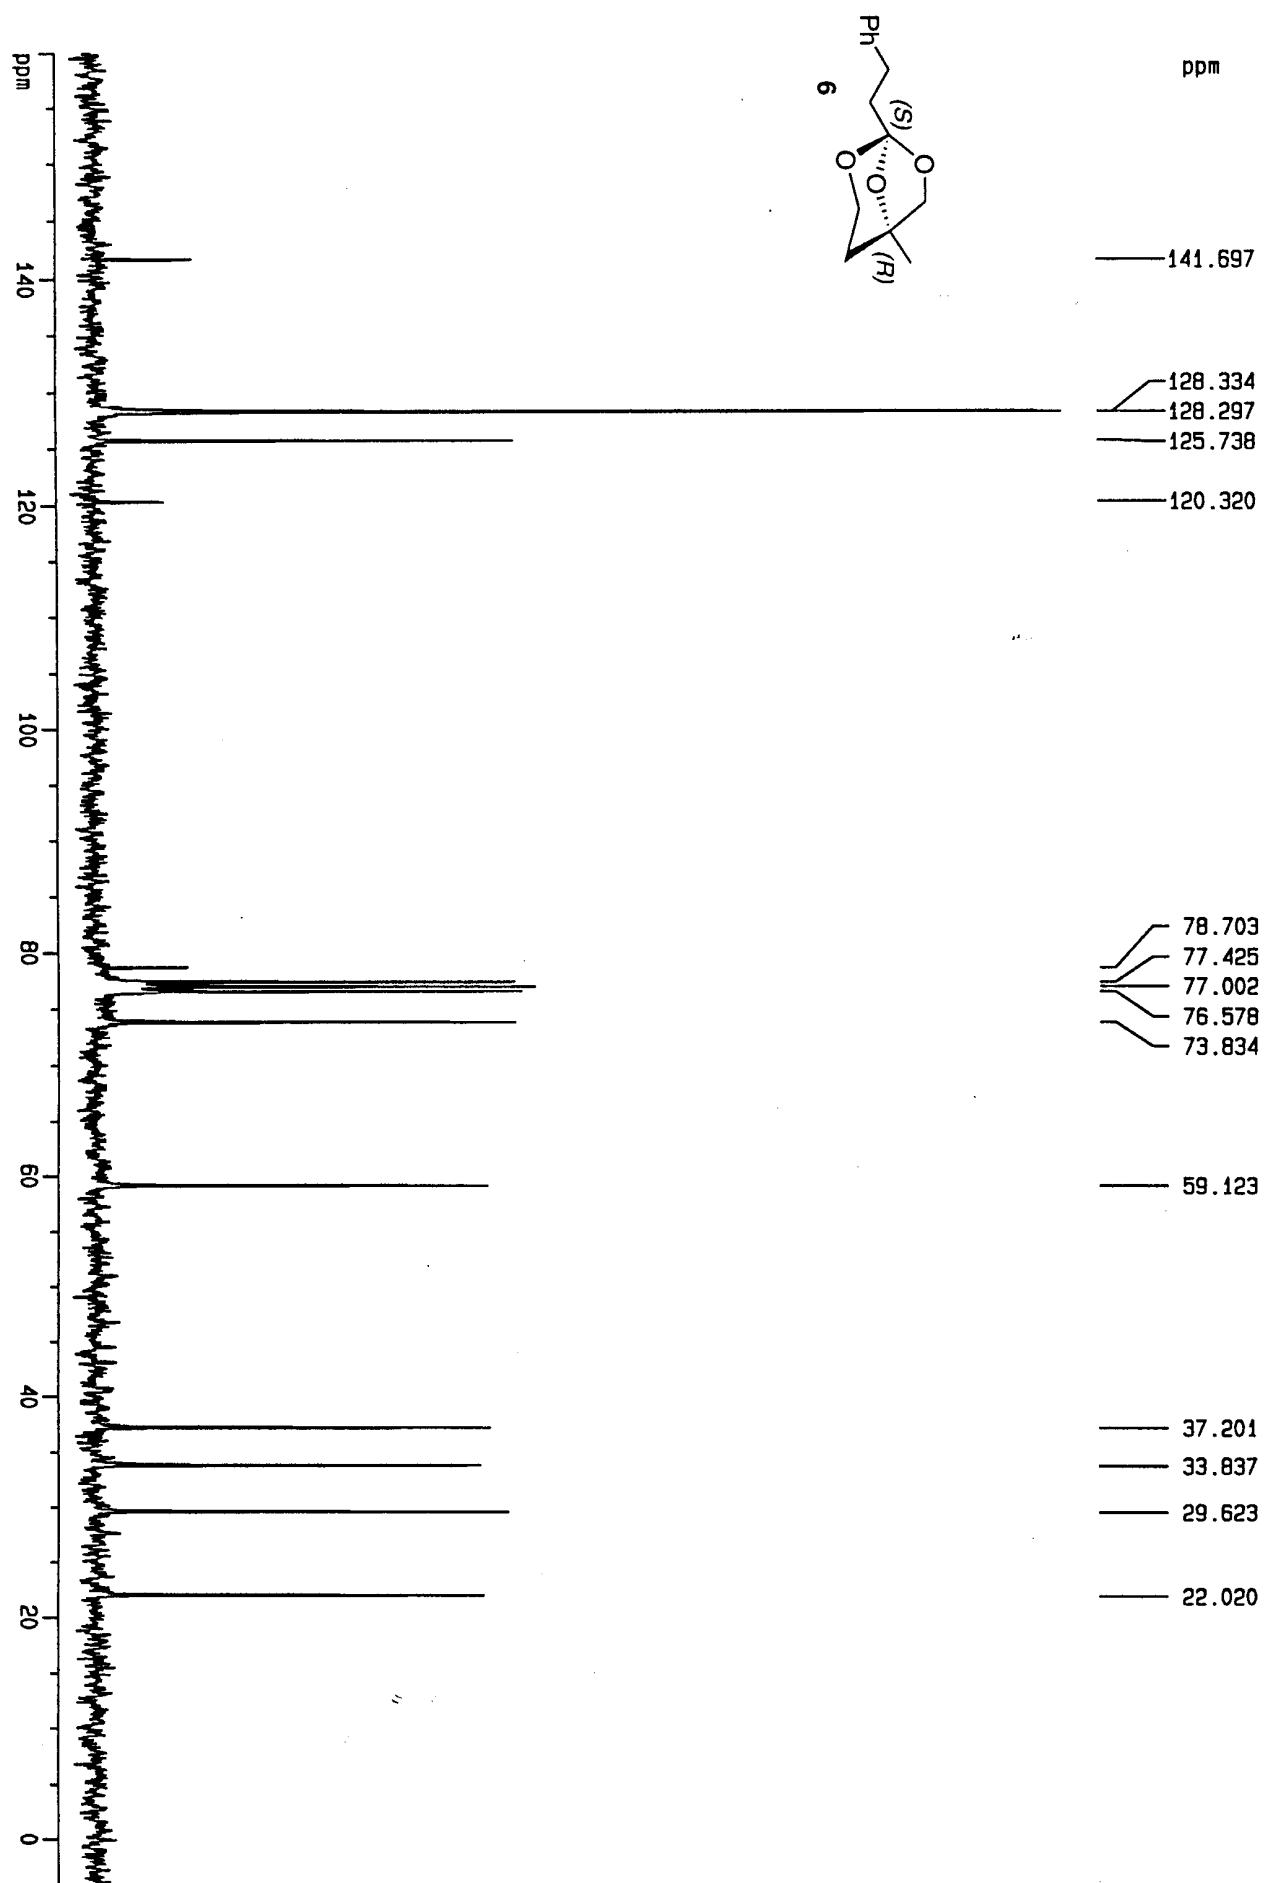

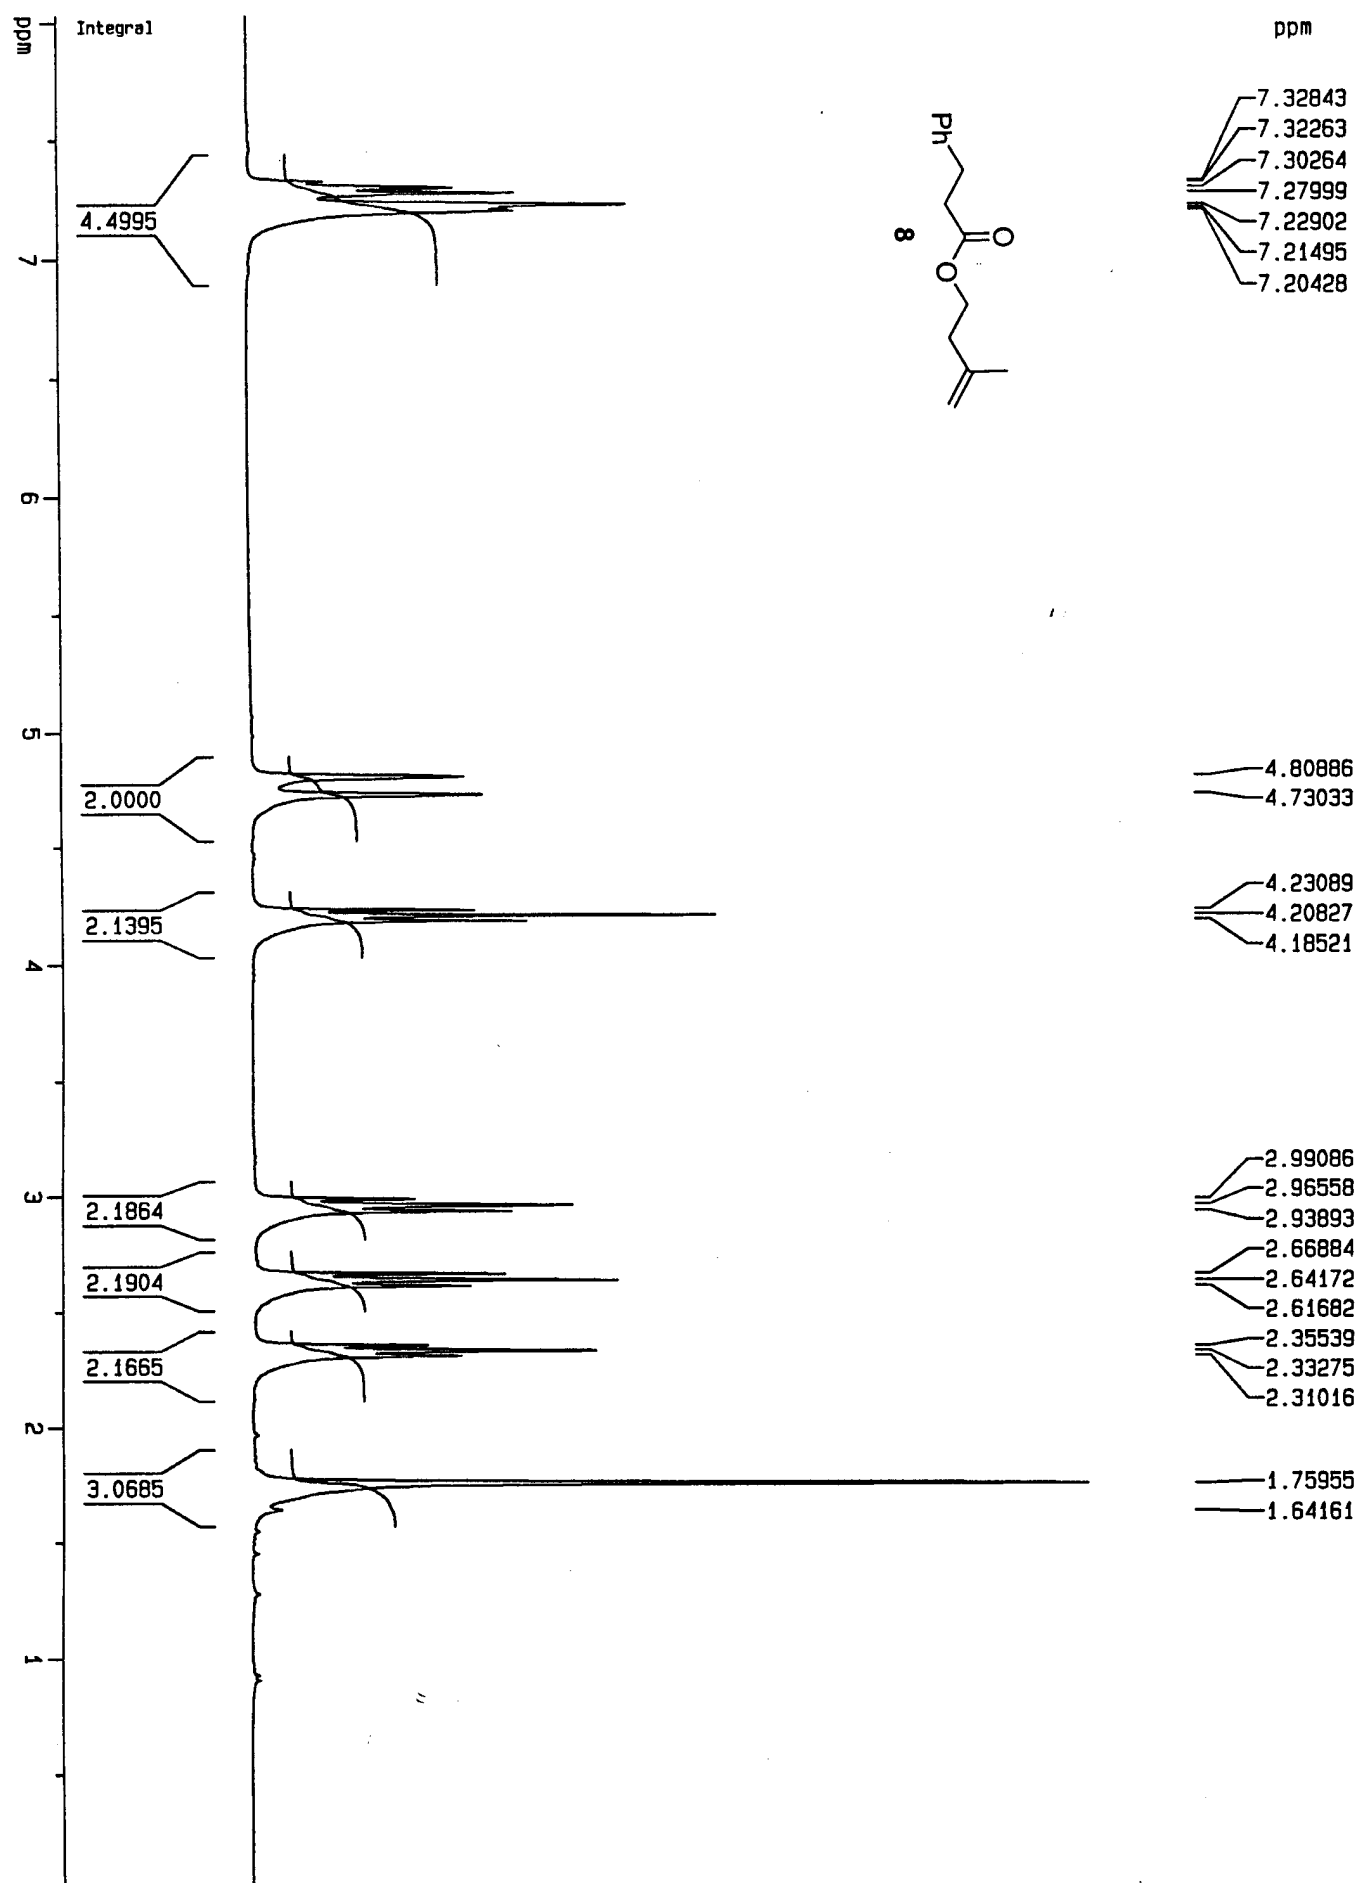

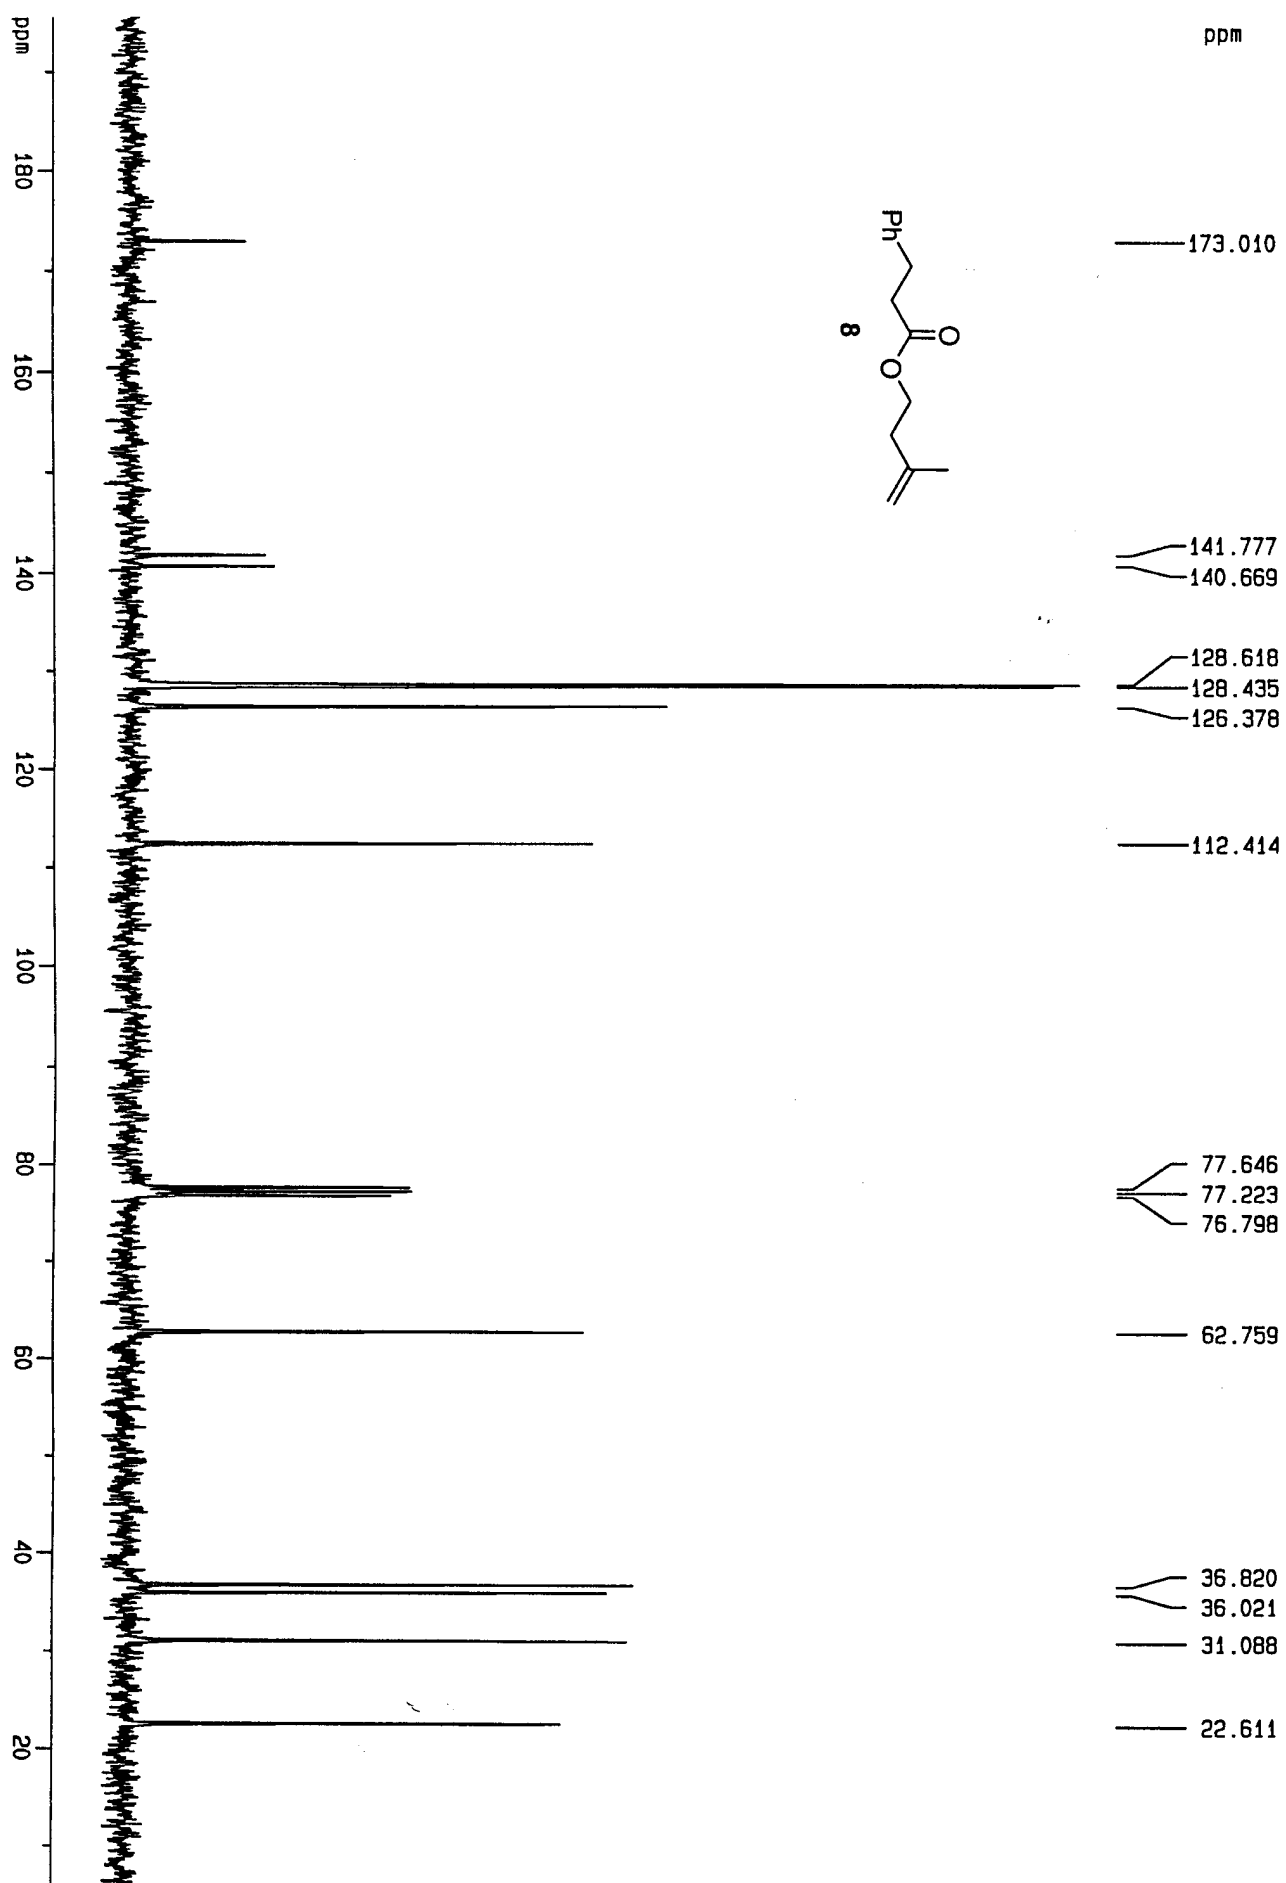



ppm

7.3149  
7.2883  
7.2750  
7.2656  
7.2564  
7.2130  
7.1882

4.0030  
3.9876  
3.9724  
3.9572  
3.9363  
3.9187  
3.9008  
3.4104  
3.3899  
2.7317  
2.7146  
2.7059  
2.7014  
2.6904  
2.6743  
2.1453  
2.1240  
2.0809  
2.0651  
2.0537  
2.0401  
2.0227  
2.0104  
1.6740  
1.4409  
1.4325  
1.4131  
1.3970  
1.3091  
1.3010  
-0.0007

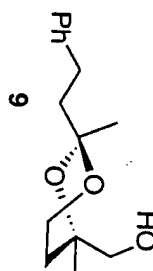

Integral

ppm  
9  
8  
7  
6  
5  
4  
3  
2  
1  
0

2.0772

1.0138

1.0000

0.9993

1.8908

2.0275

1.4259

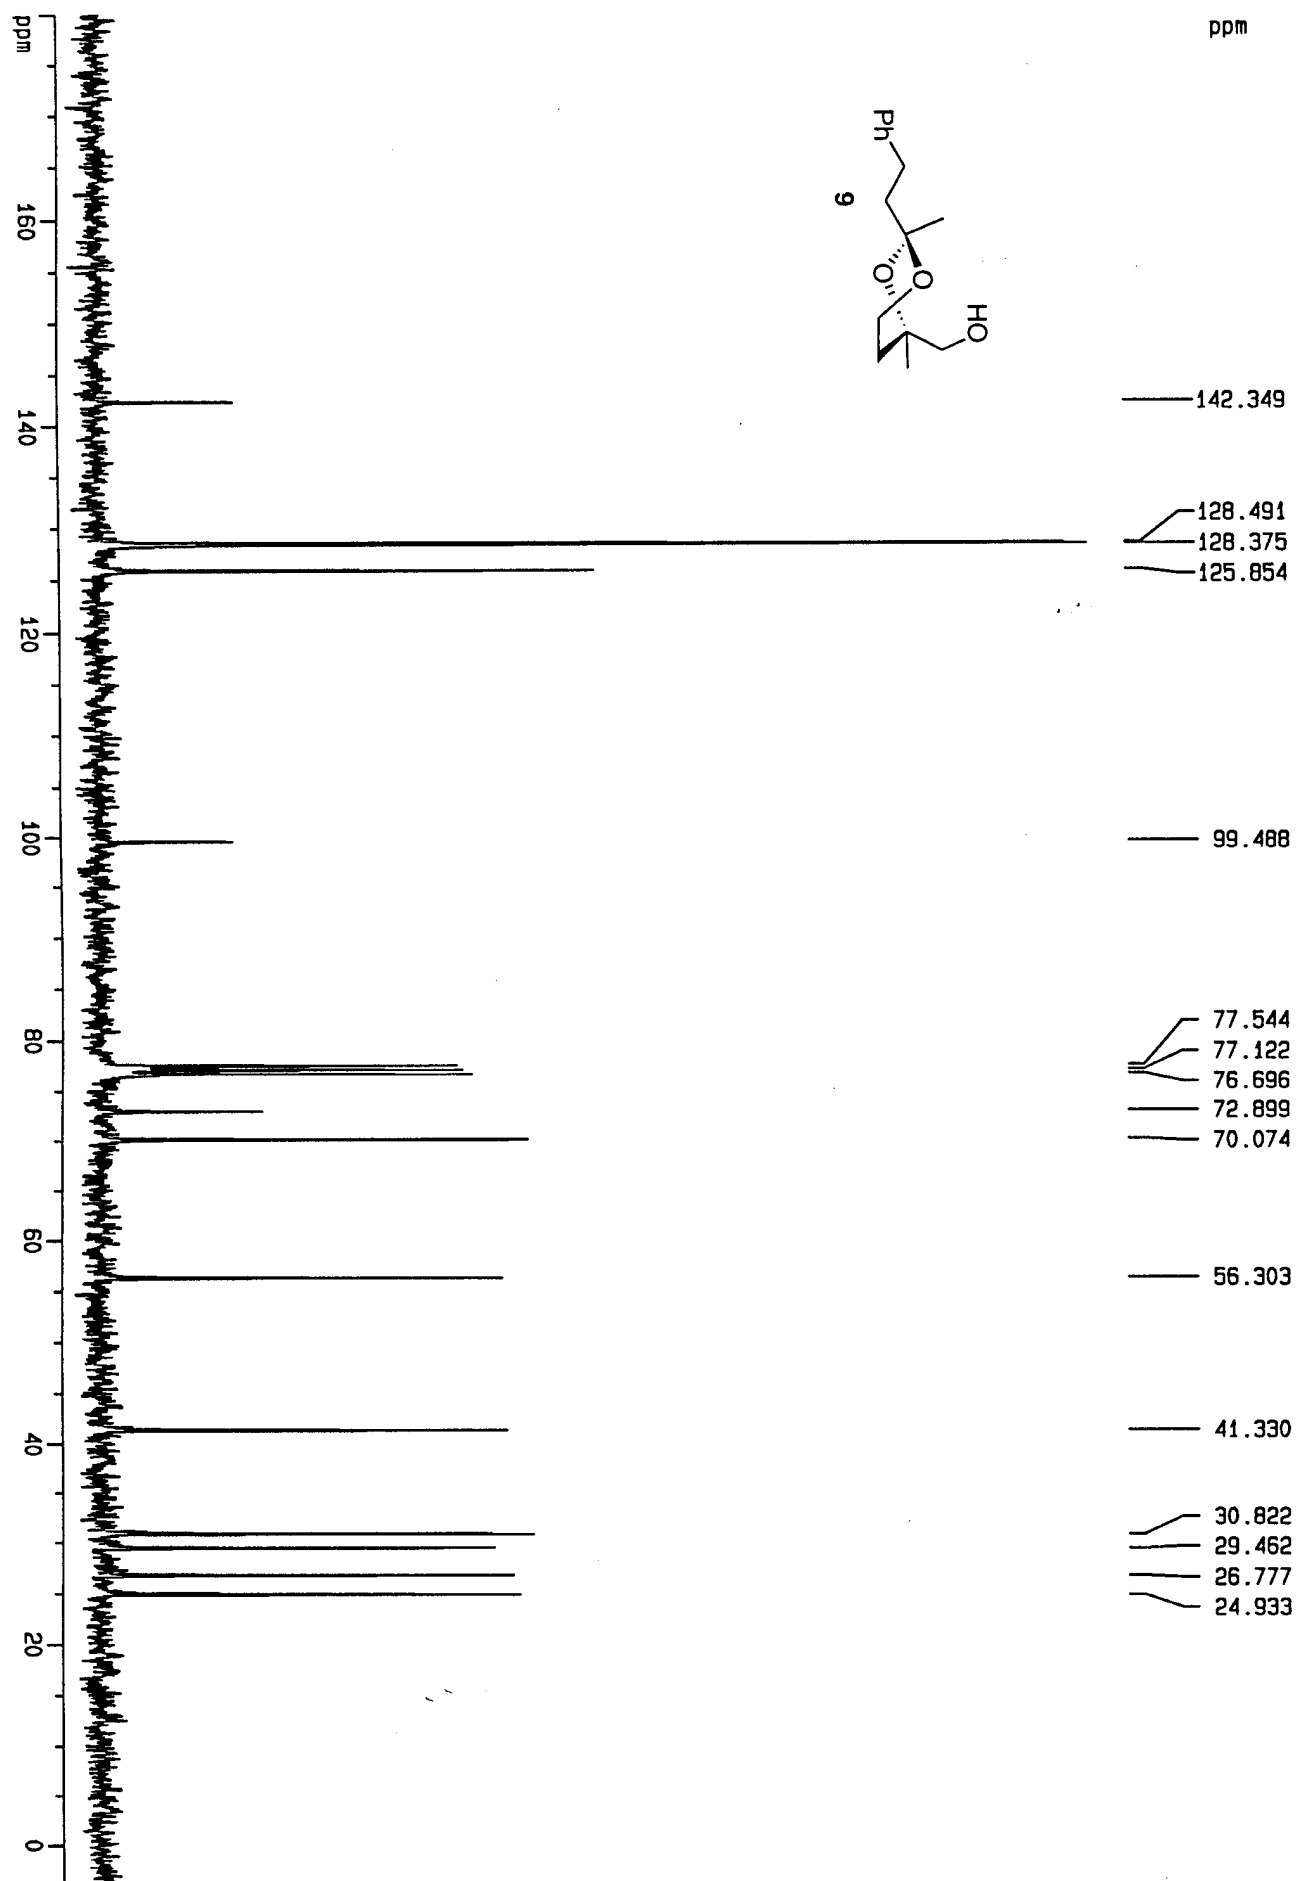

ppm

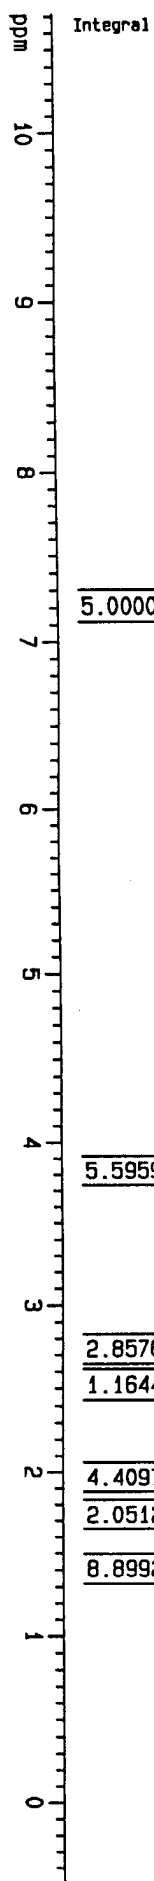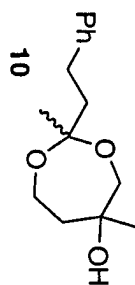

7.29340  
7.27075  
7.21938  
7.19484

3.88601  
3.85748  
3.84834  
3.82049  
3.78580  
2.75741  
2.74059  
2.72176  
2.70177  
2.00302  
1.98441  
1.97960  
1.96347  
1.94266  
1.93077  
1.91342  
1.79131  
1.77601  
1.72846  
1.45242  
1.39696

ppm

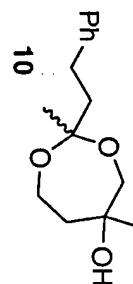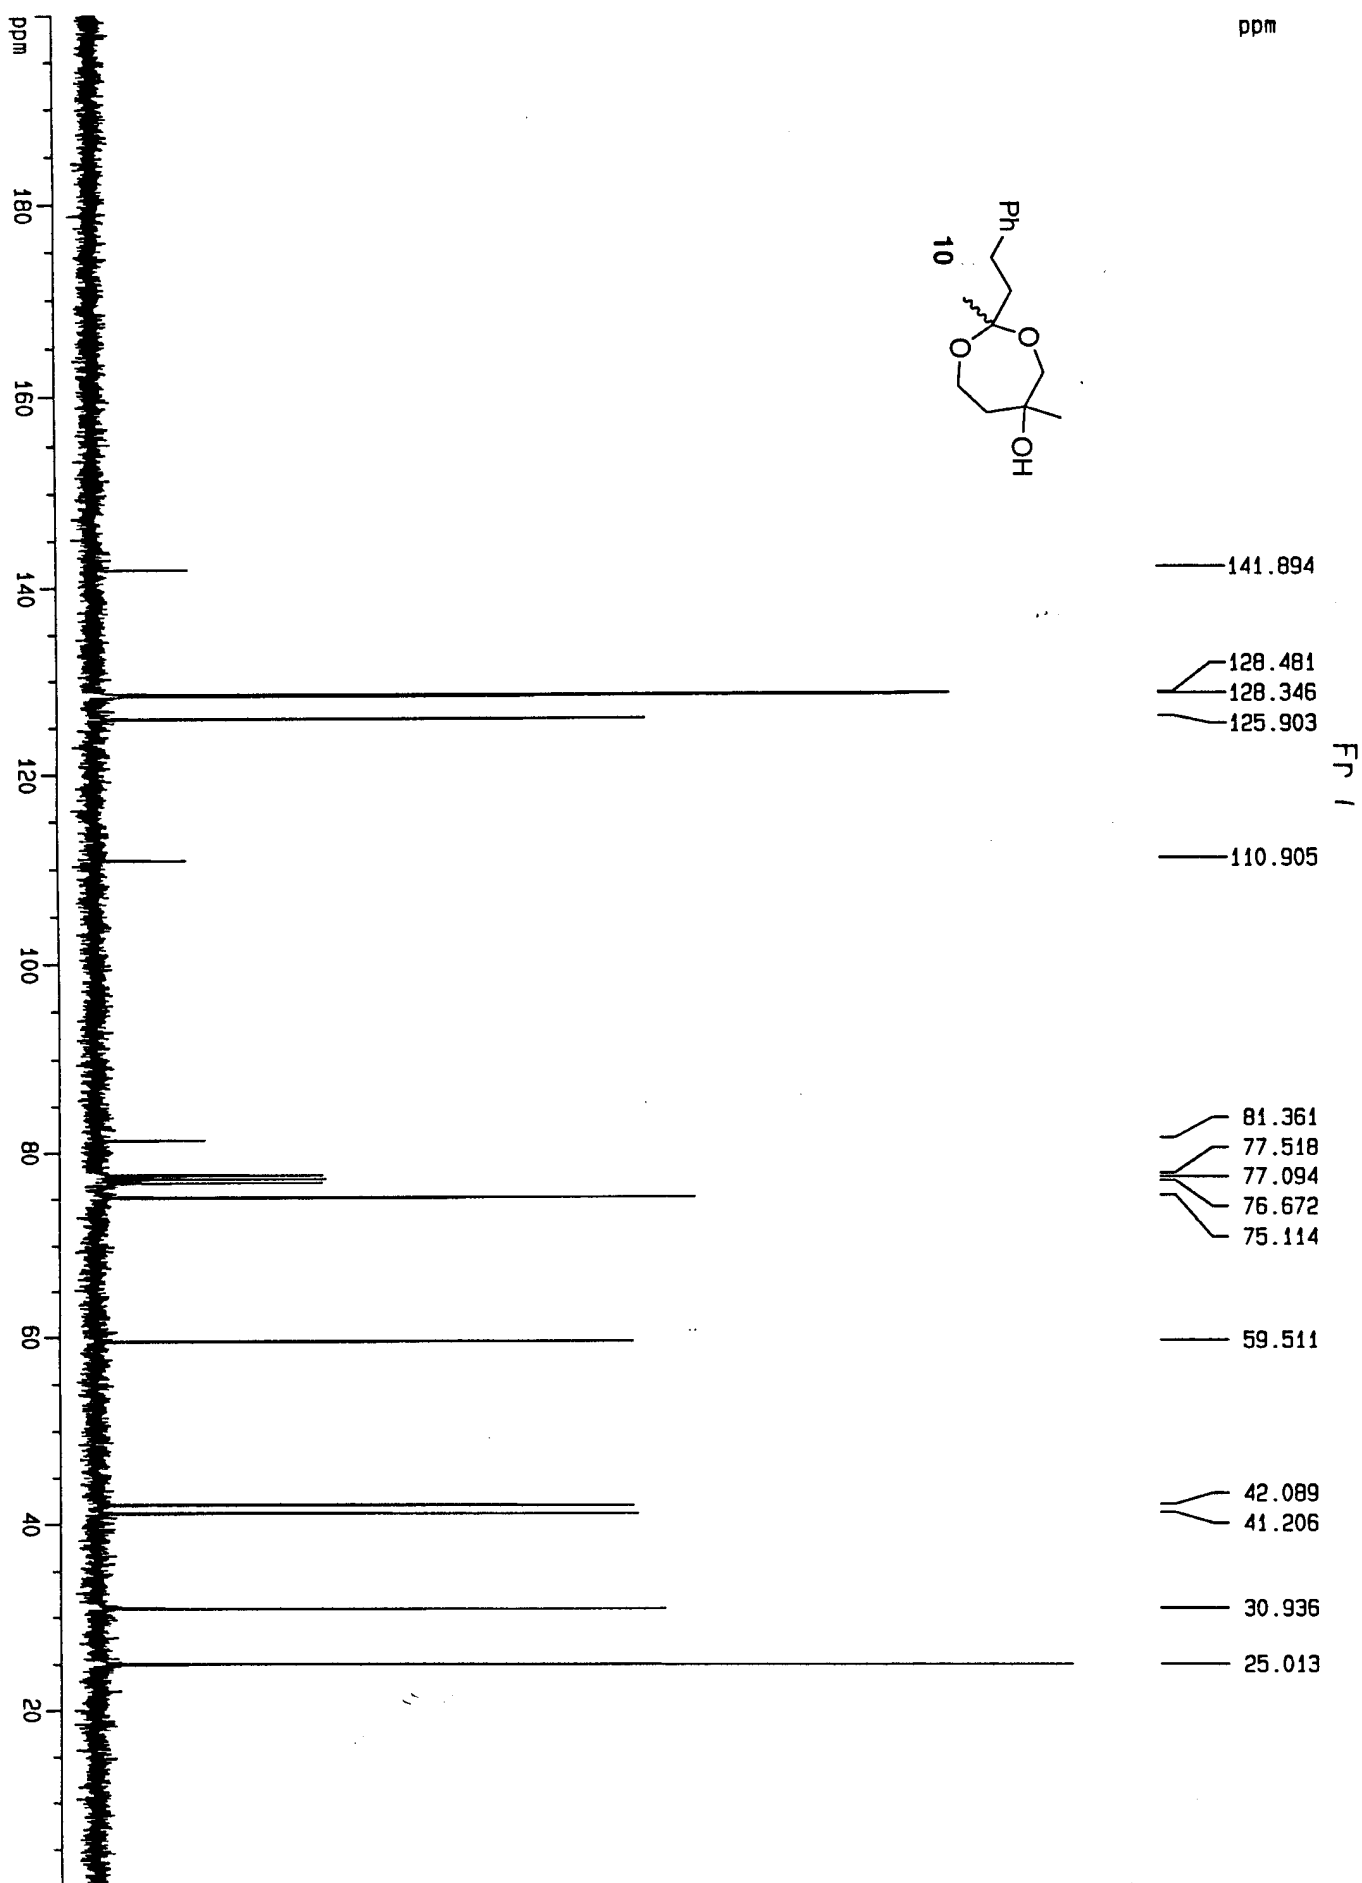

-141.894

**-128.481**

**-128.346**

-125.903

-110.905

- 81.361

77.518

- 77.094

- 76.672

- 75.114

- 59.511

- 42.089

— 41.206

- 30.936

— 25.013

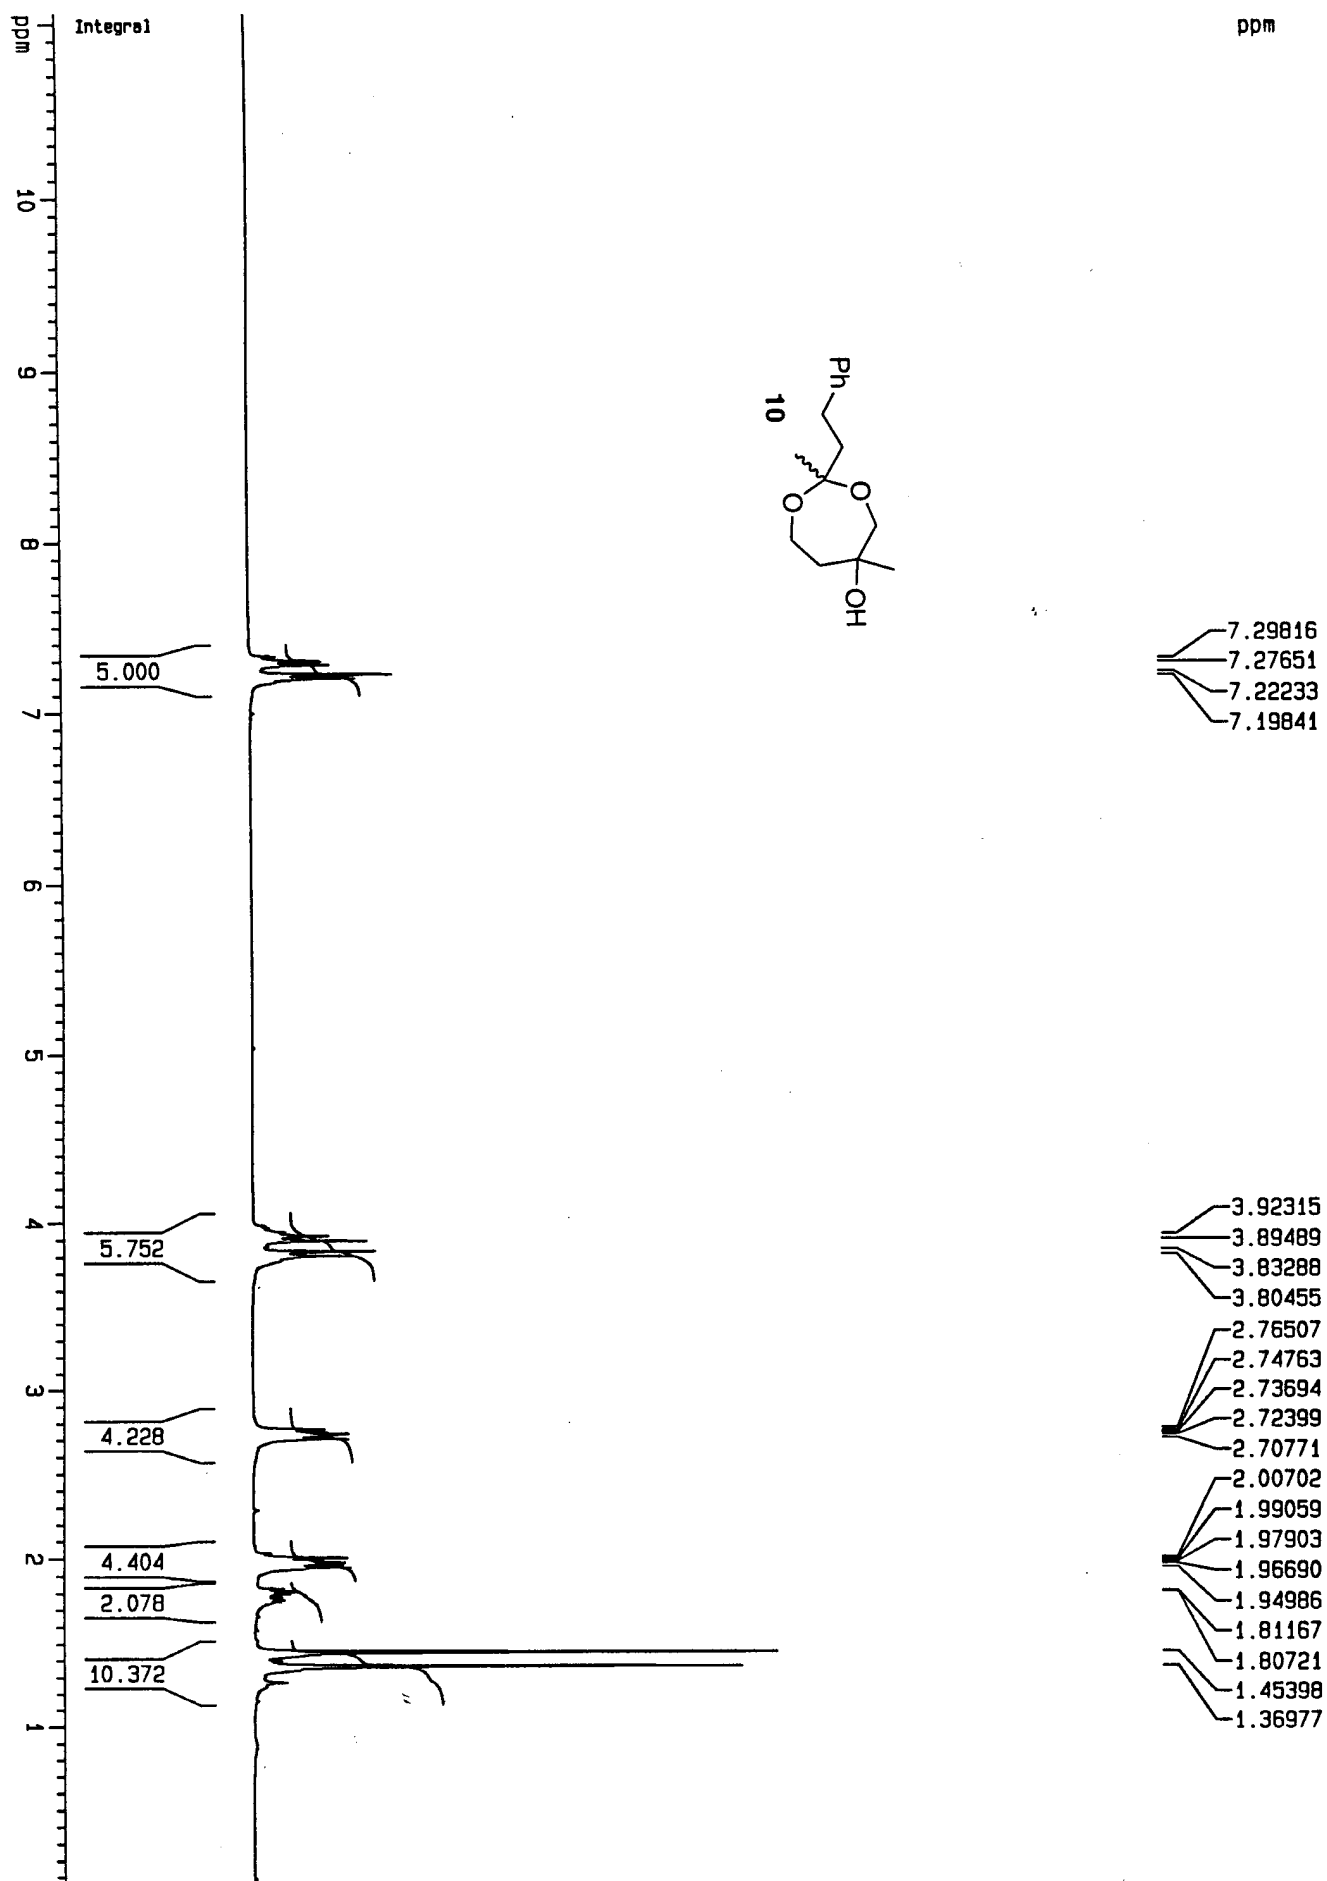

ppm

Fr. 2

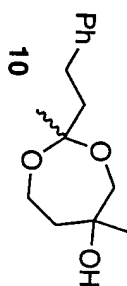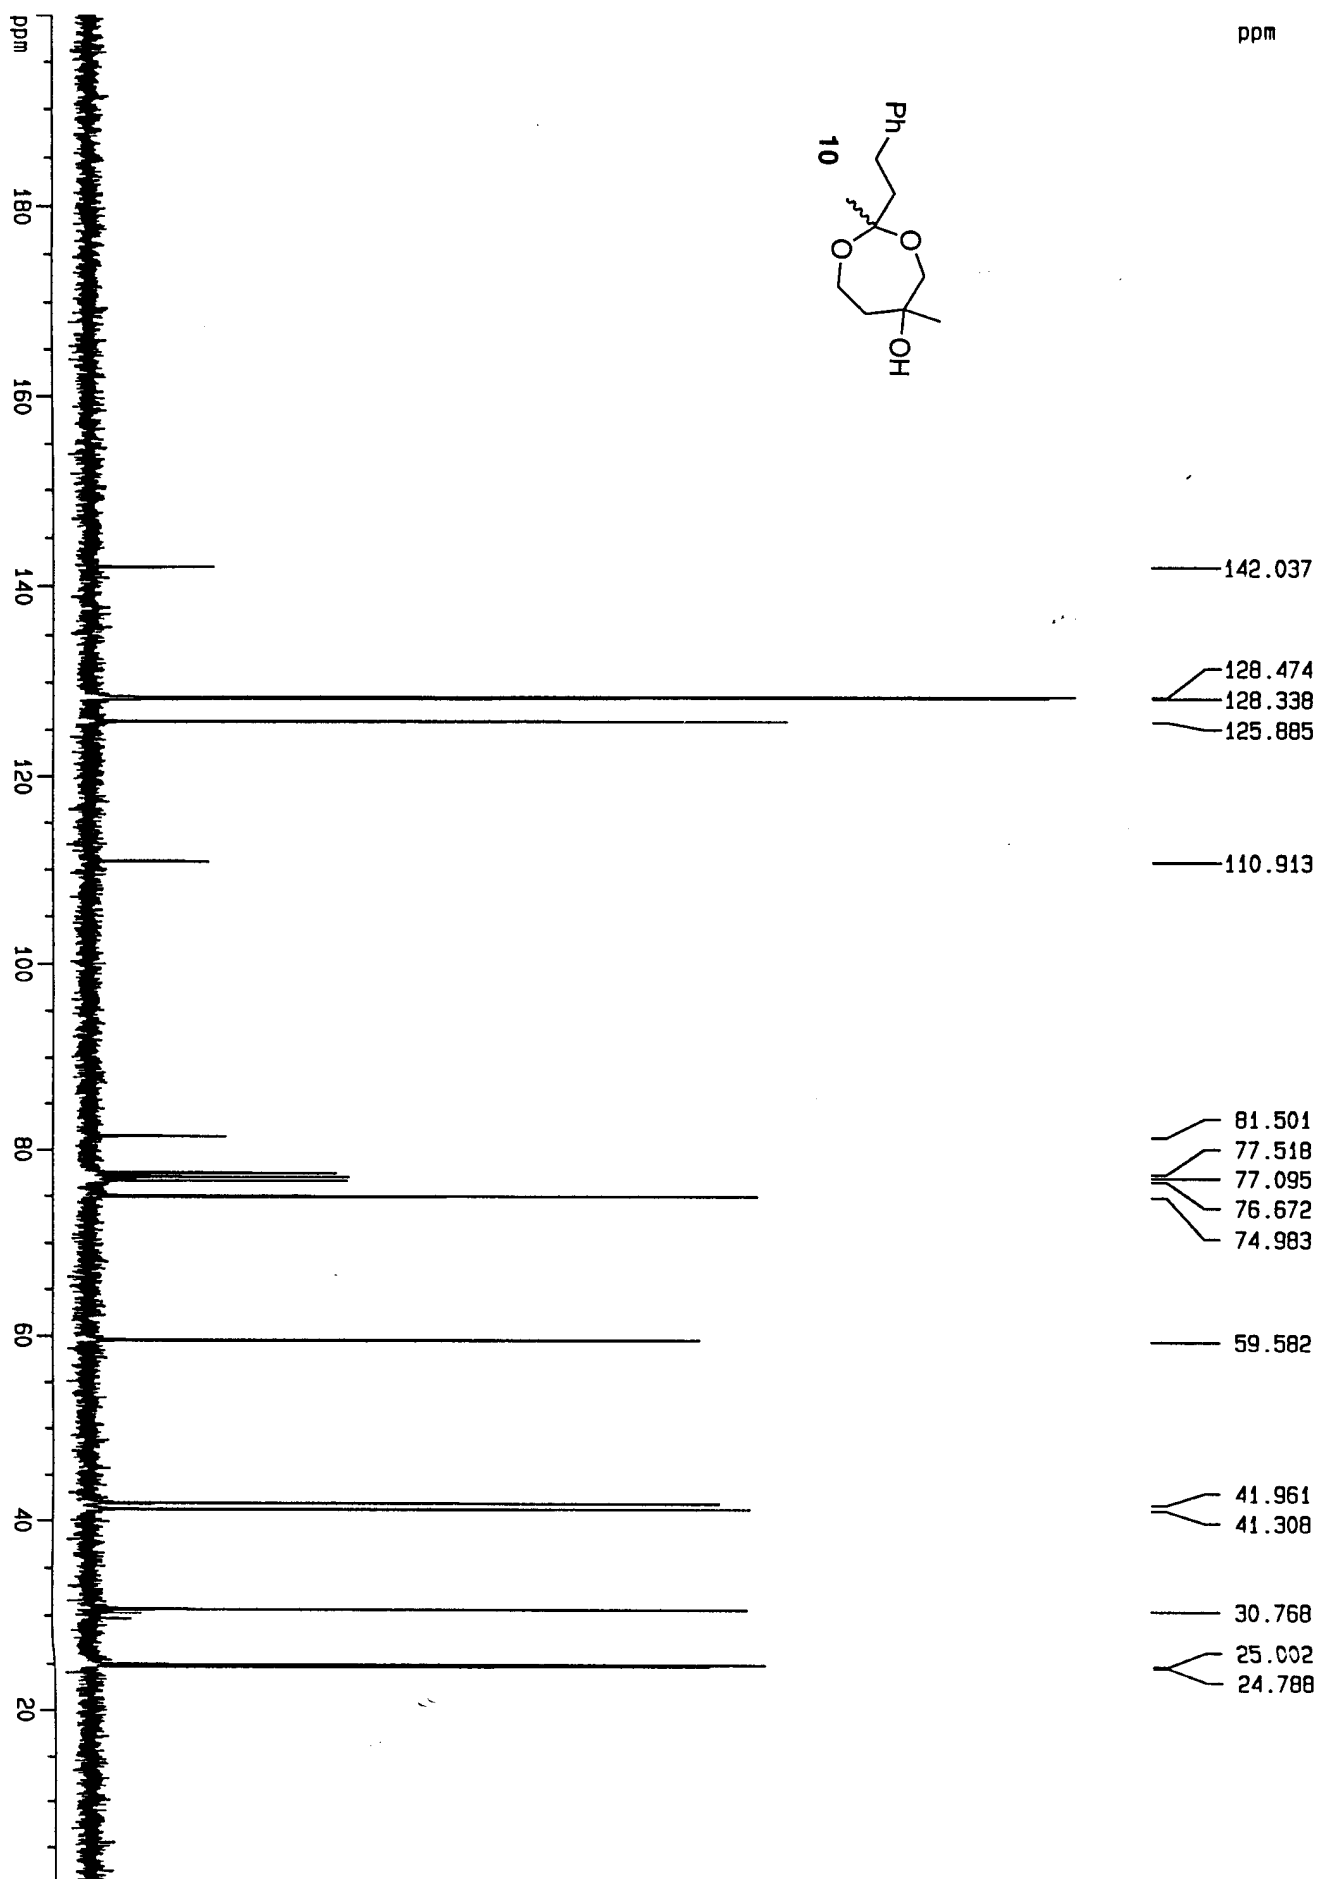

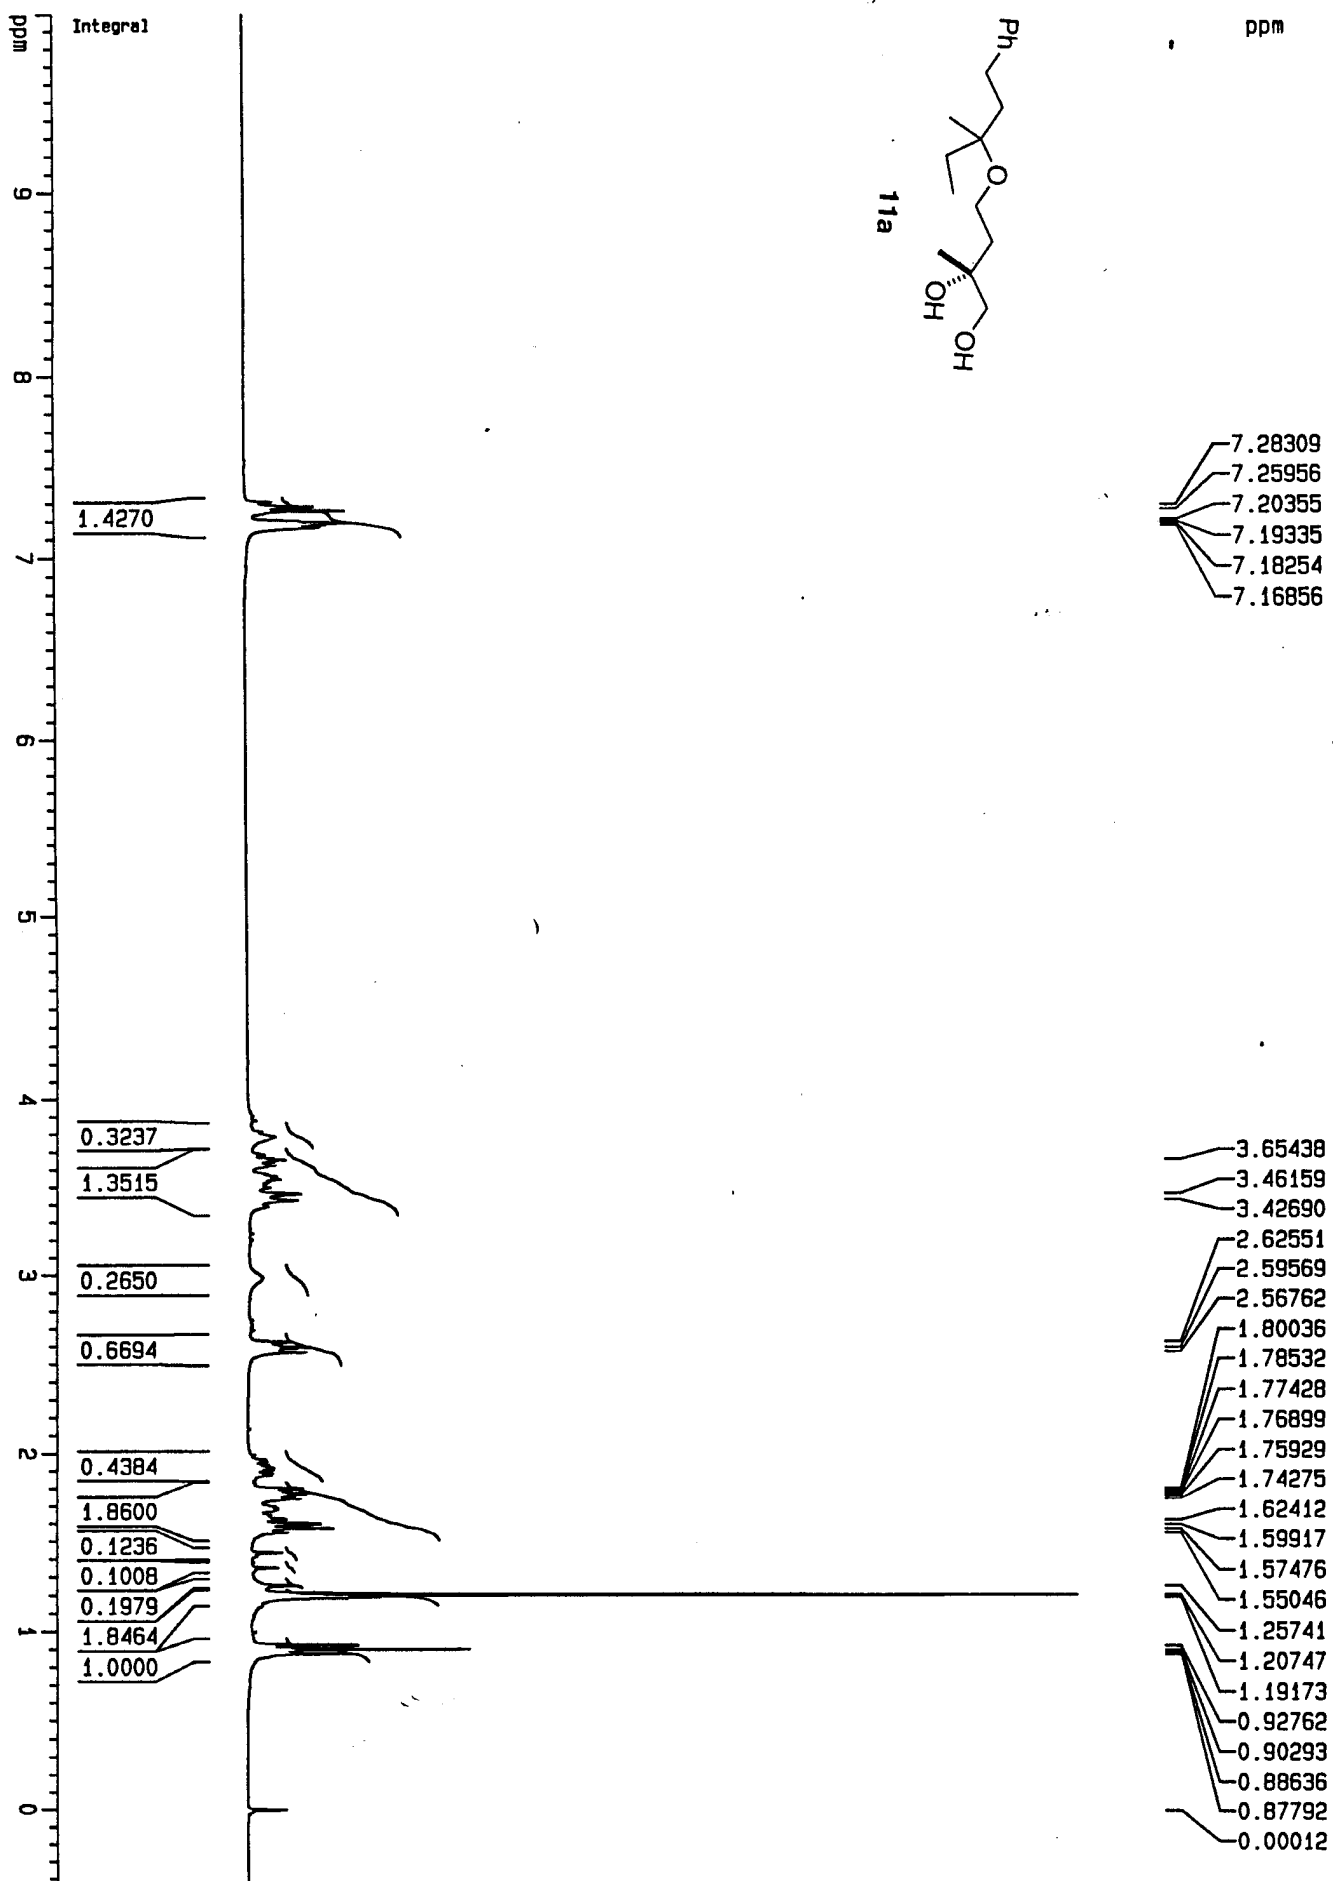

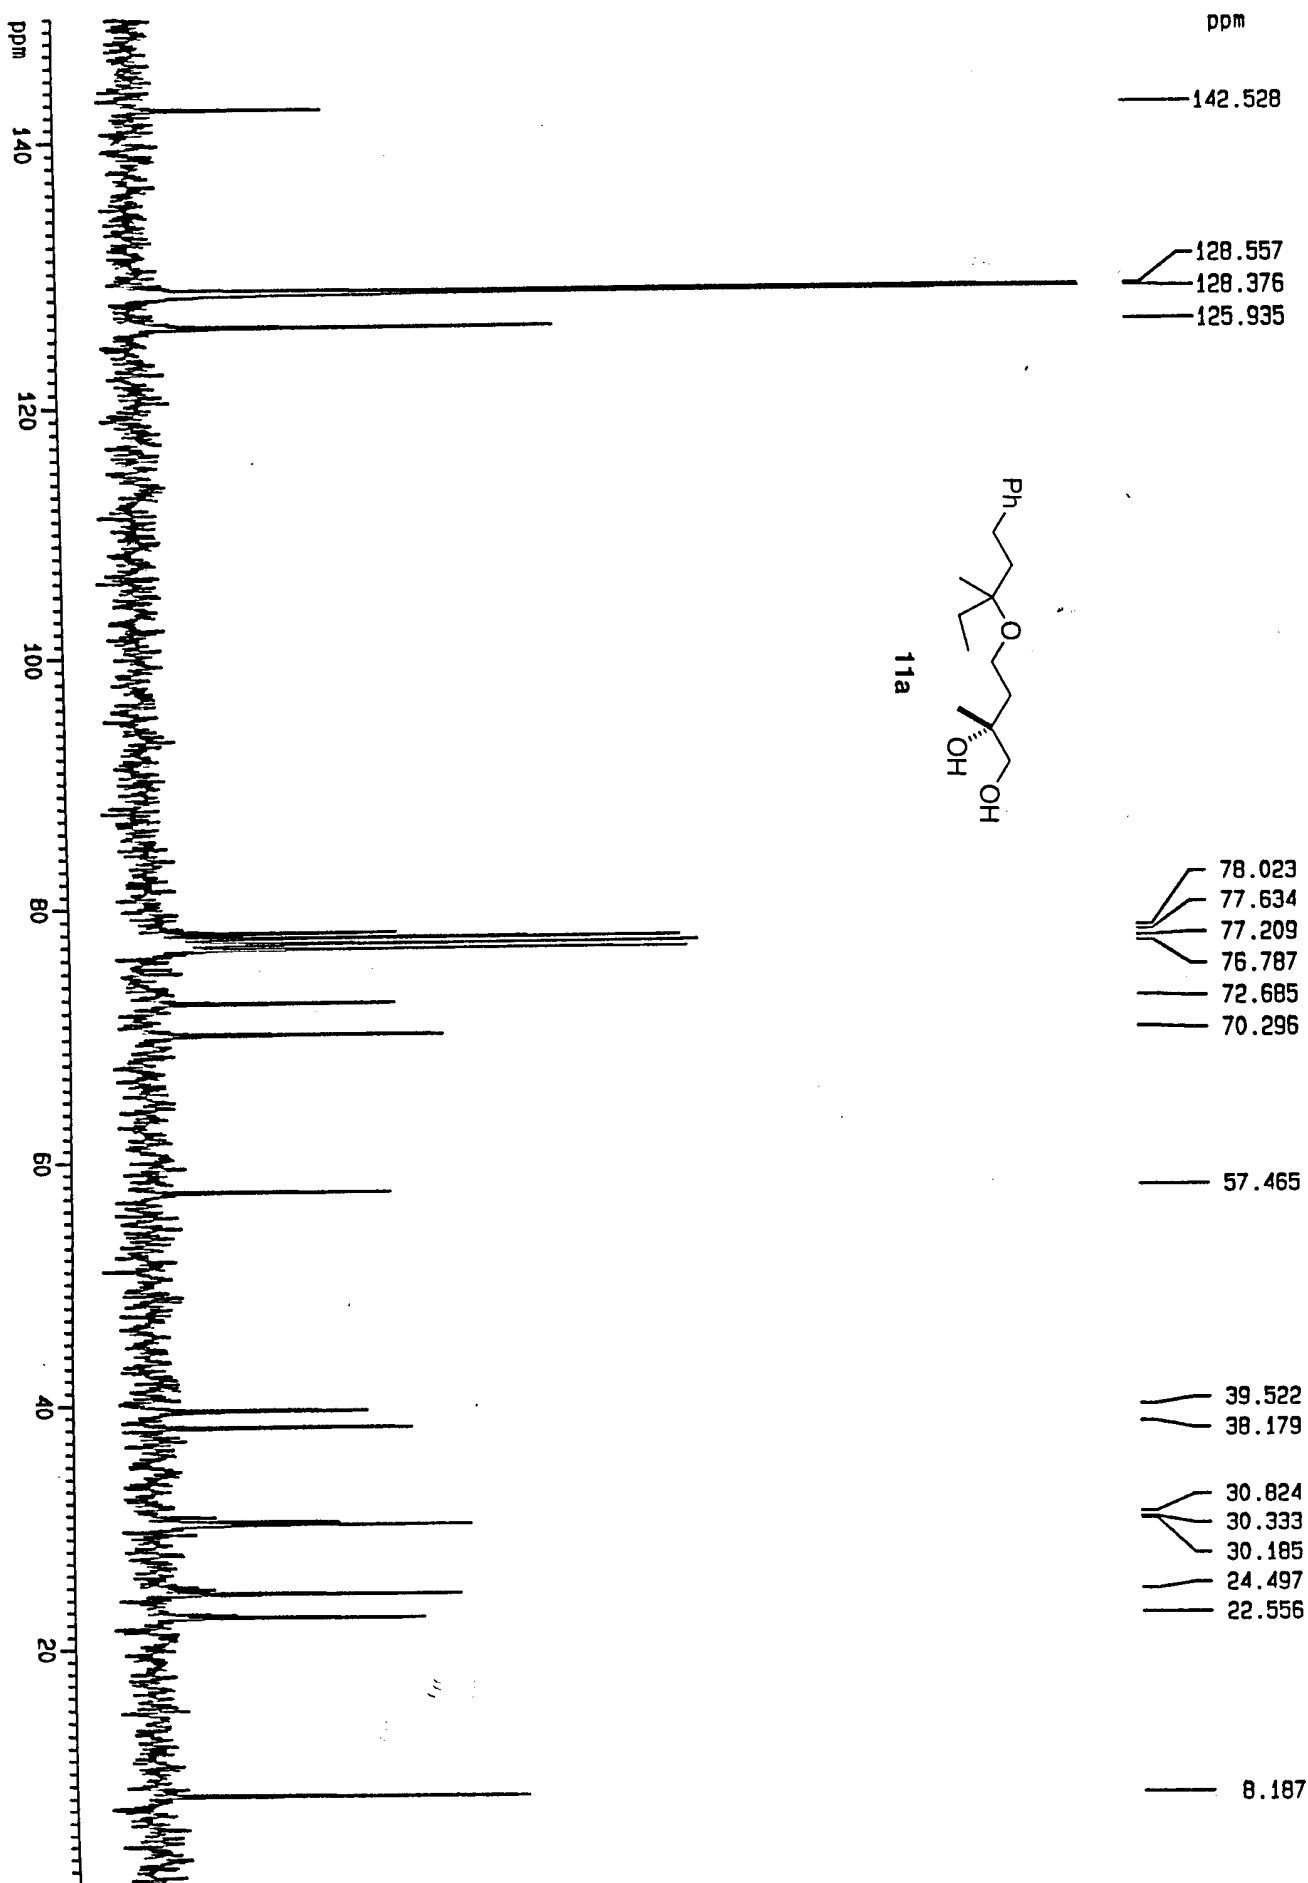



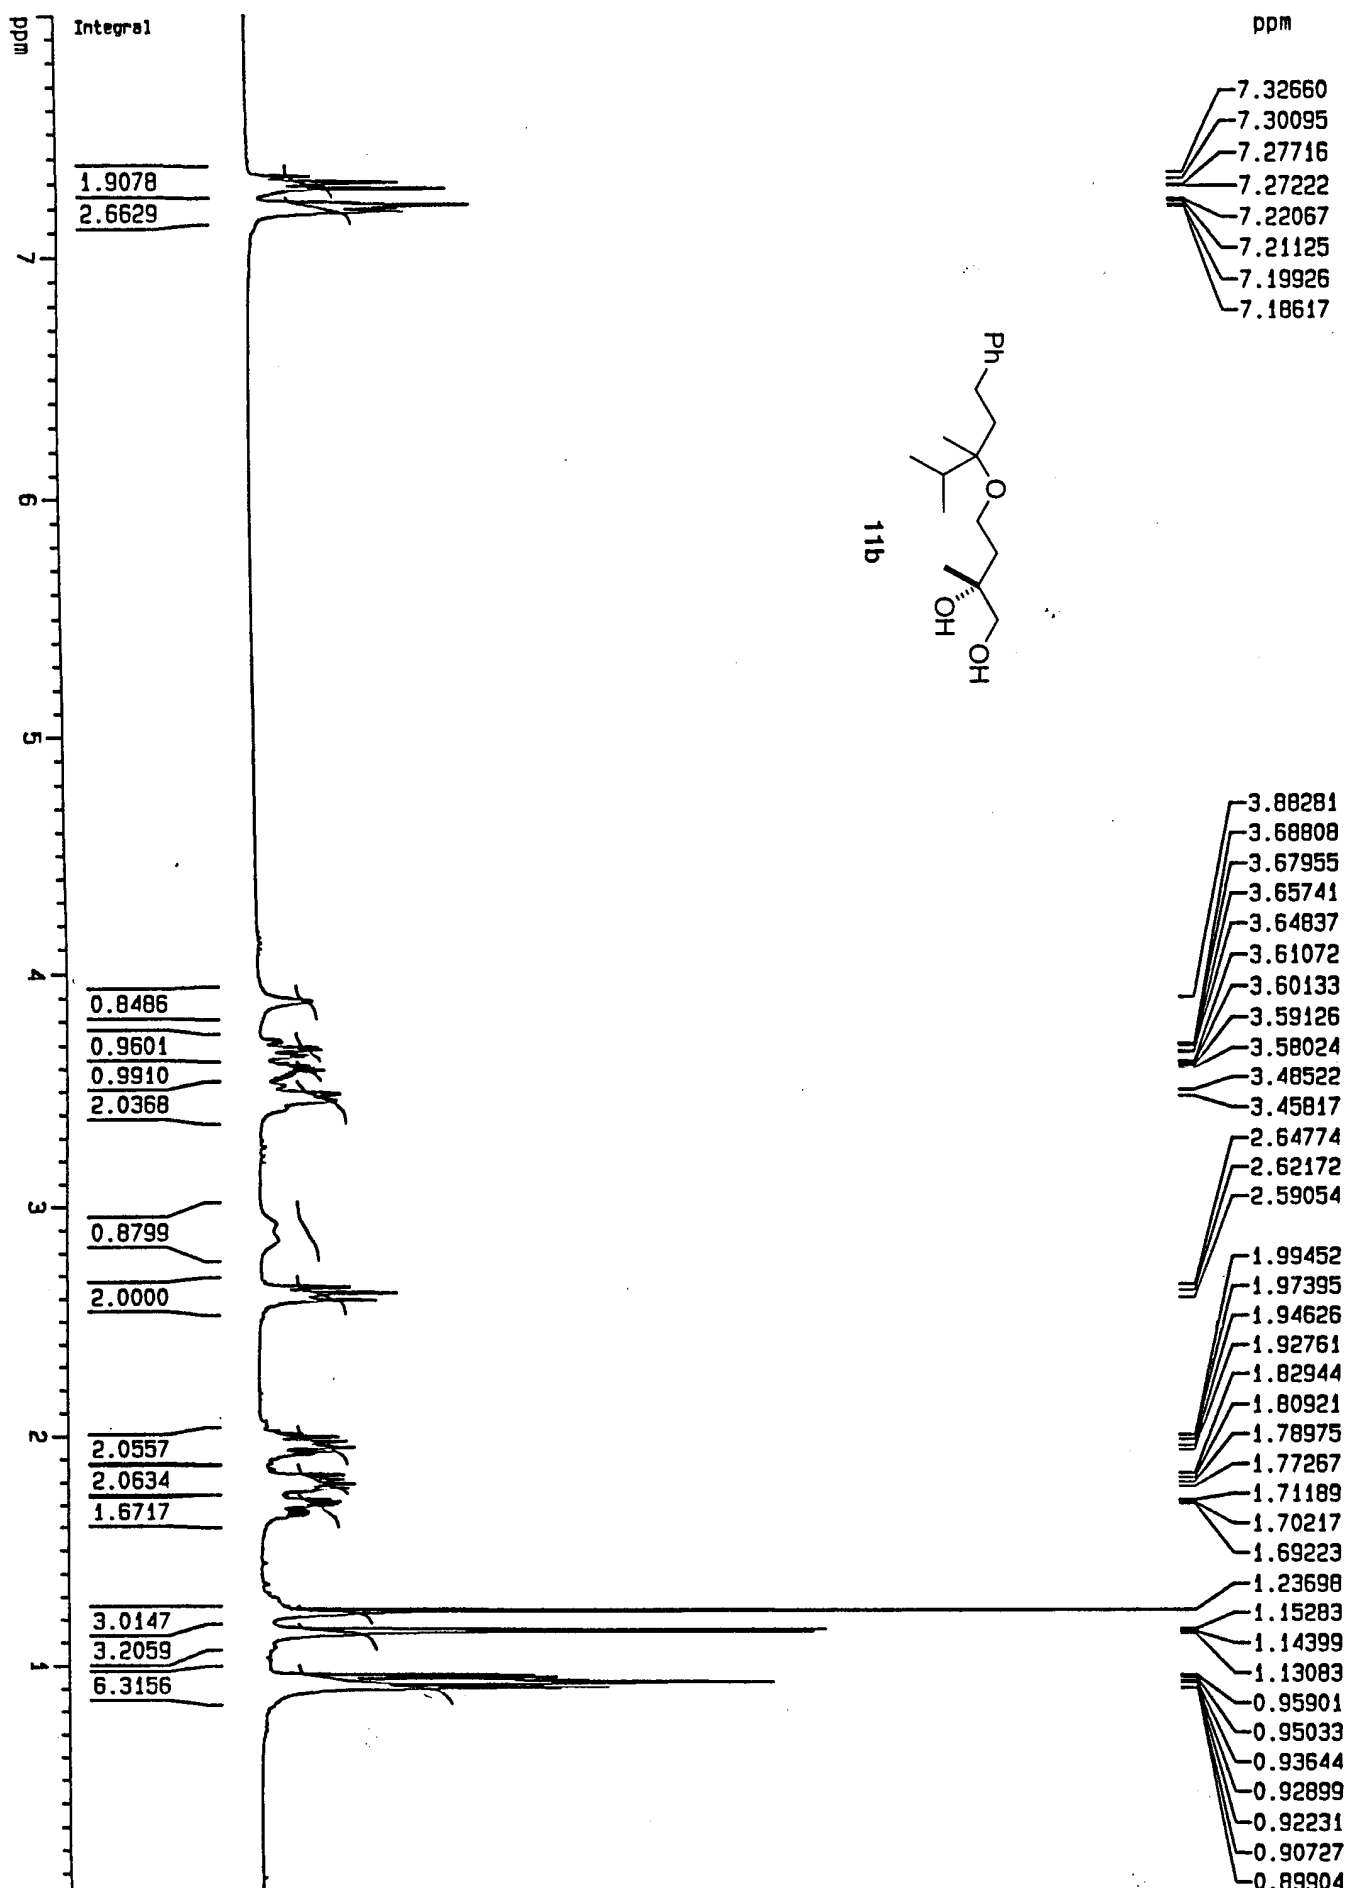

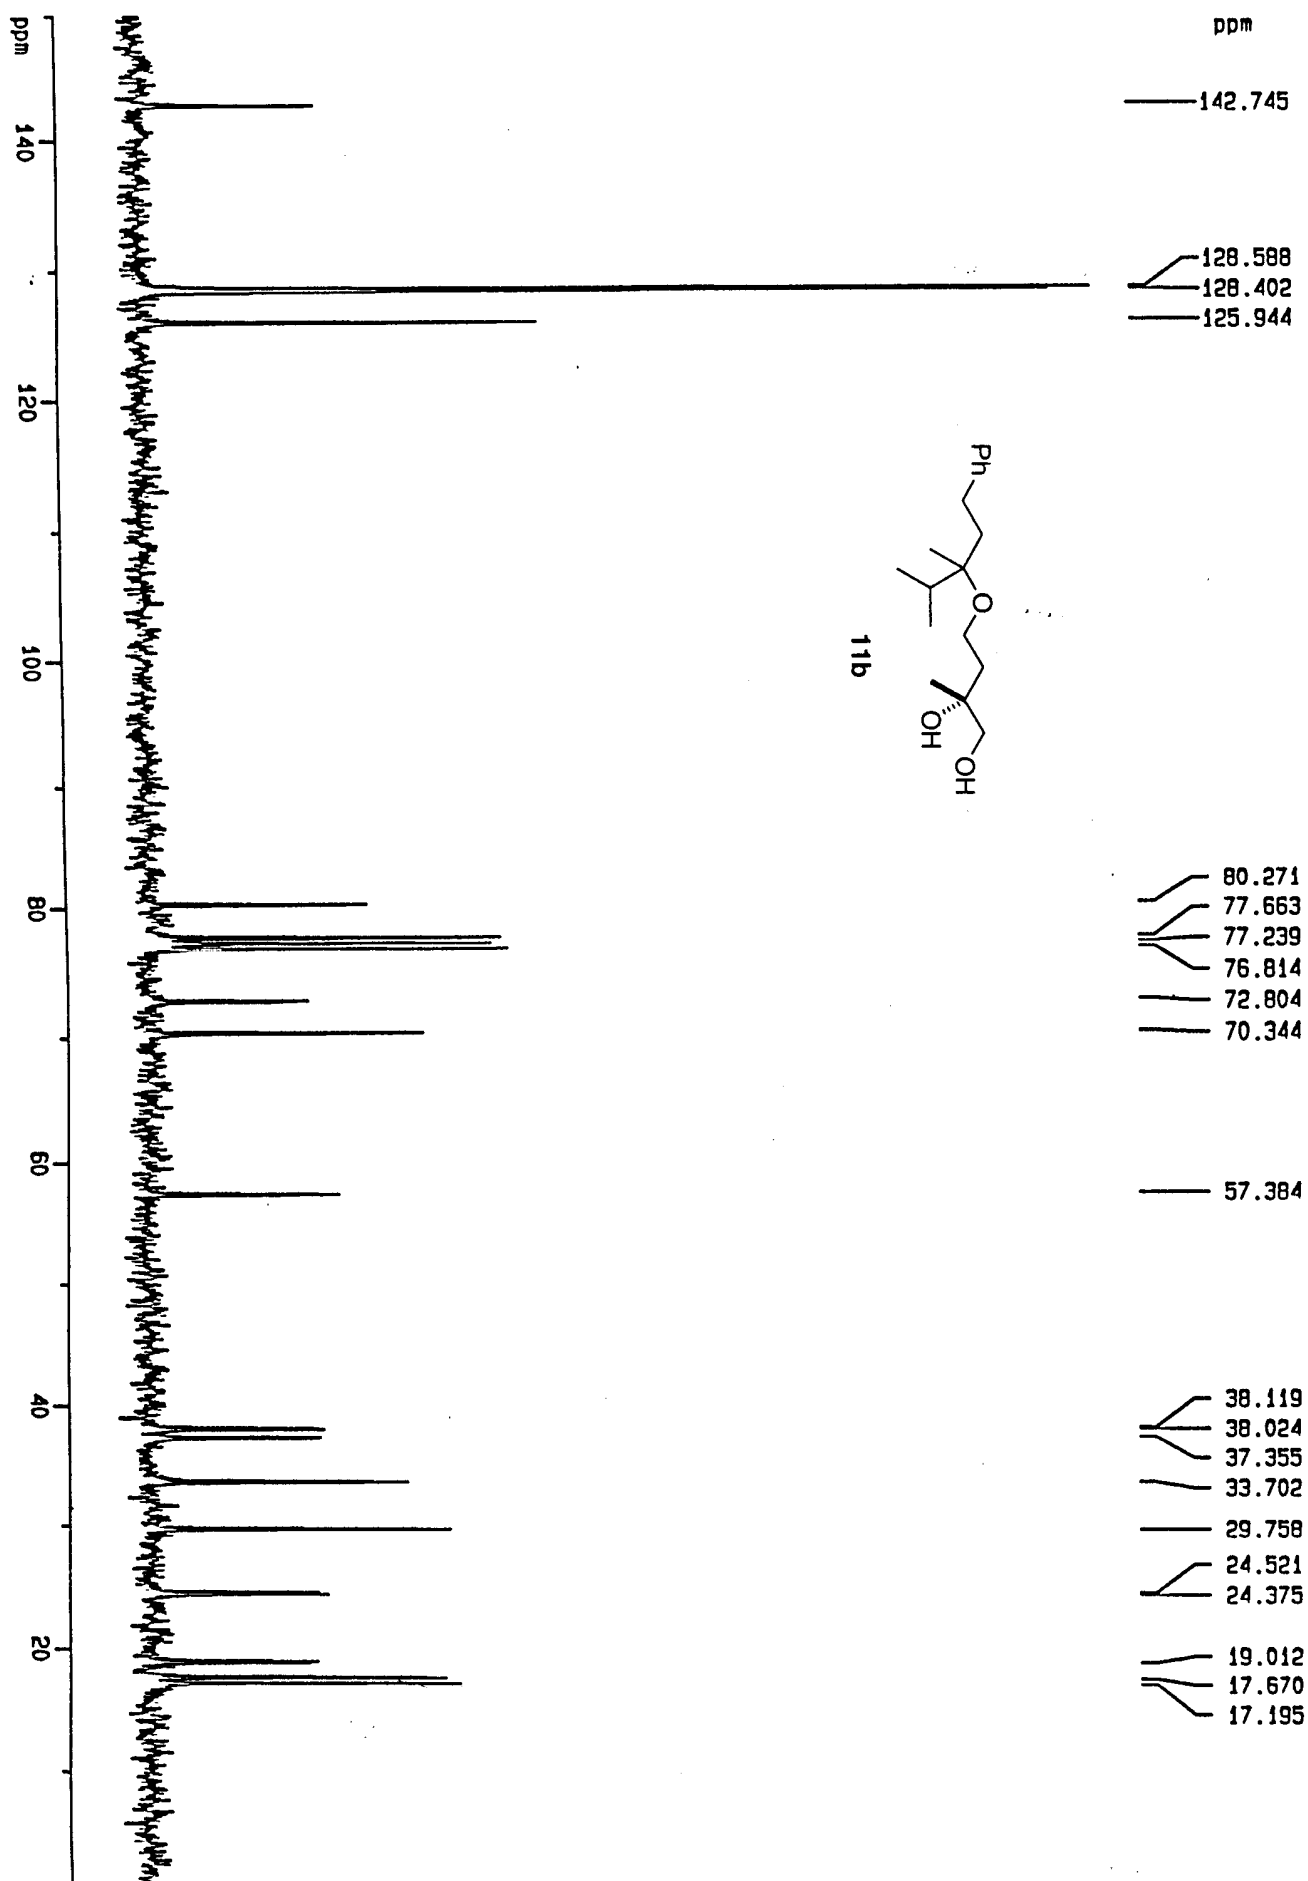

ppm

7.44531  
7.43785  
7.41695  
7.39259  
7.36588  
7.31989  
7.31329  
7.29795  
7.27486  
7.25009  
7.20050  
7.19761  
7.17711  
7.16885  
7.15152  
7.12710

3.91649  
3.82282  
3.80757  
3.24299  
3.21436  
3.18949  
3.16064  
3.13350  
3.10346  
3.09767  
3.06903  
2.55206  
2.54459  
2.52369  
2.50043  
2.17481  
2.14736  
2.11836  
1.93835  
1.92466  
1.91139  
1.90331  
1.71103  
1.69931  
1.69022  
1.66121  
1.29057  
1.28487

11c

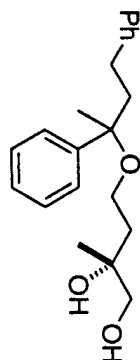

Integral

ppm  
10  
9  
8  
7  
6  
5  
4  
3  
2  
1  
0

10.000

2.409

3.297

1.210

2.477

2.478

2.036

5.068

0.305

0.334

3.954

ppm

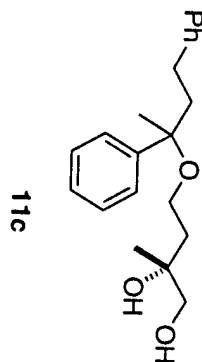

144.454  
142.160

128.300  
128.227  
128.159  
127.039  
125.965  
125.699

78.686  
77.413  
76.988  
76.564  
73.040  
69.081

59.332

44.344

39.776

30.311  
24.677  
24.544  
23.514

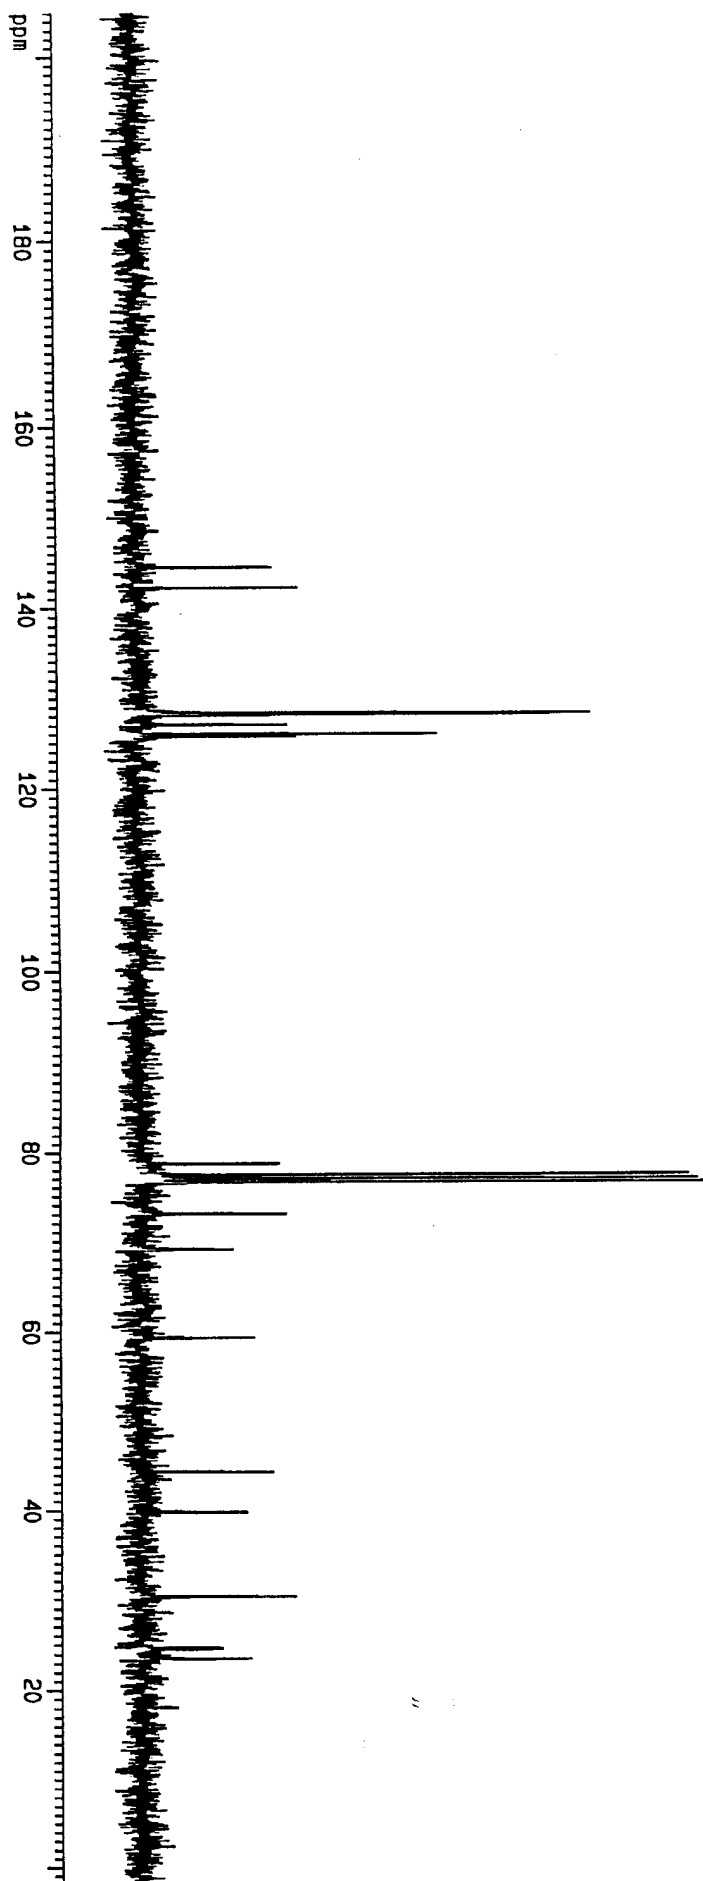

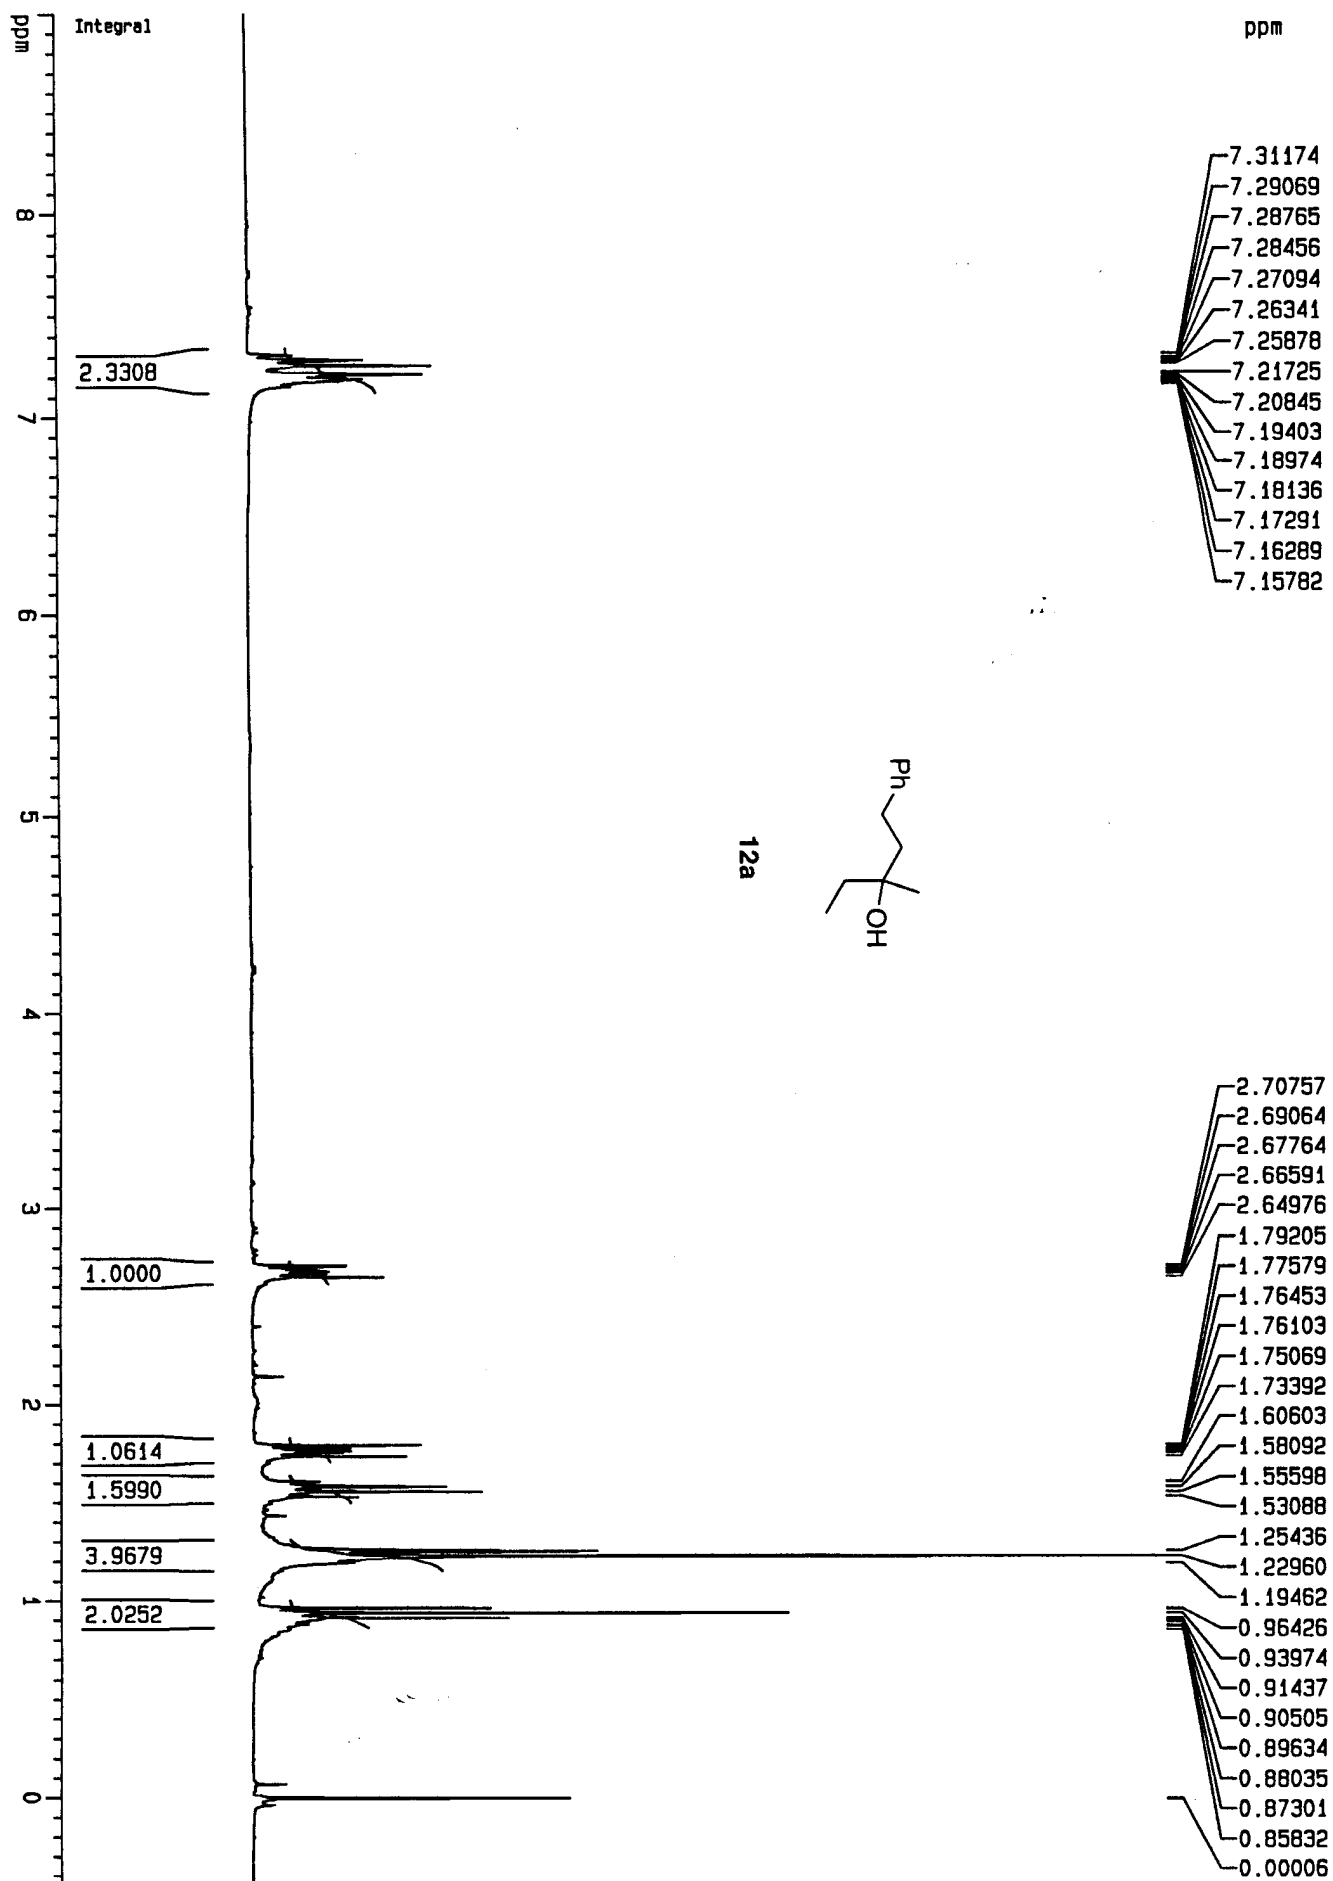

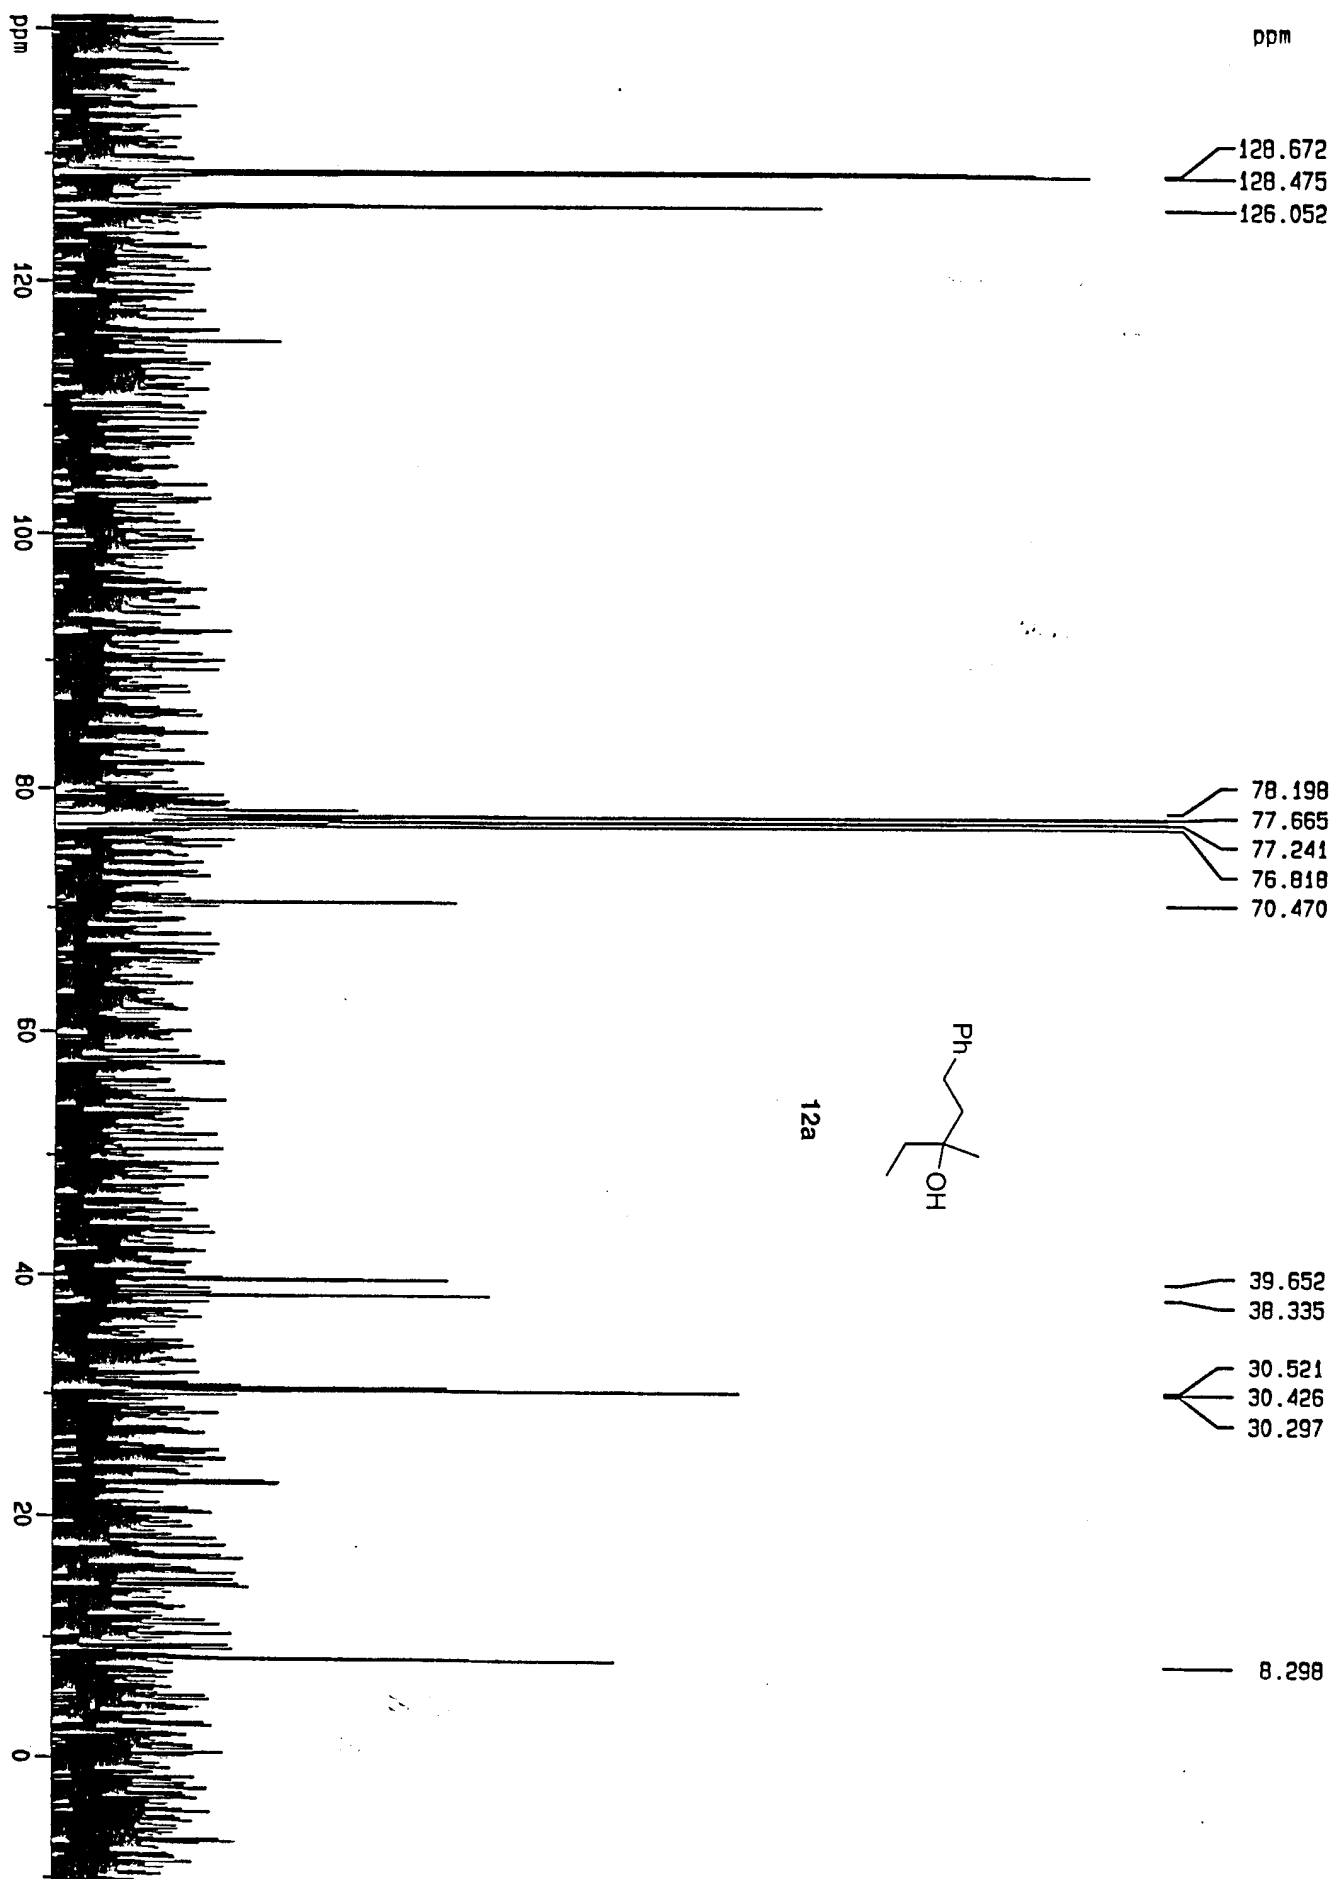

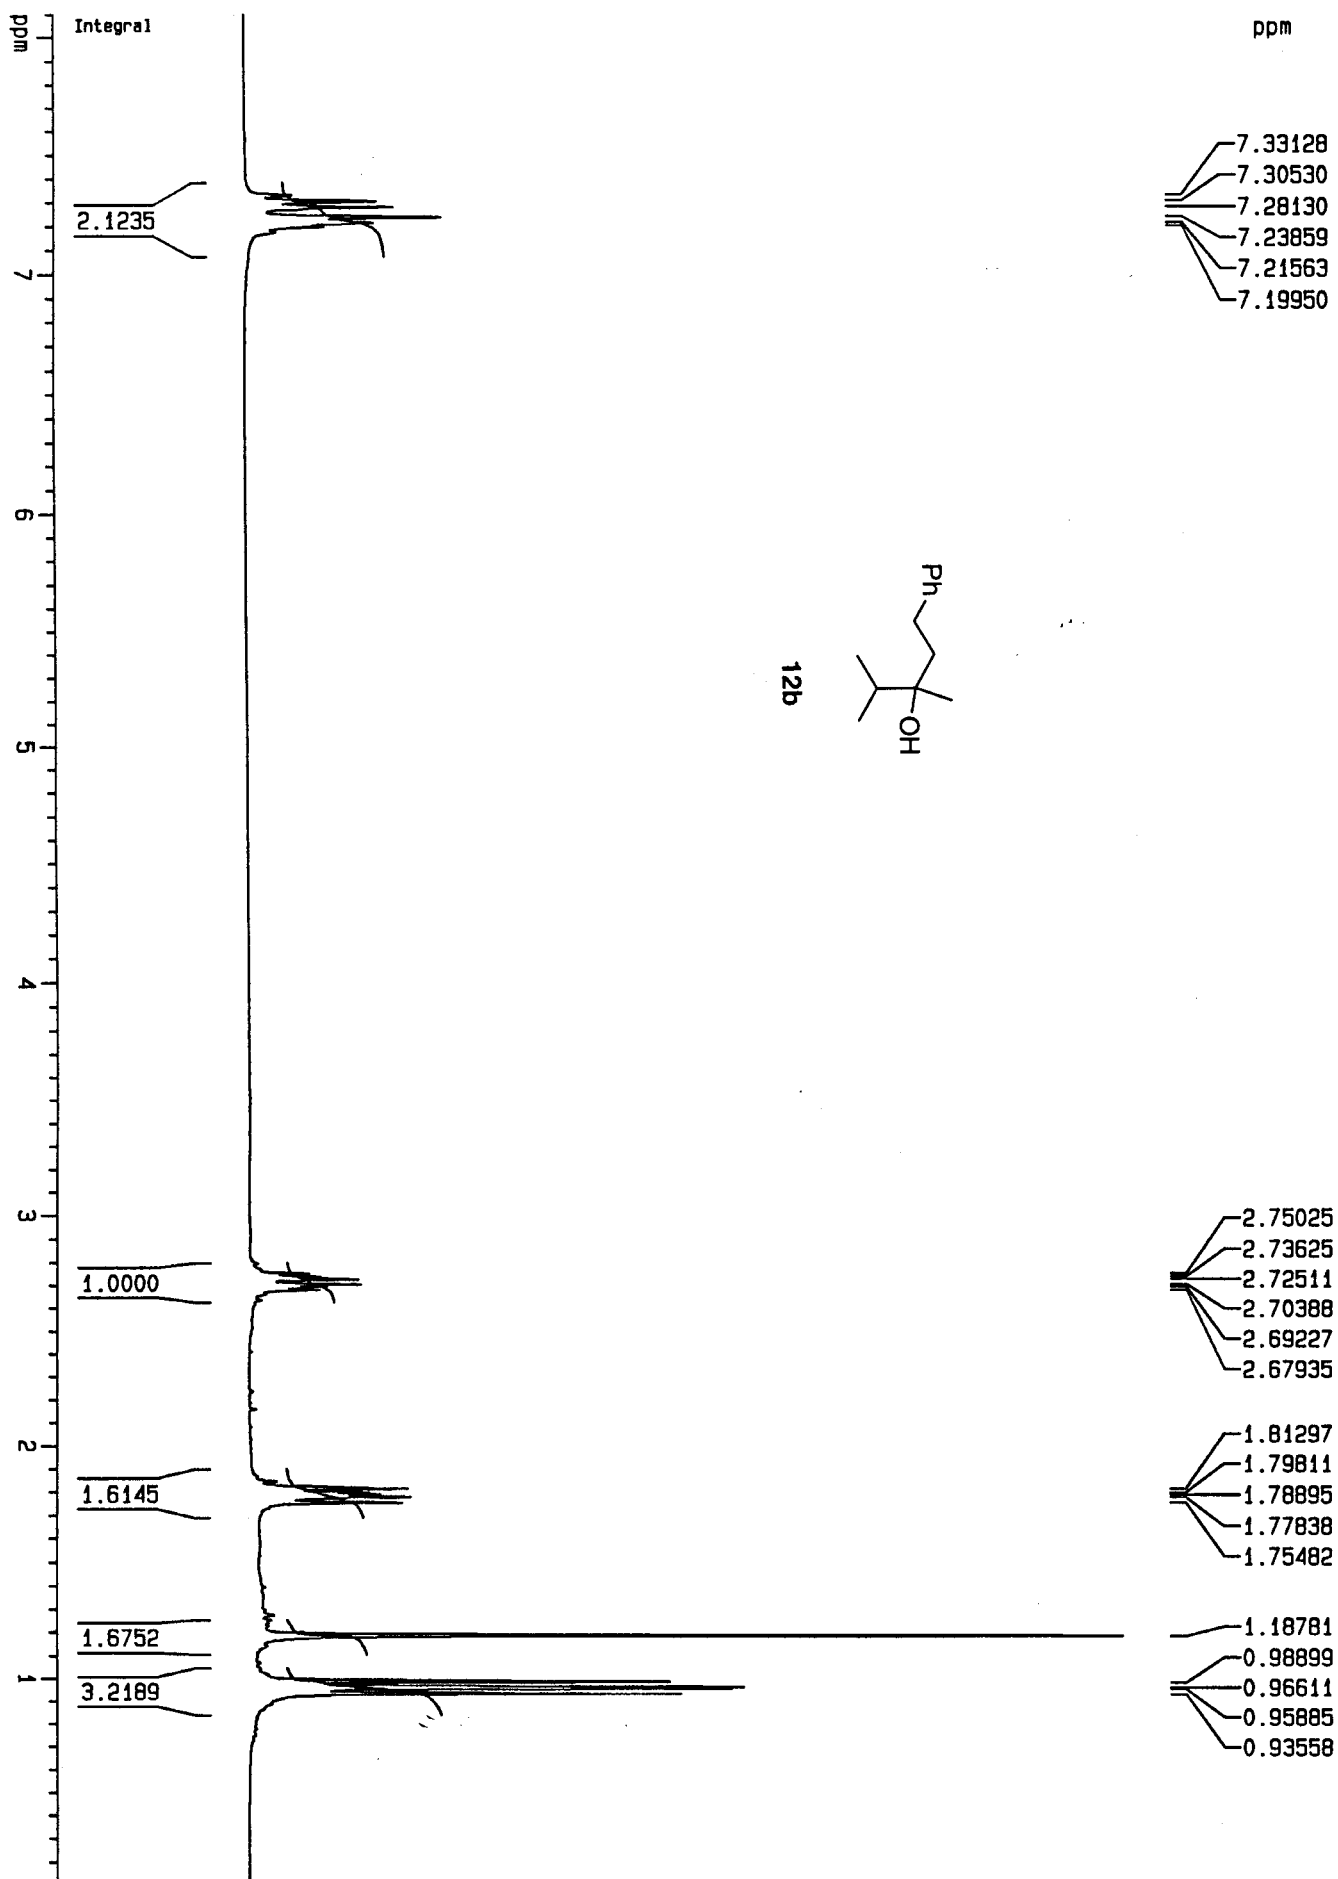

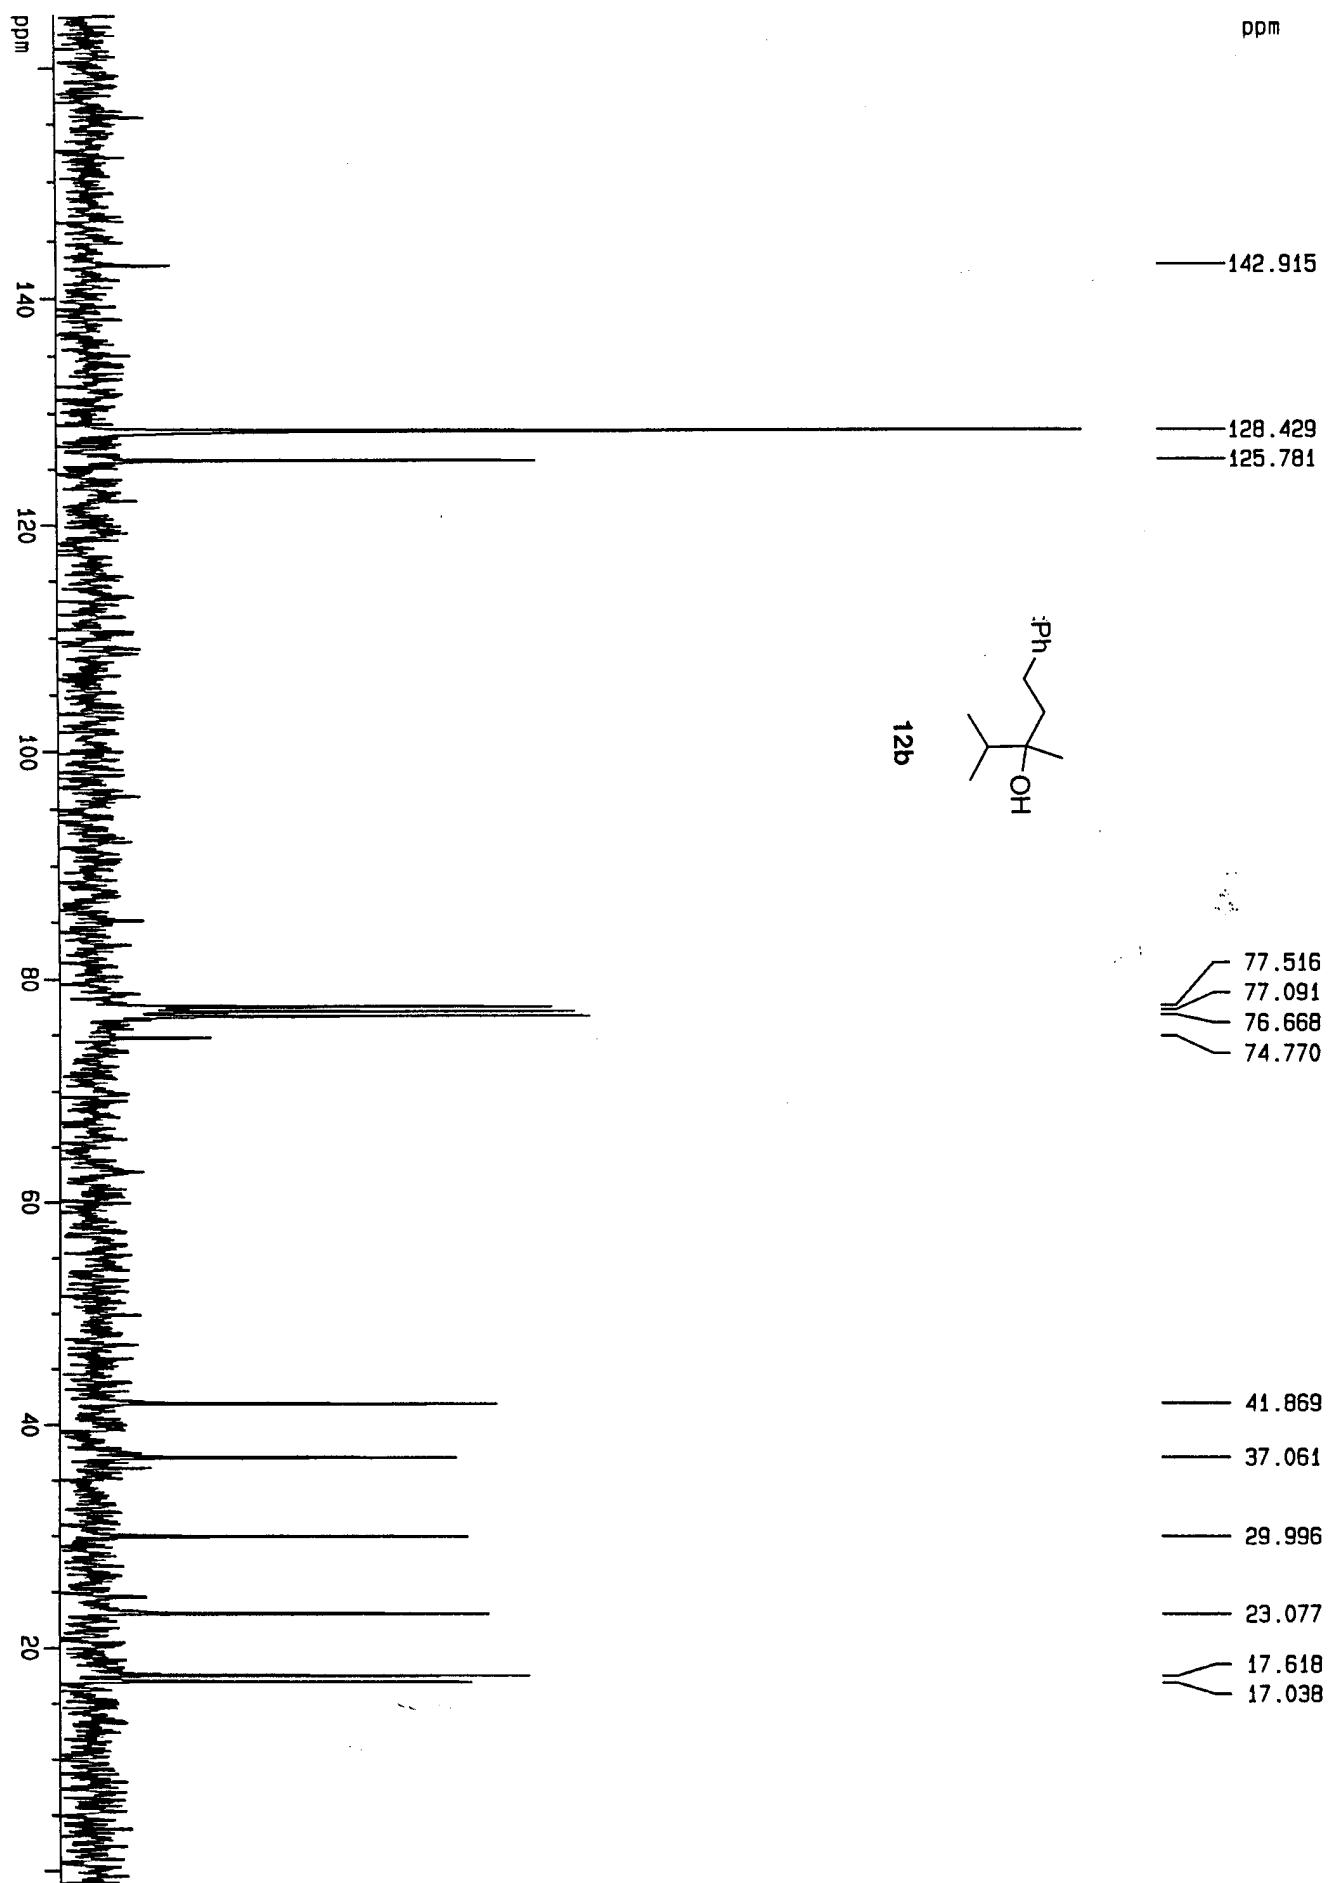



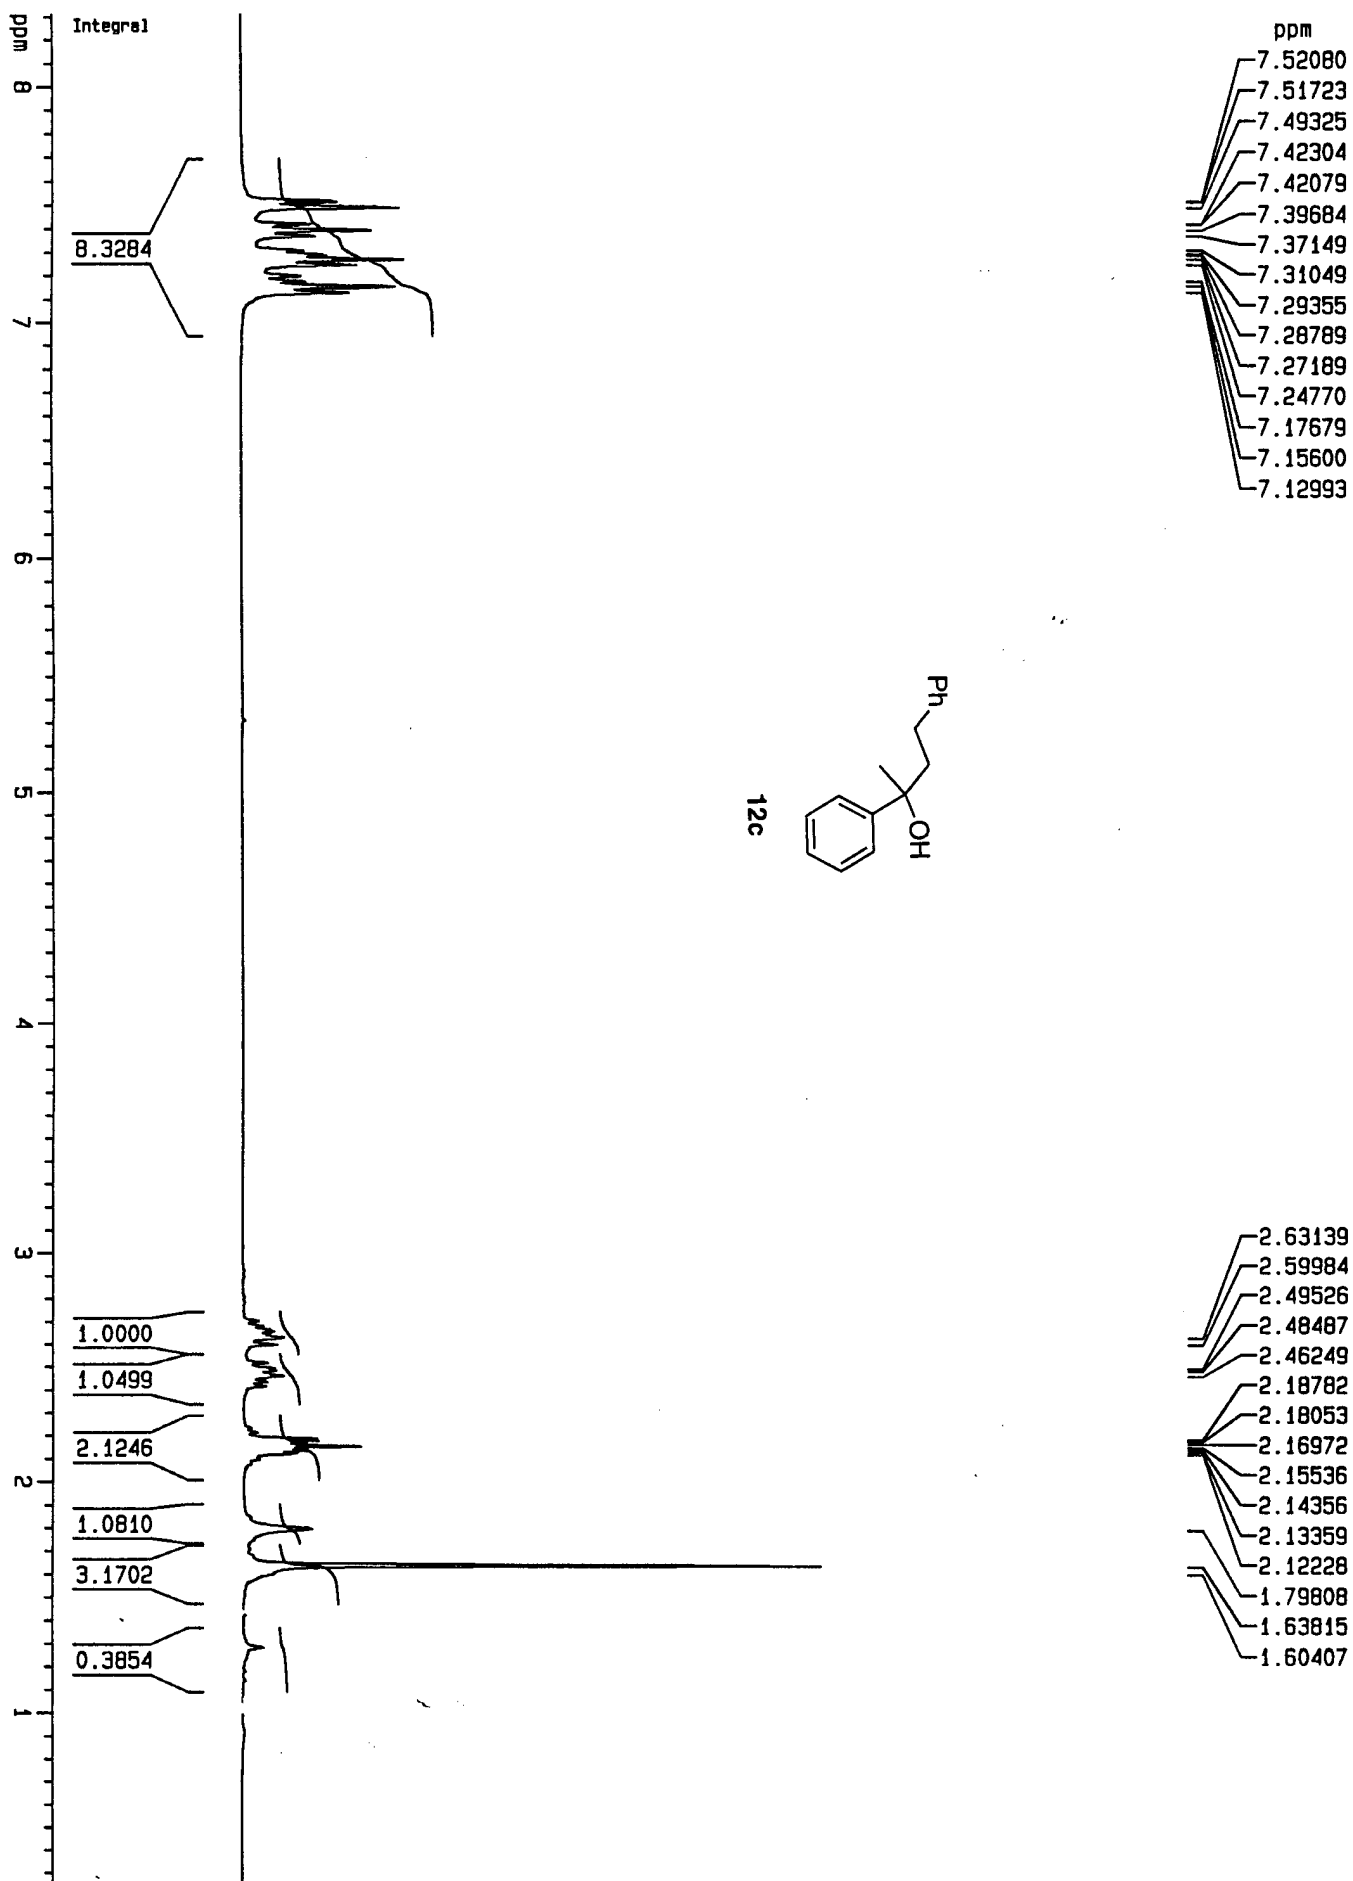

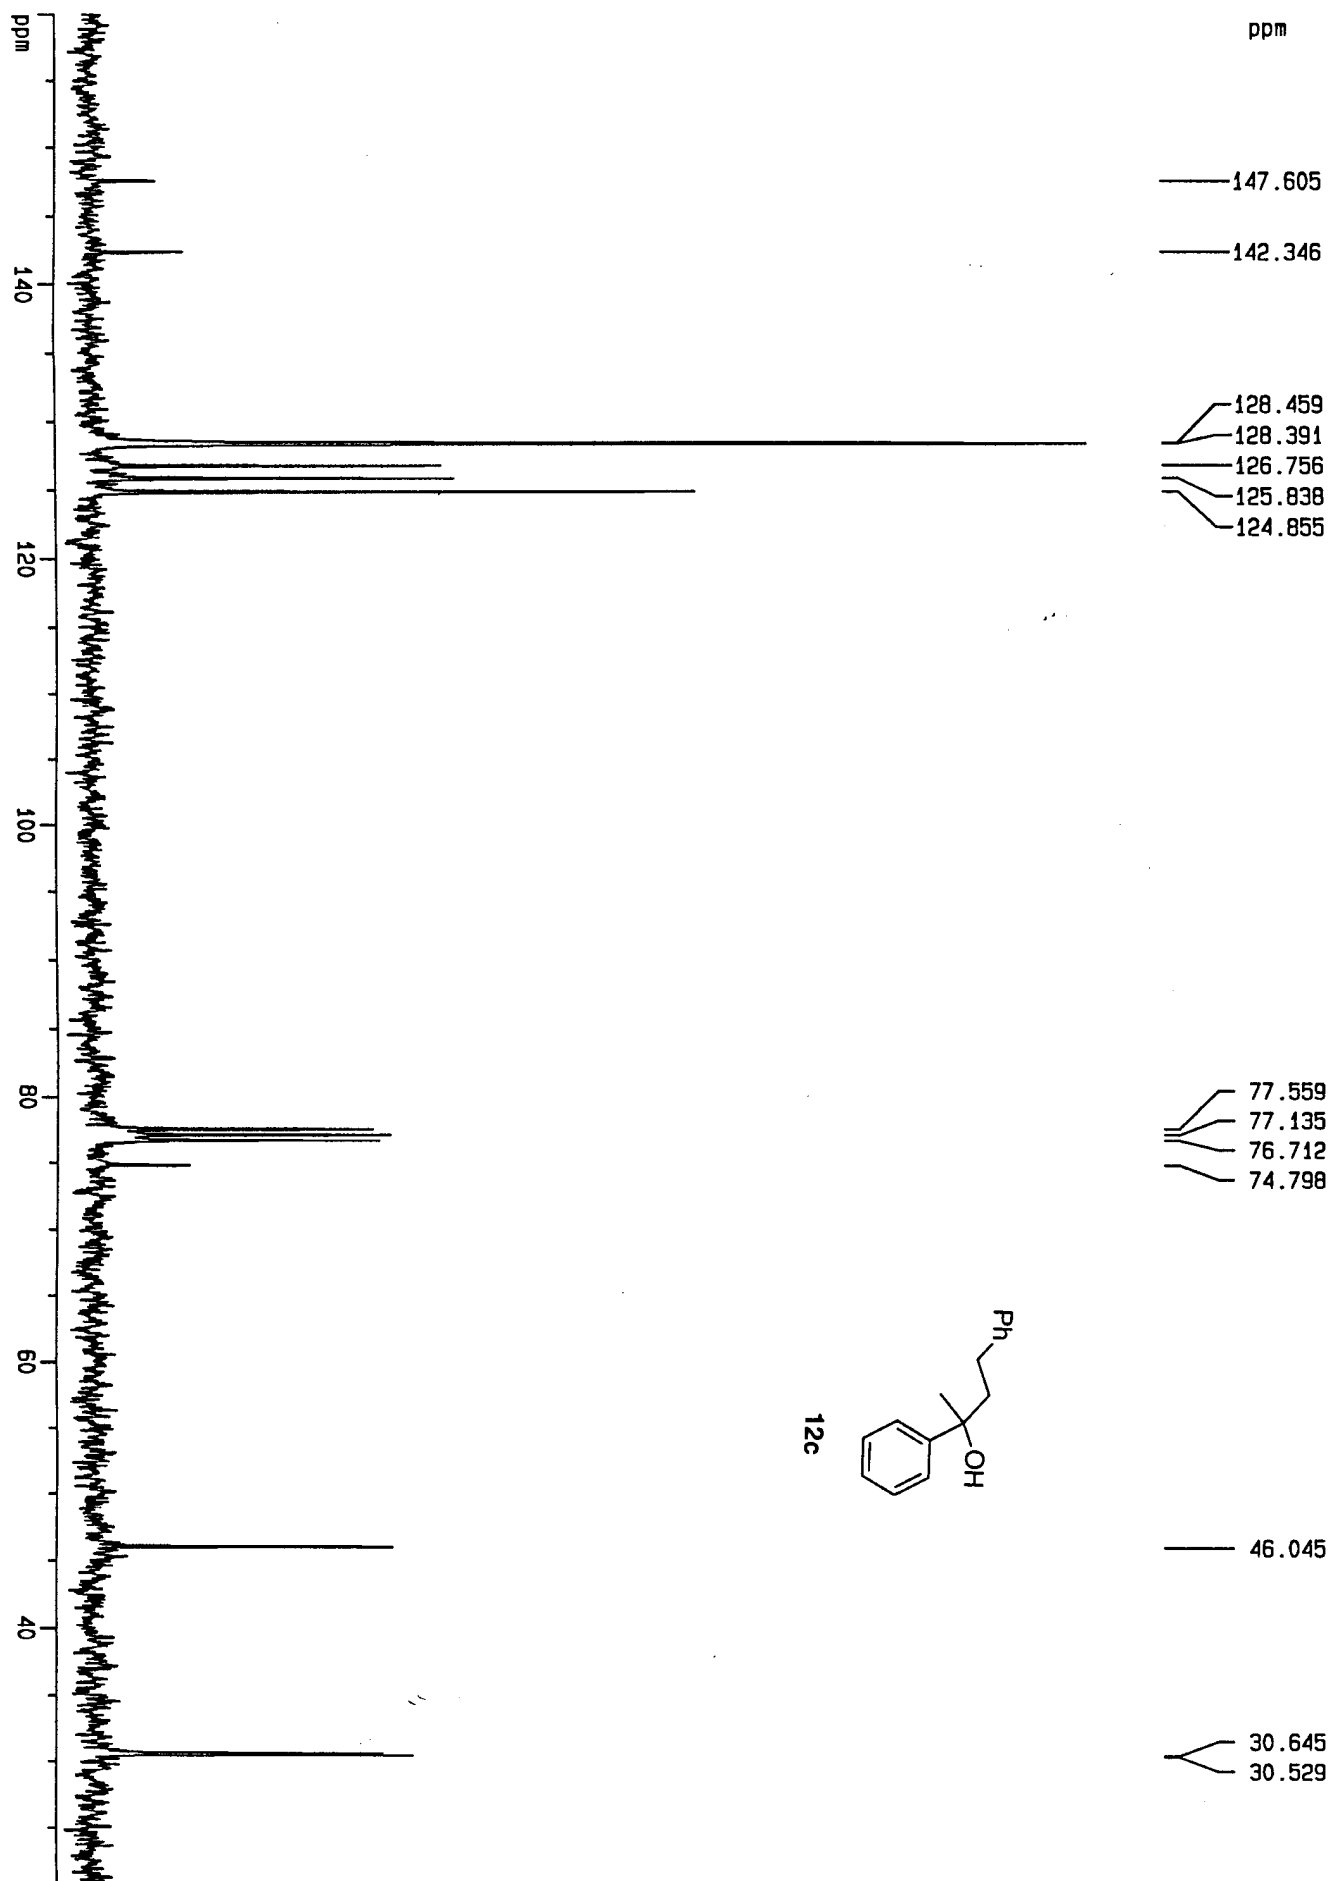

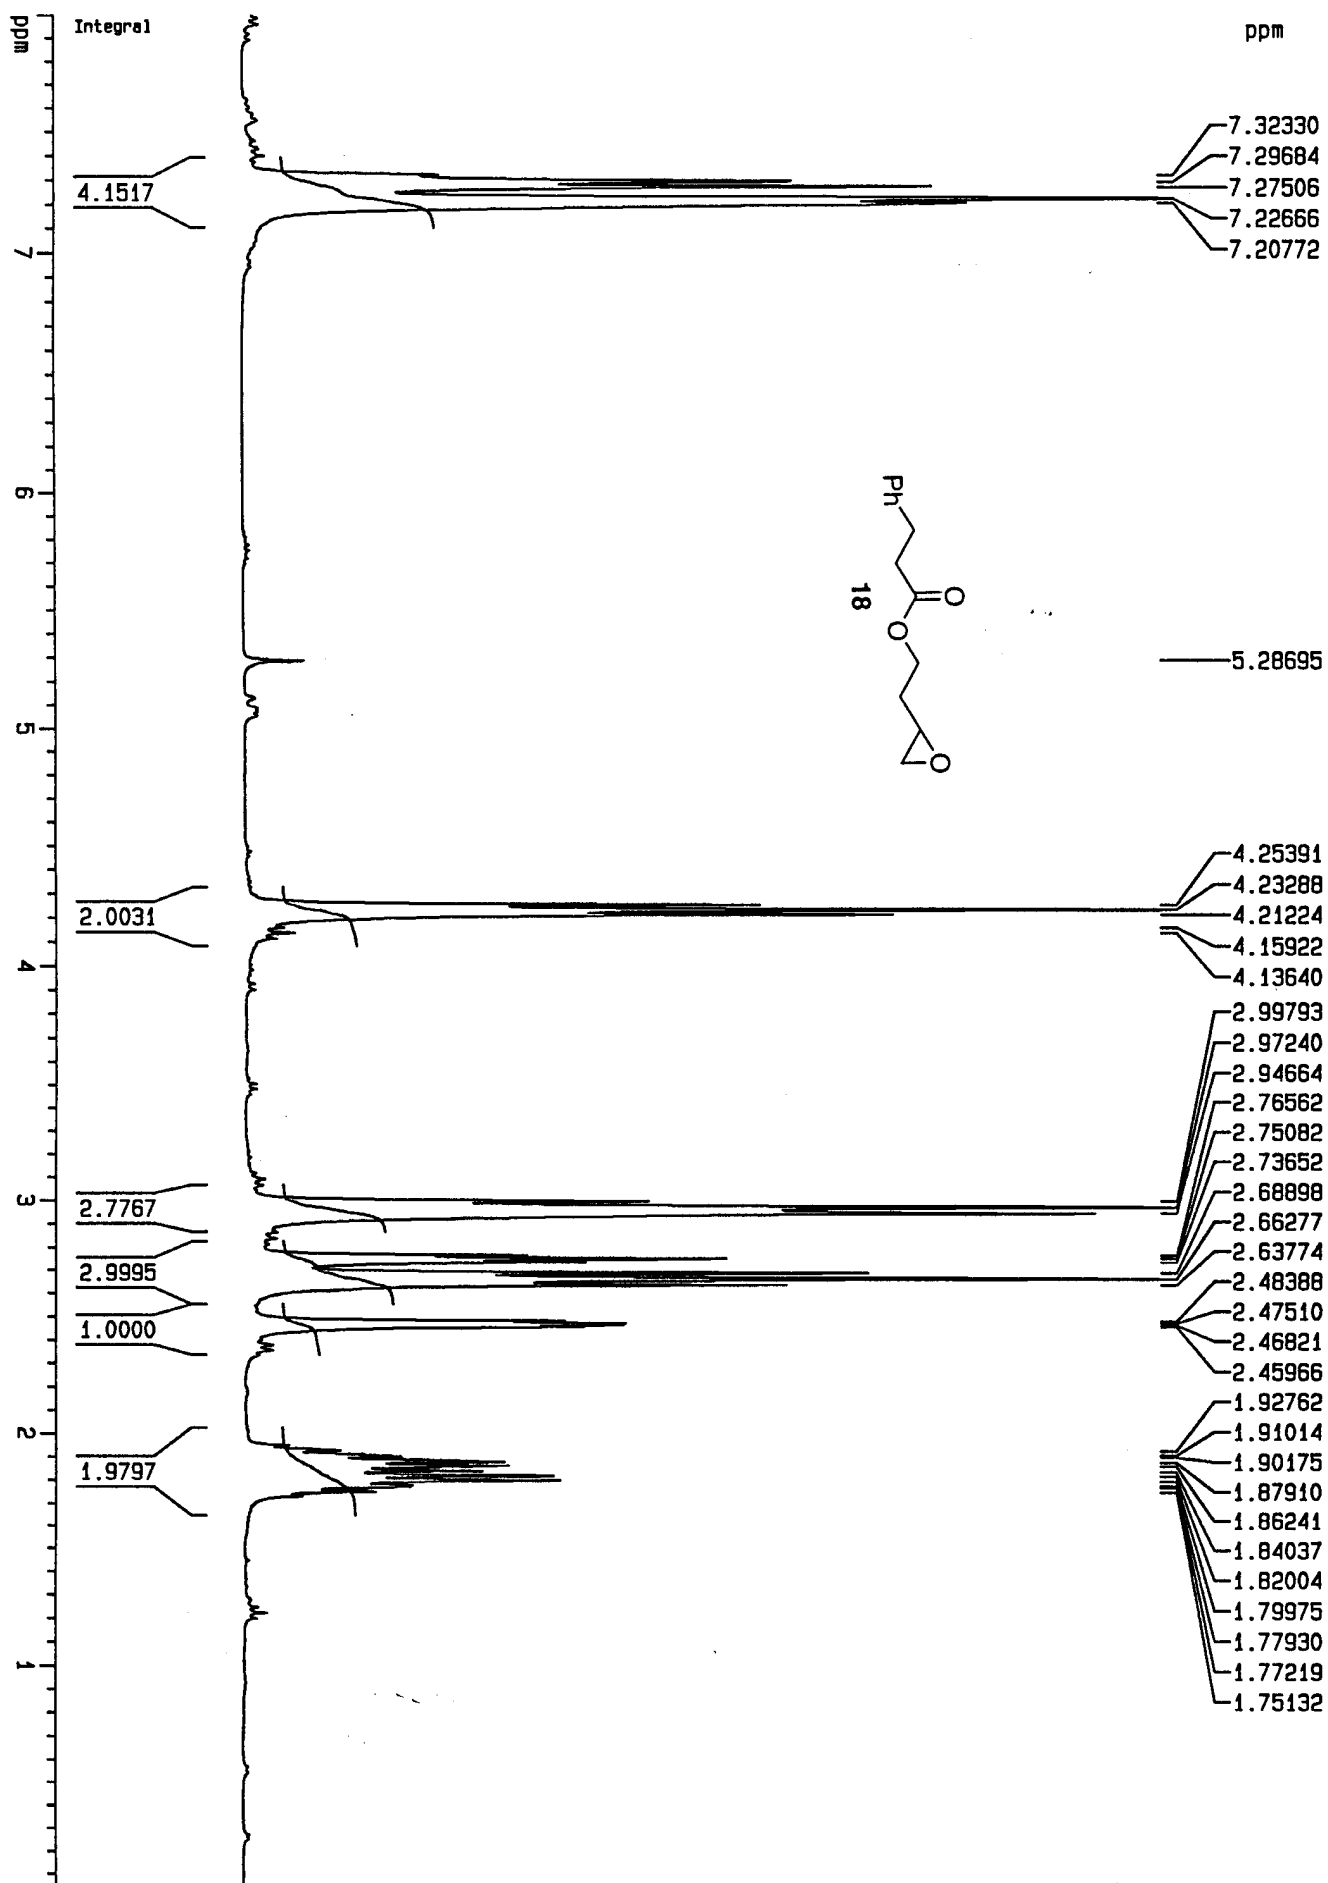

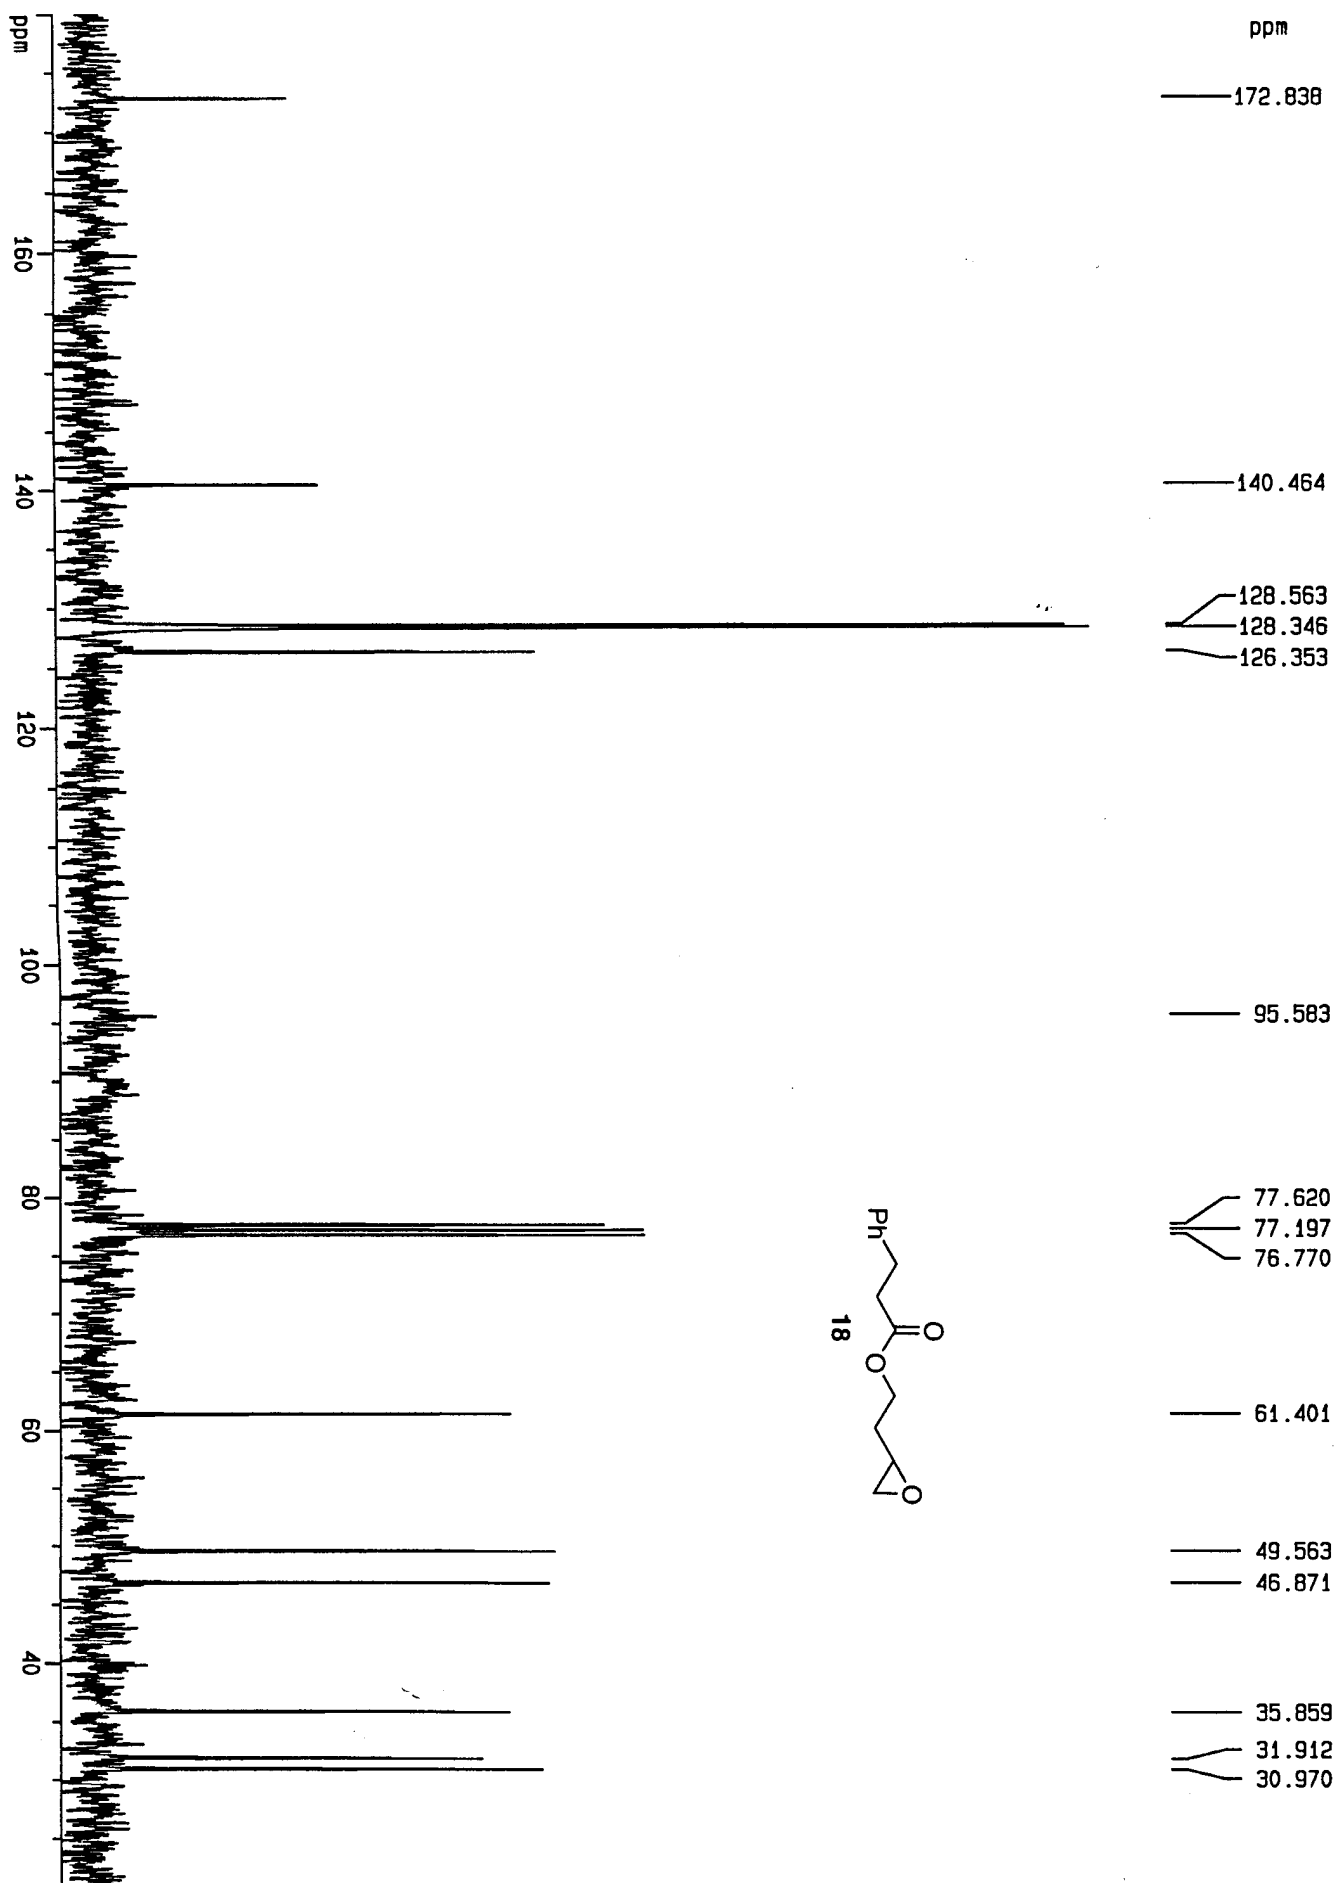

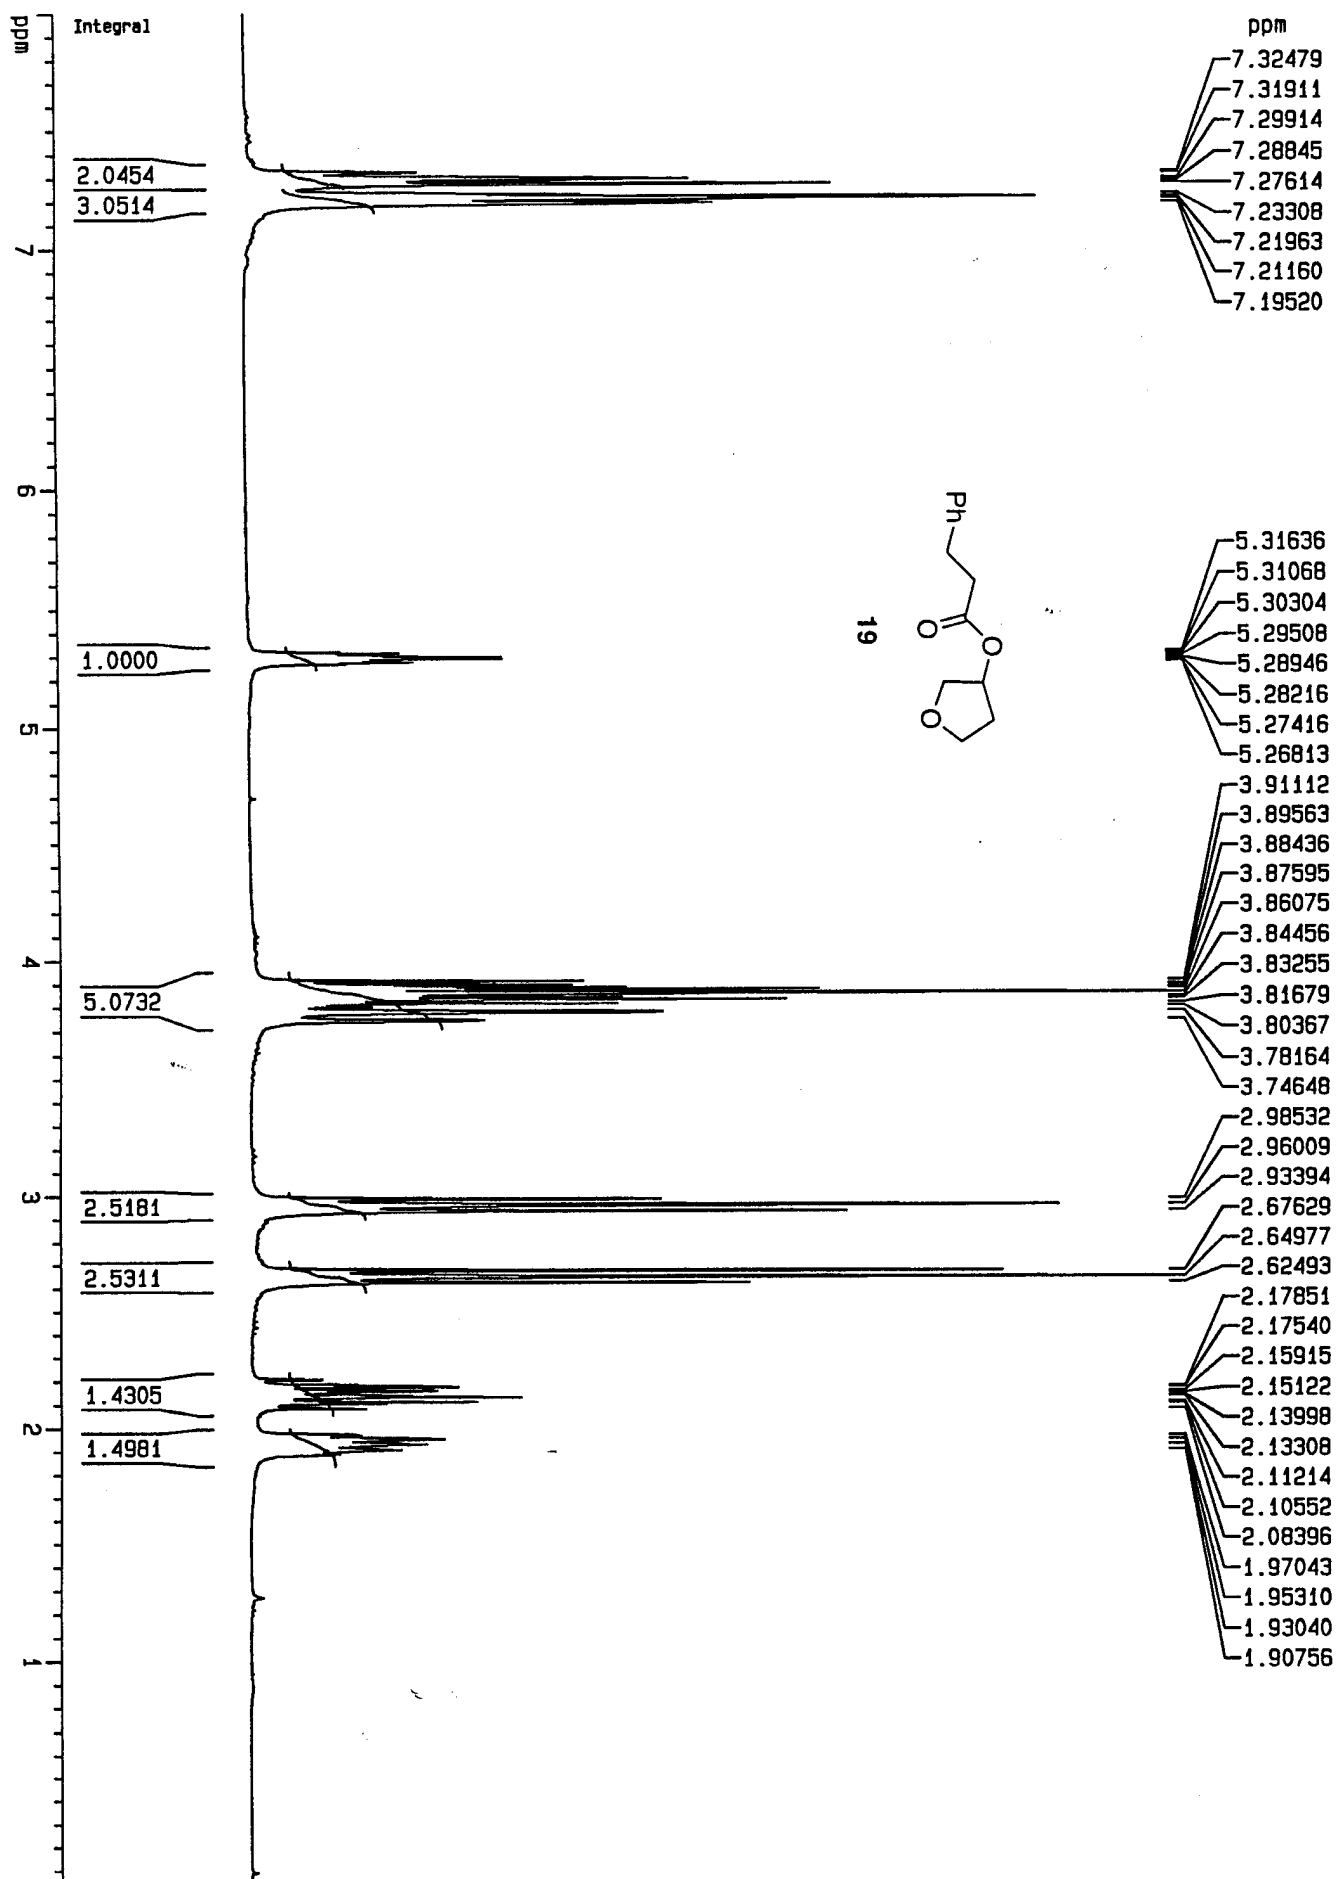

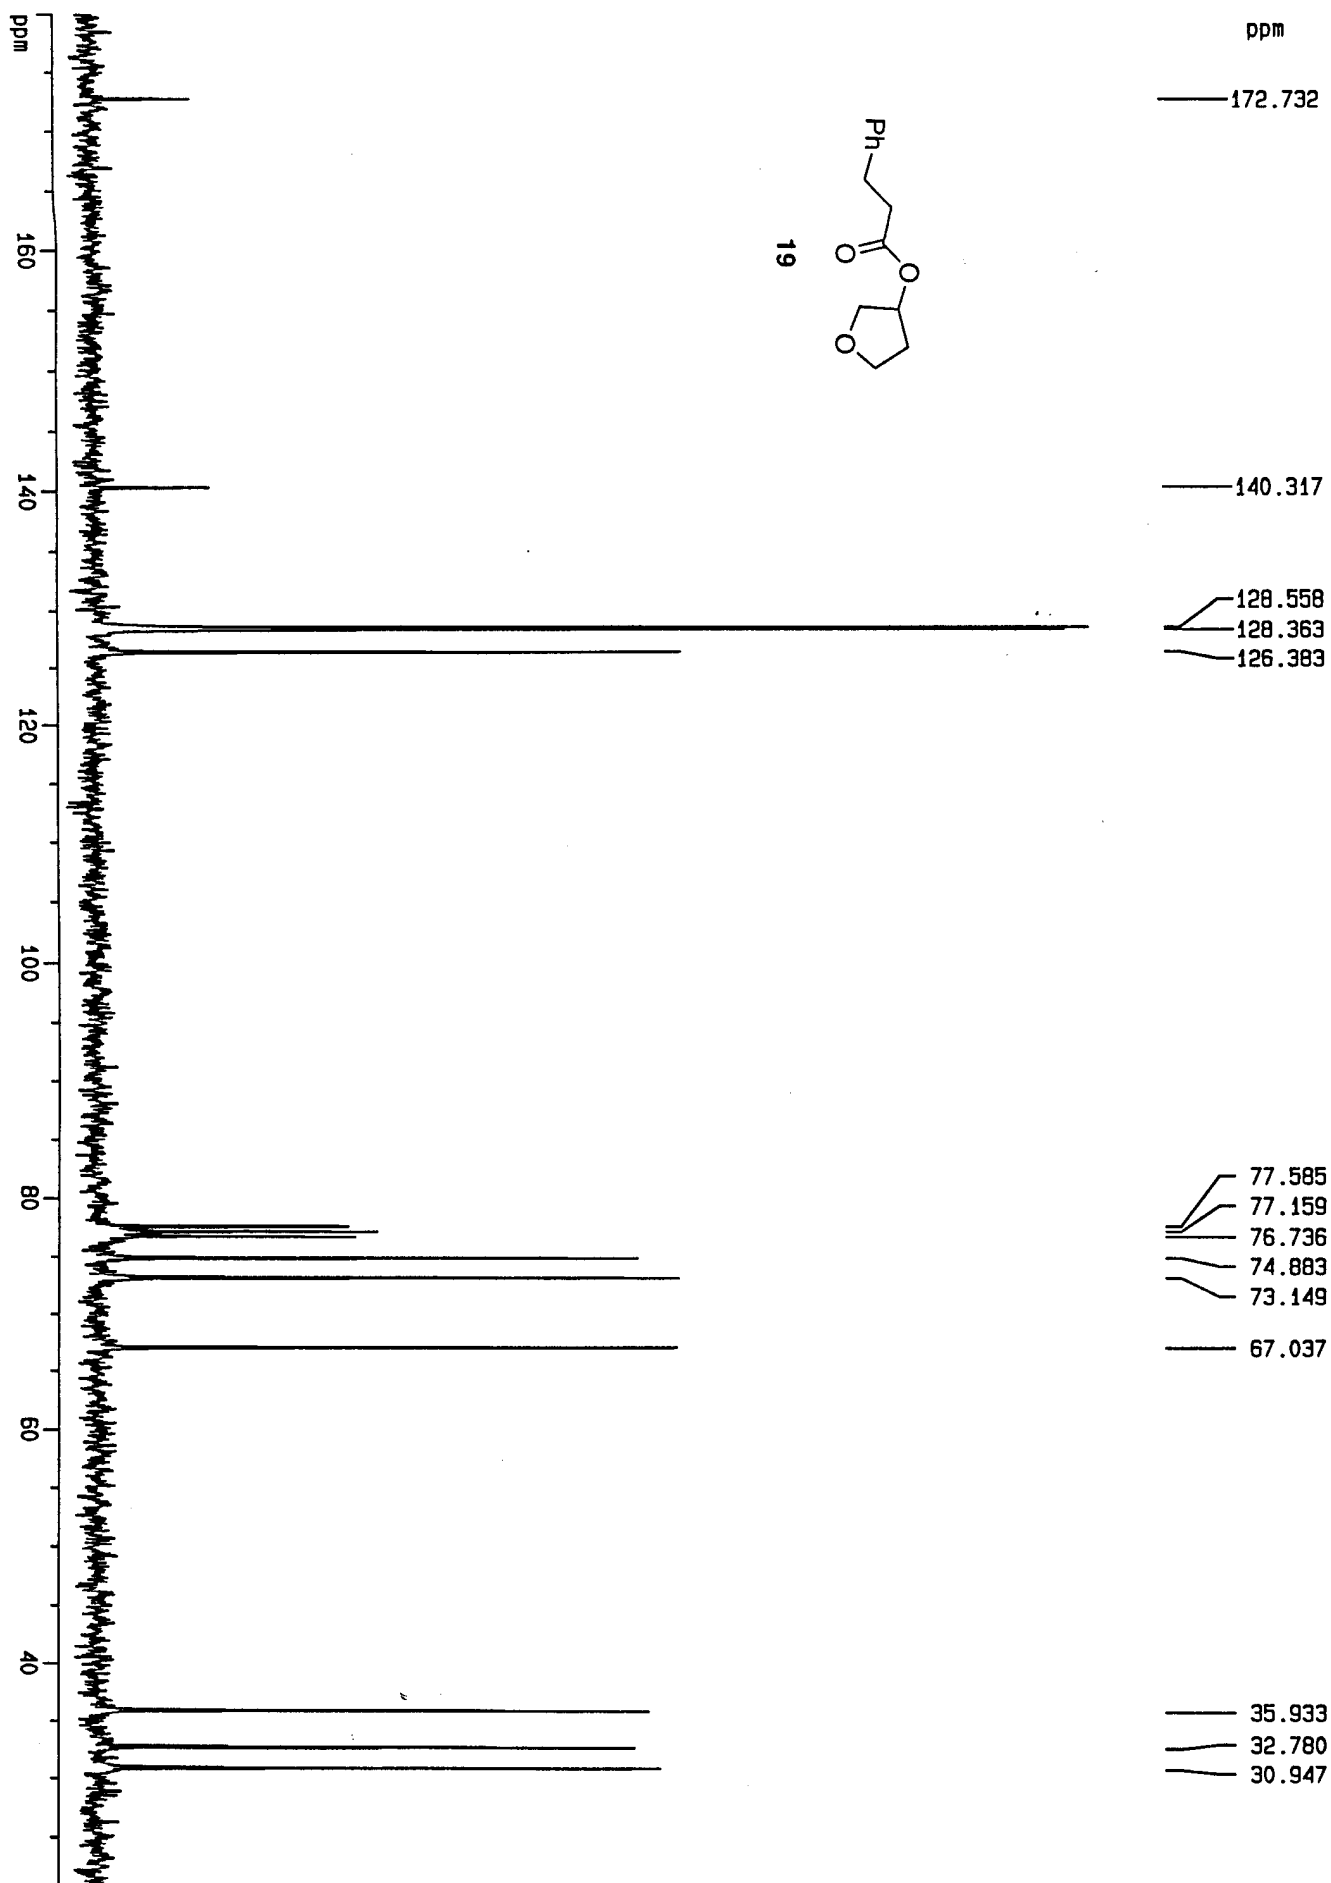

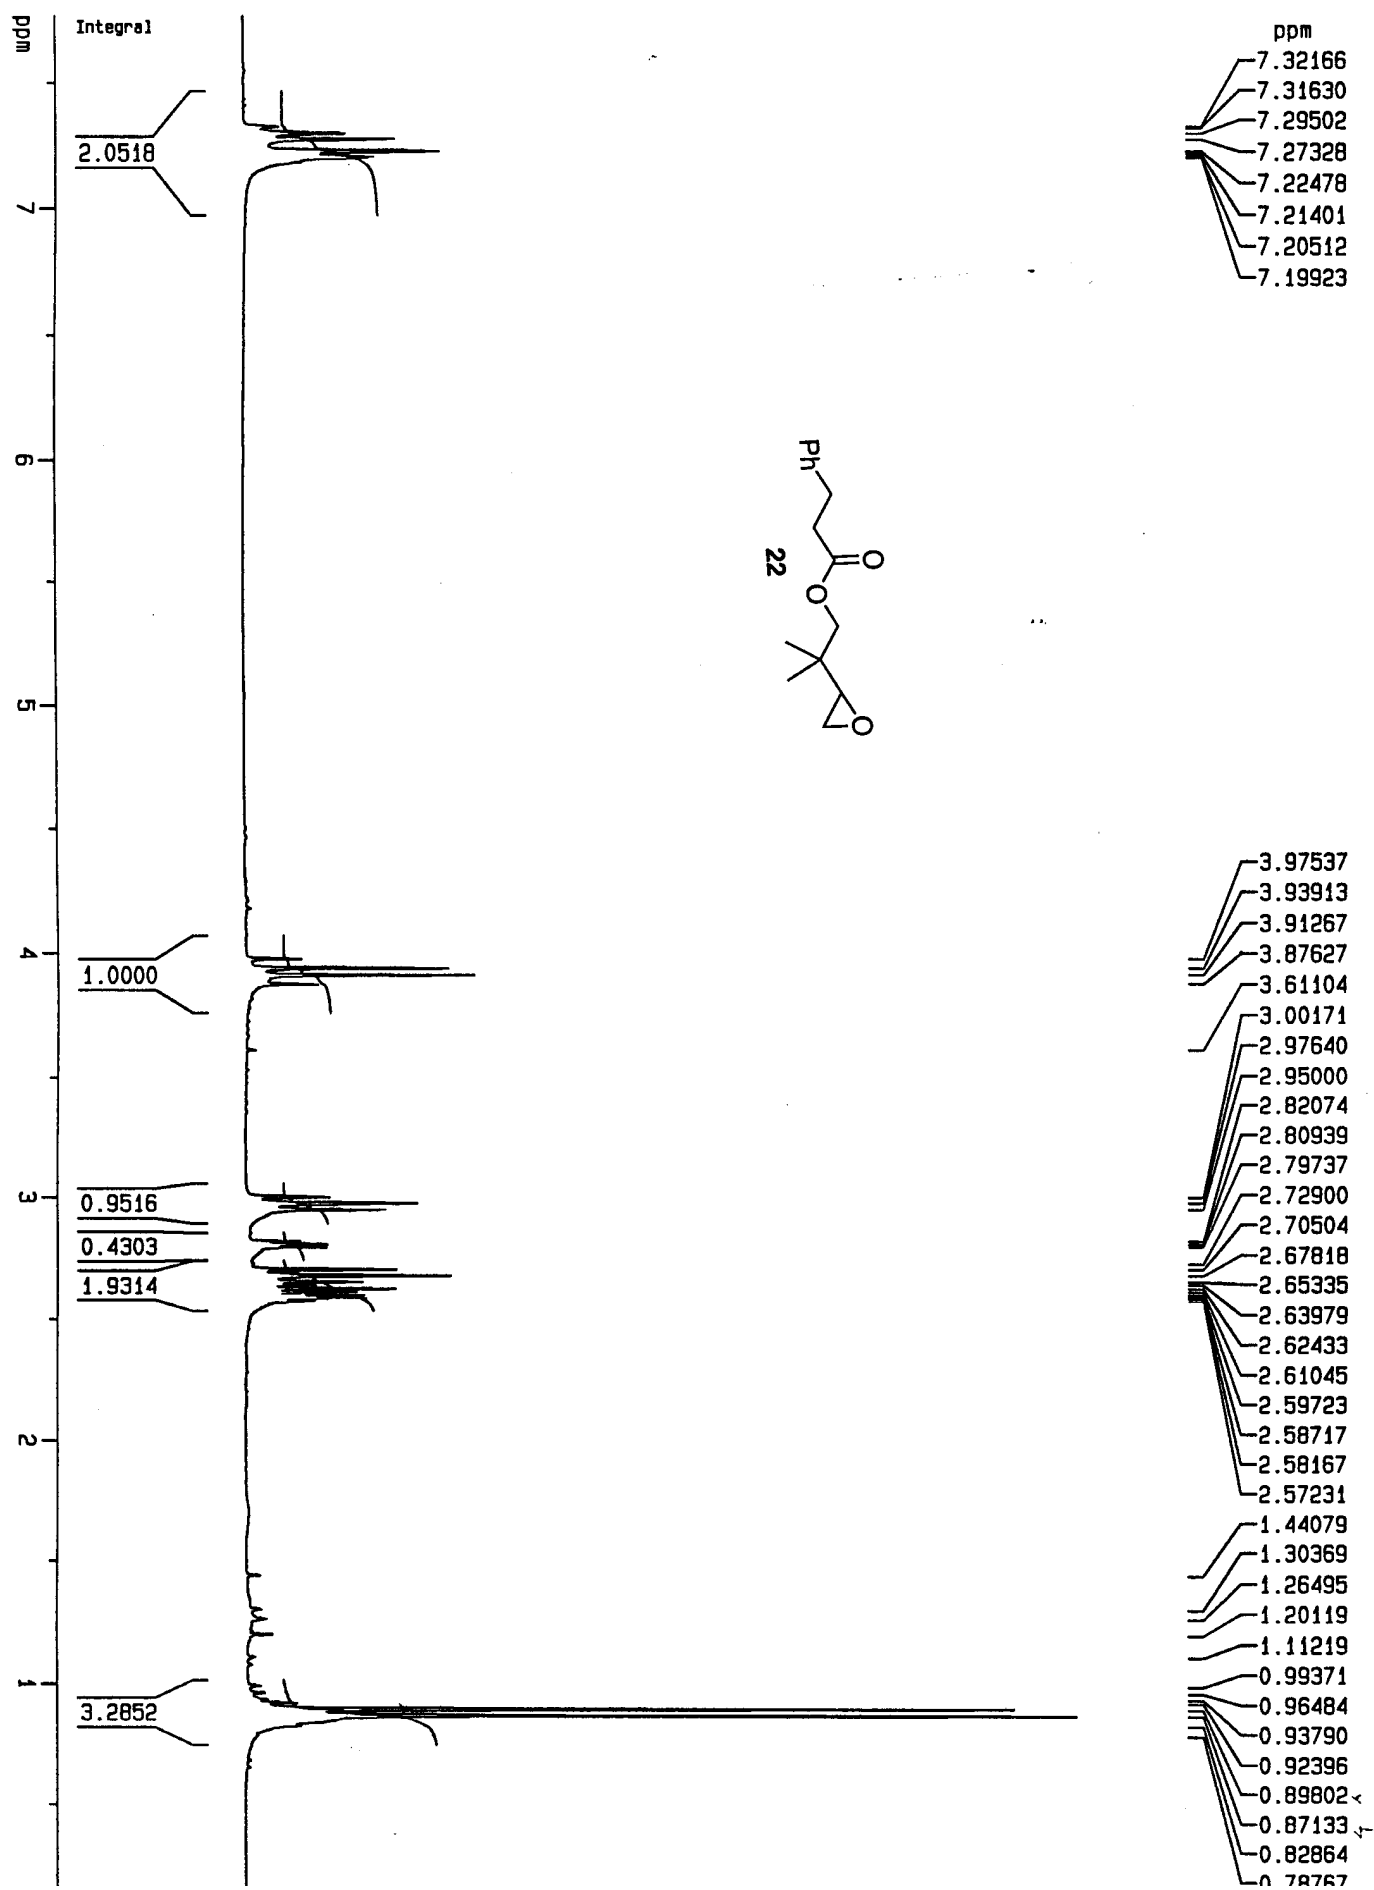

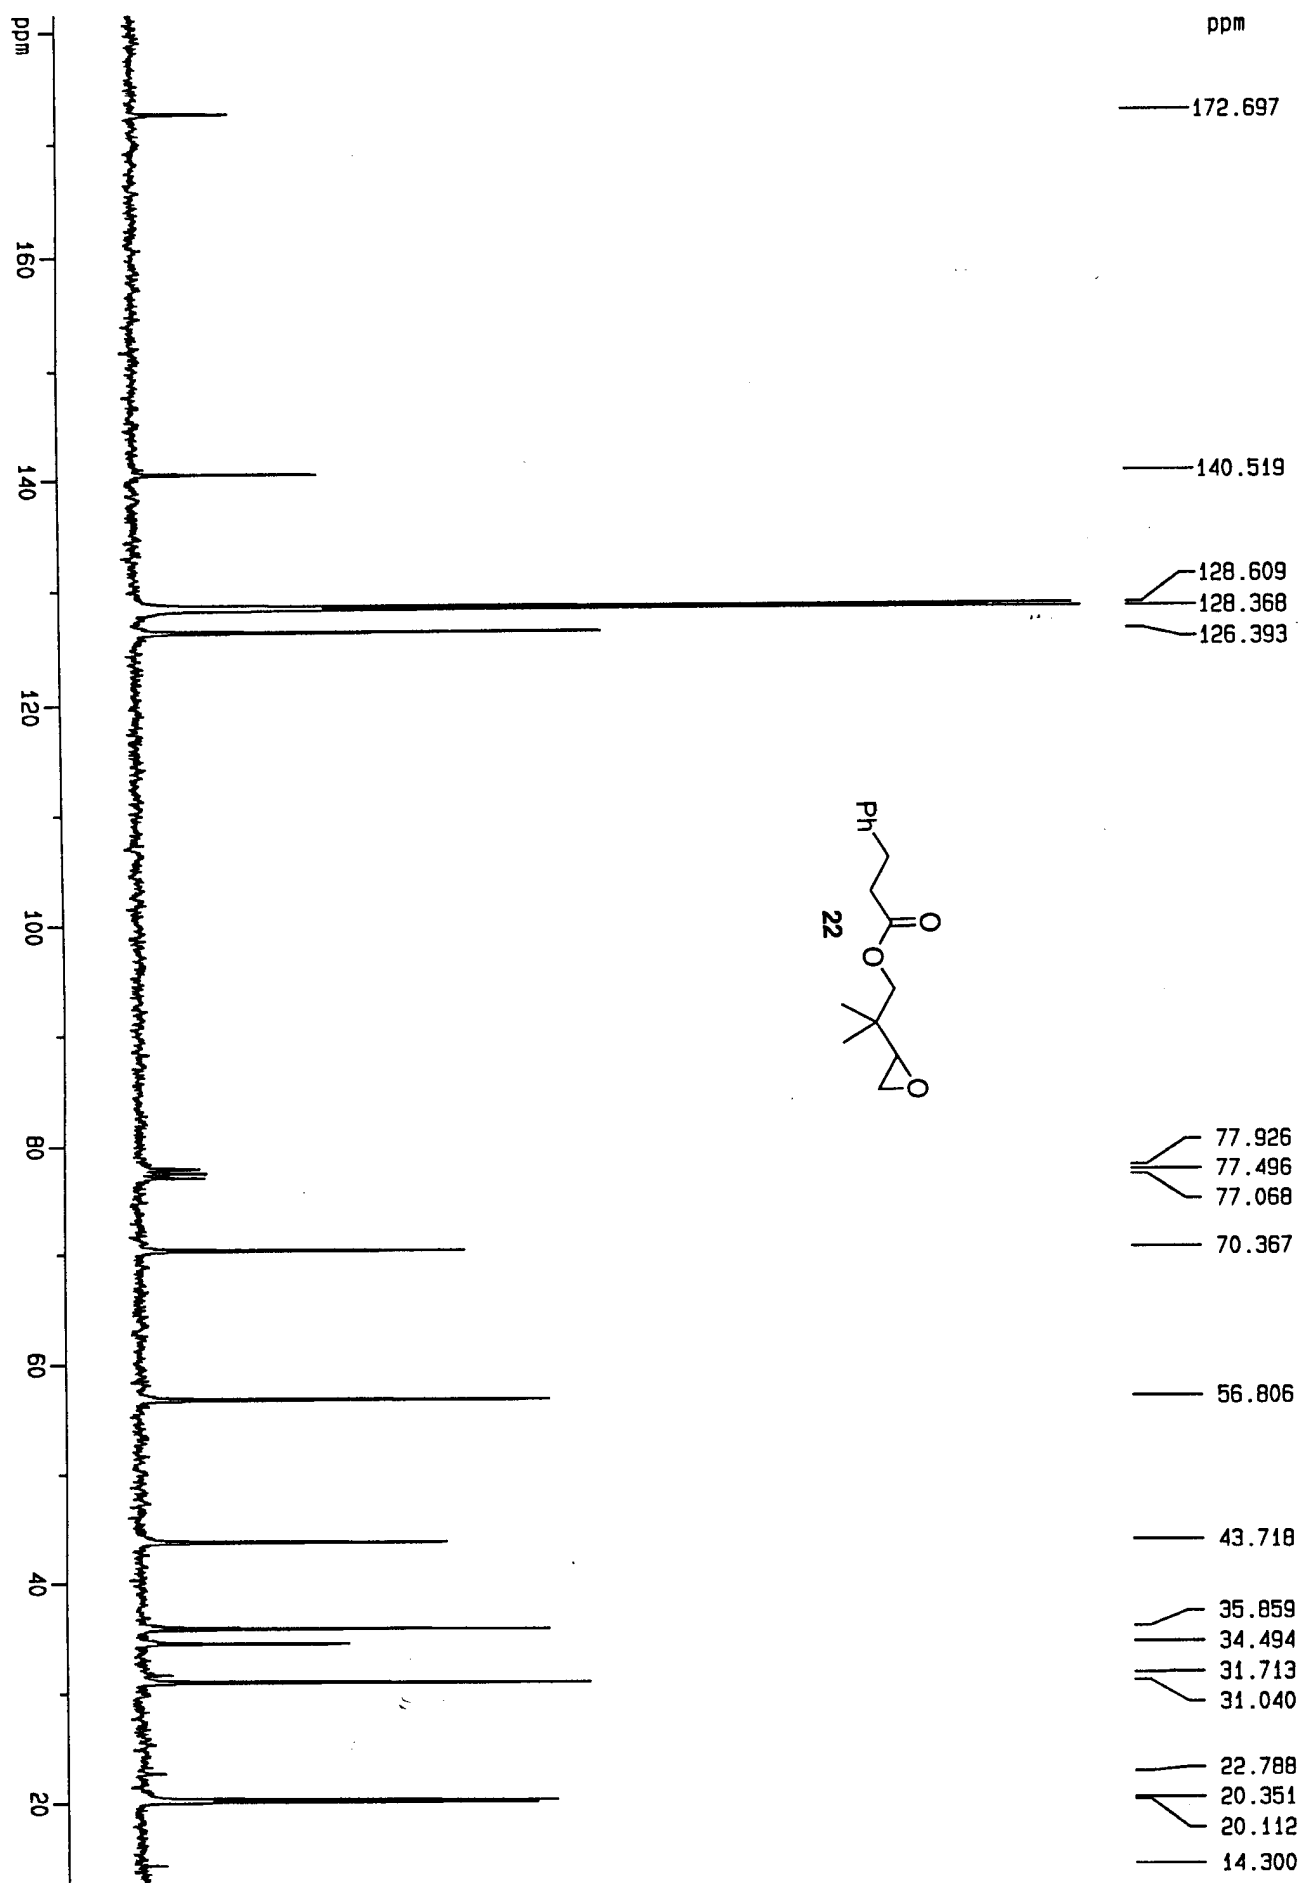



ppm

7.37501  
7.35102  
7.32650  
7.31198  
7.28715  
7.27448  
7.24934

4.21983  
4.19429  
4.09642  
4.08100  
3.85746  
3.84026  
3.83190  
3.81564  
3.77849  
3.43842  
3.40174  
2.95698  
2.93556  
2.93032  
2.89954  
2.29687  
2.27764  
2.27027  
2.26106  
2.24028

1.36192

0.84060

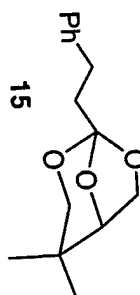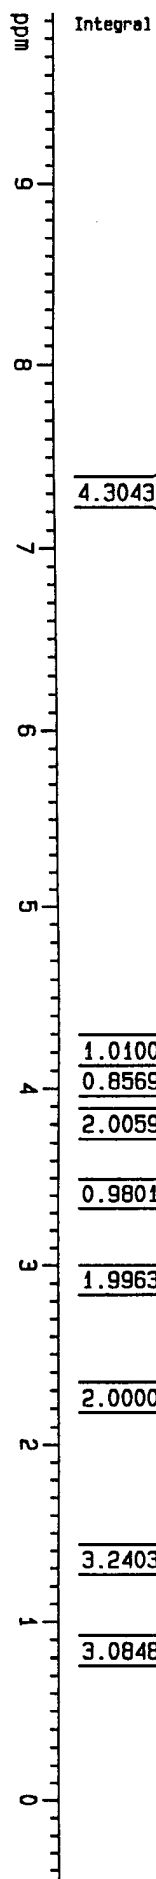

ppm

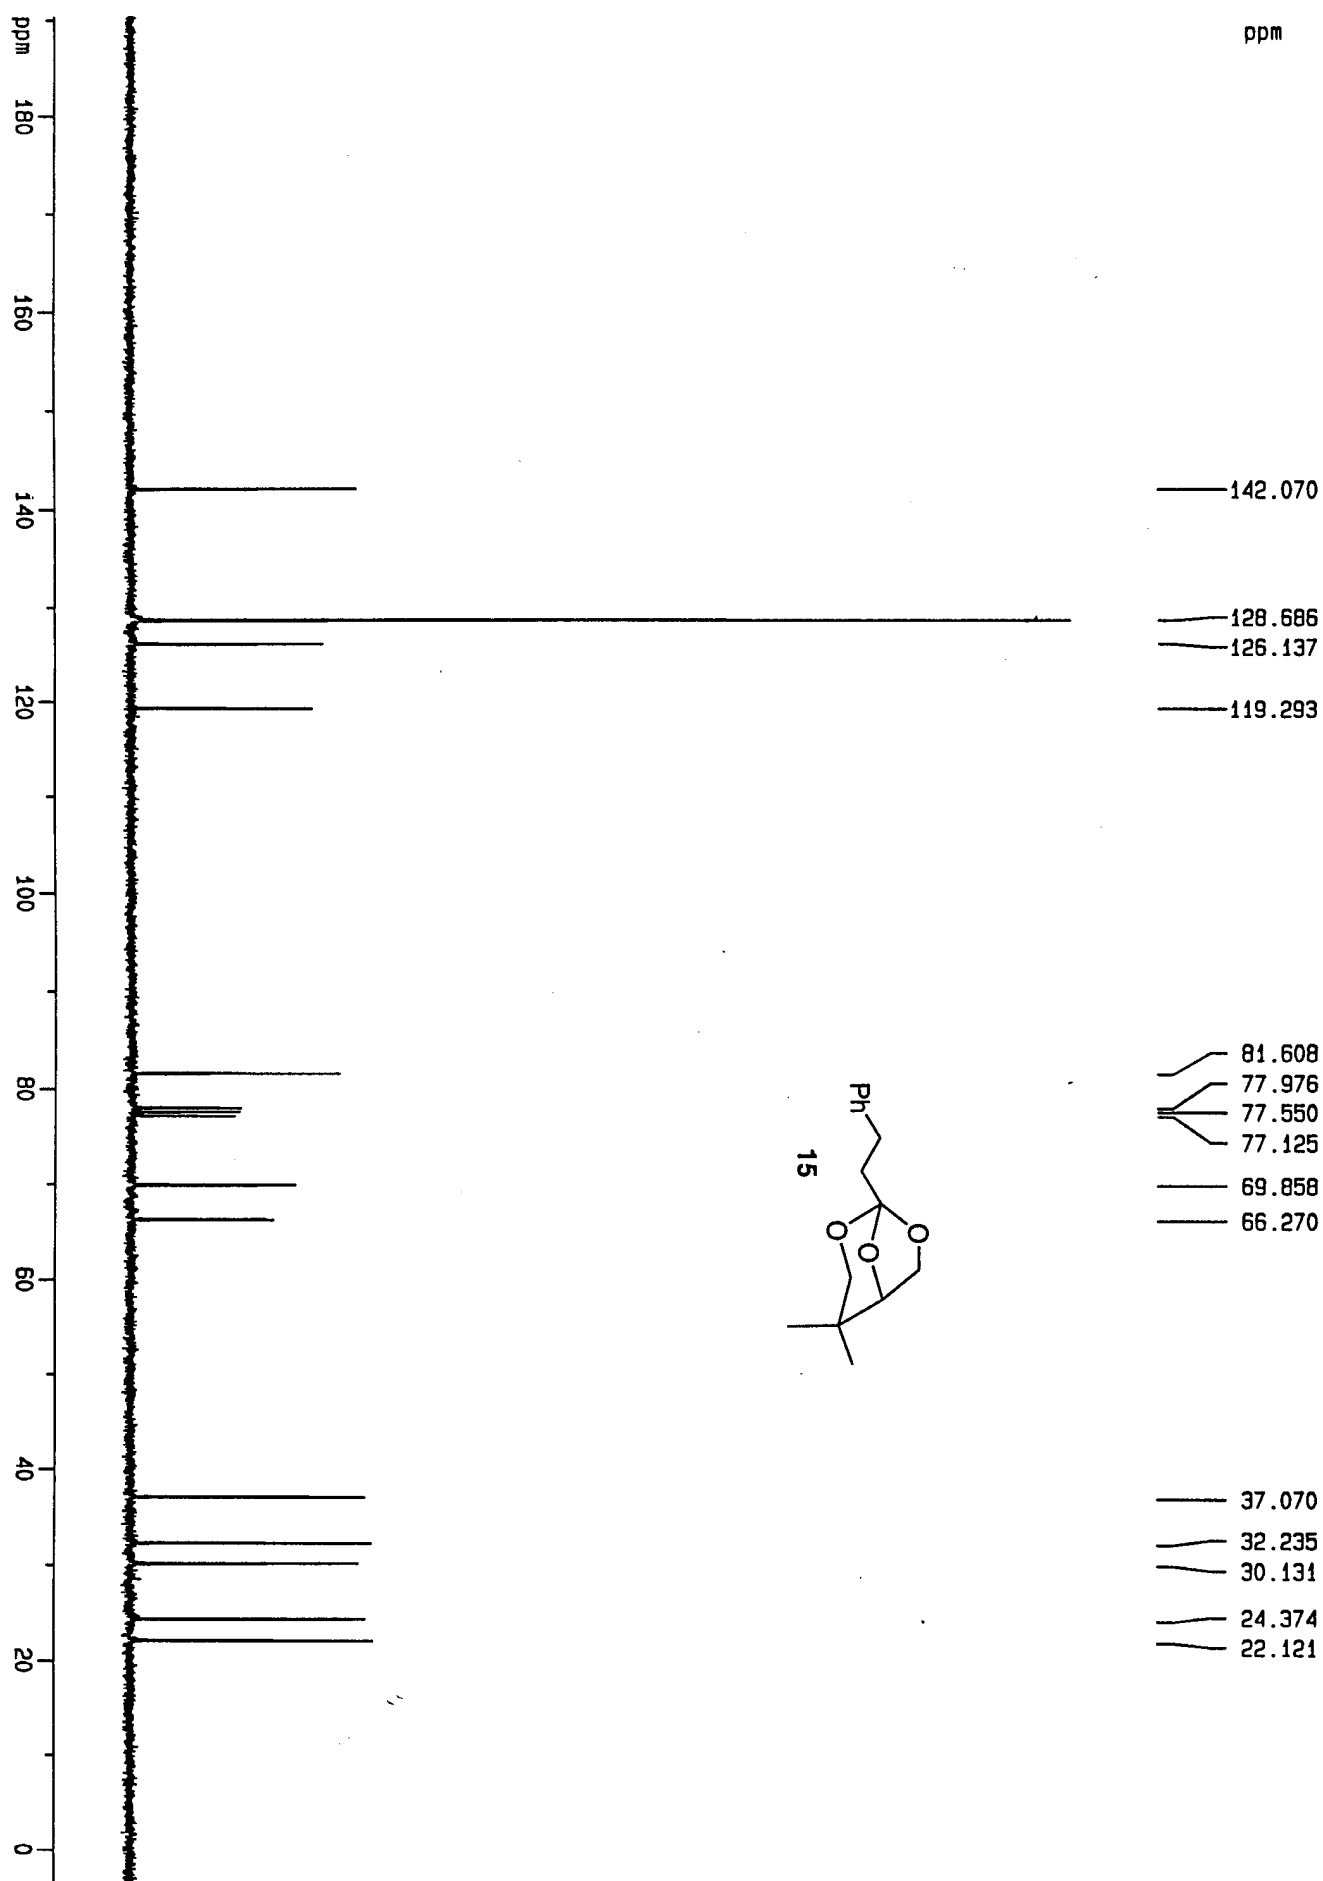

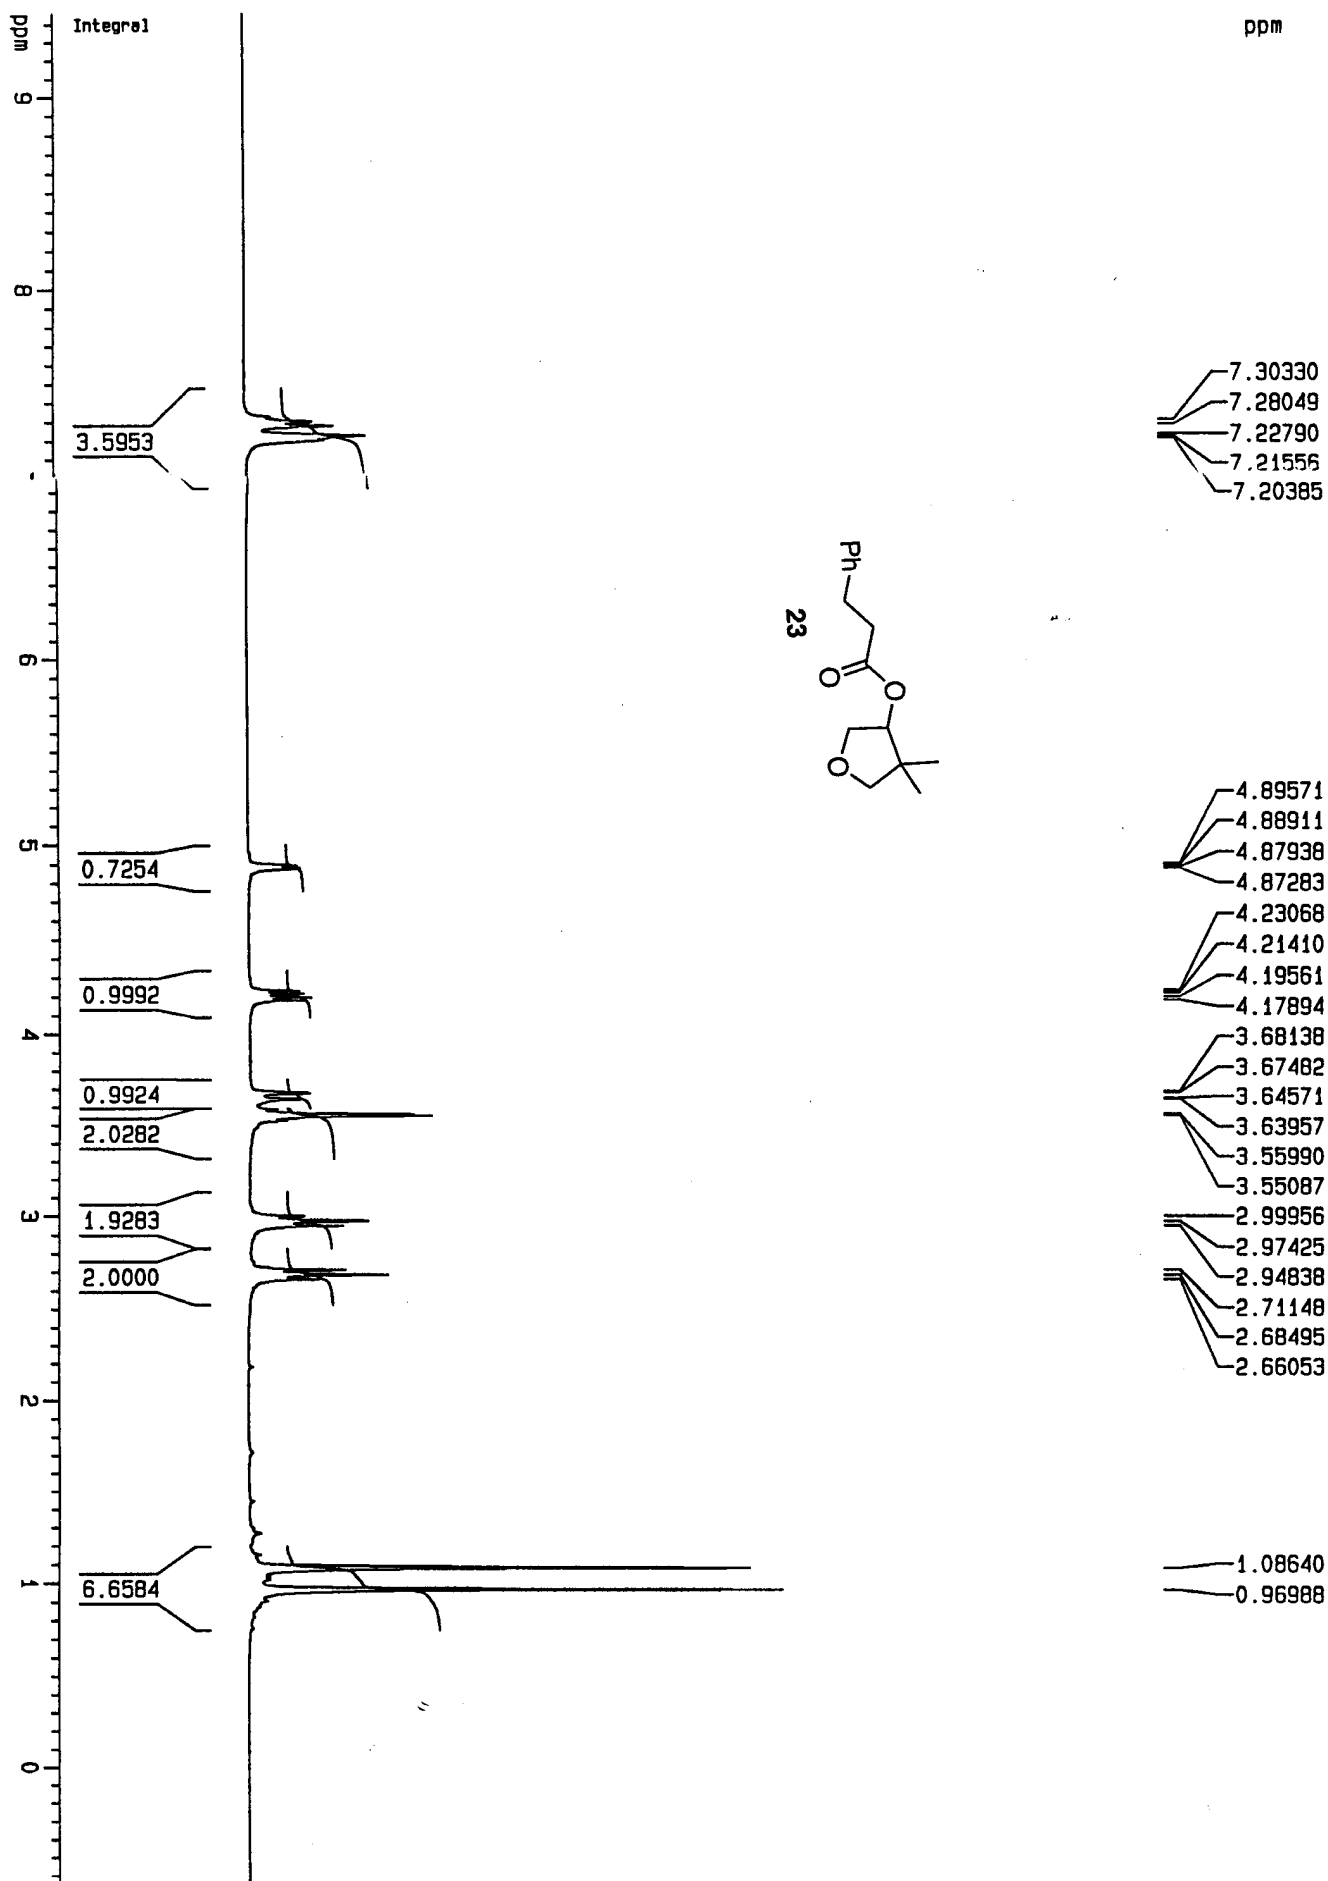

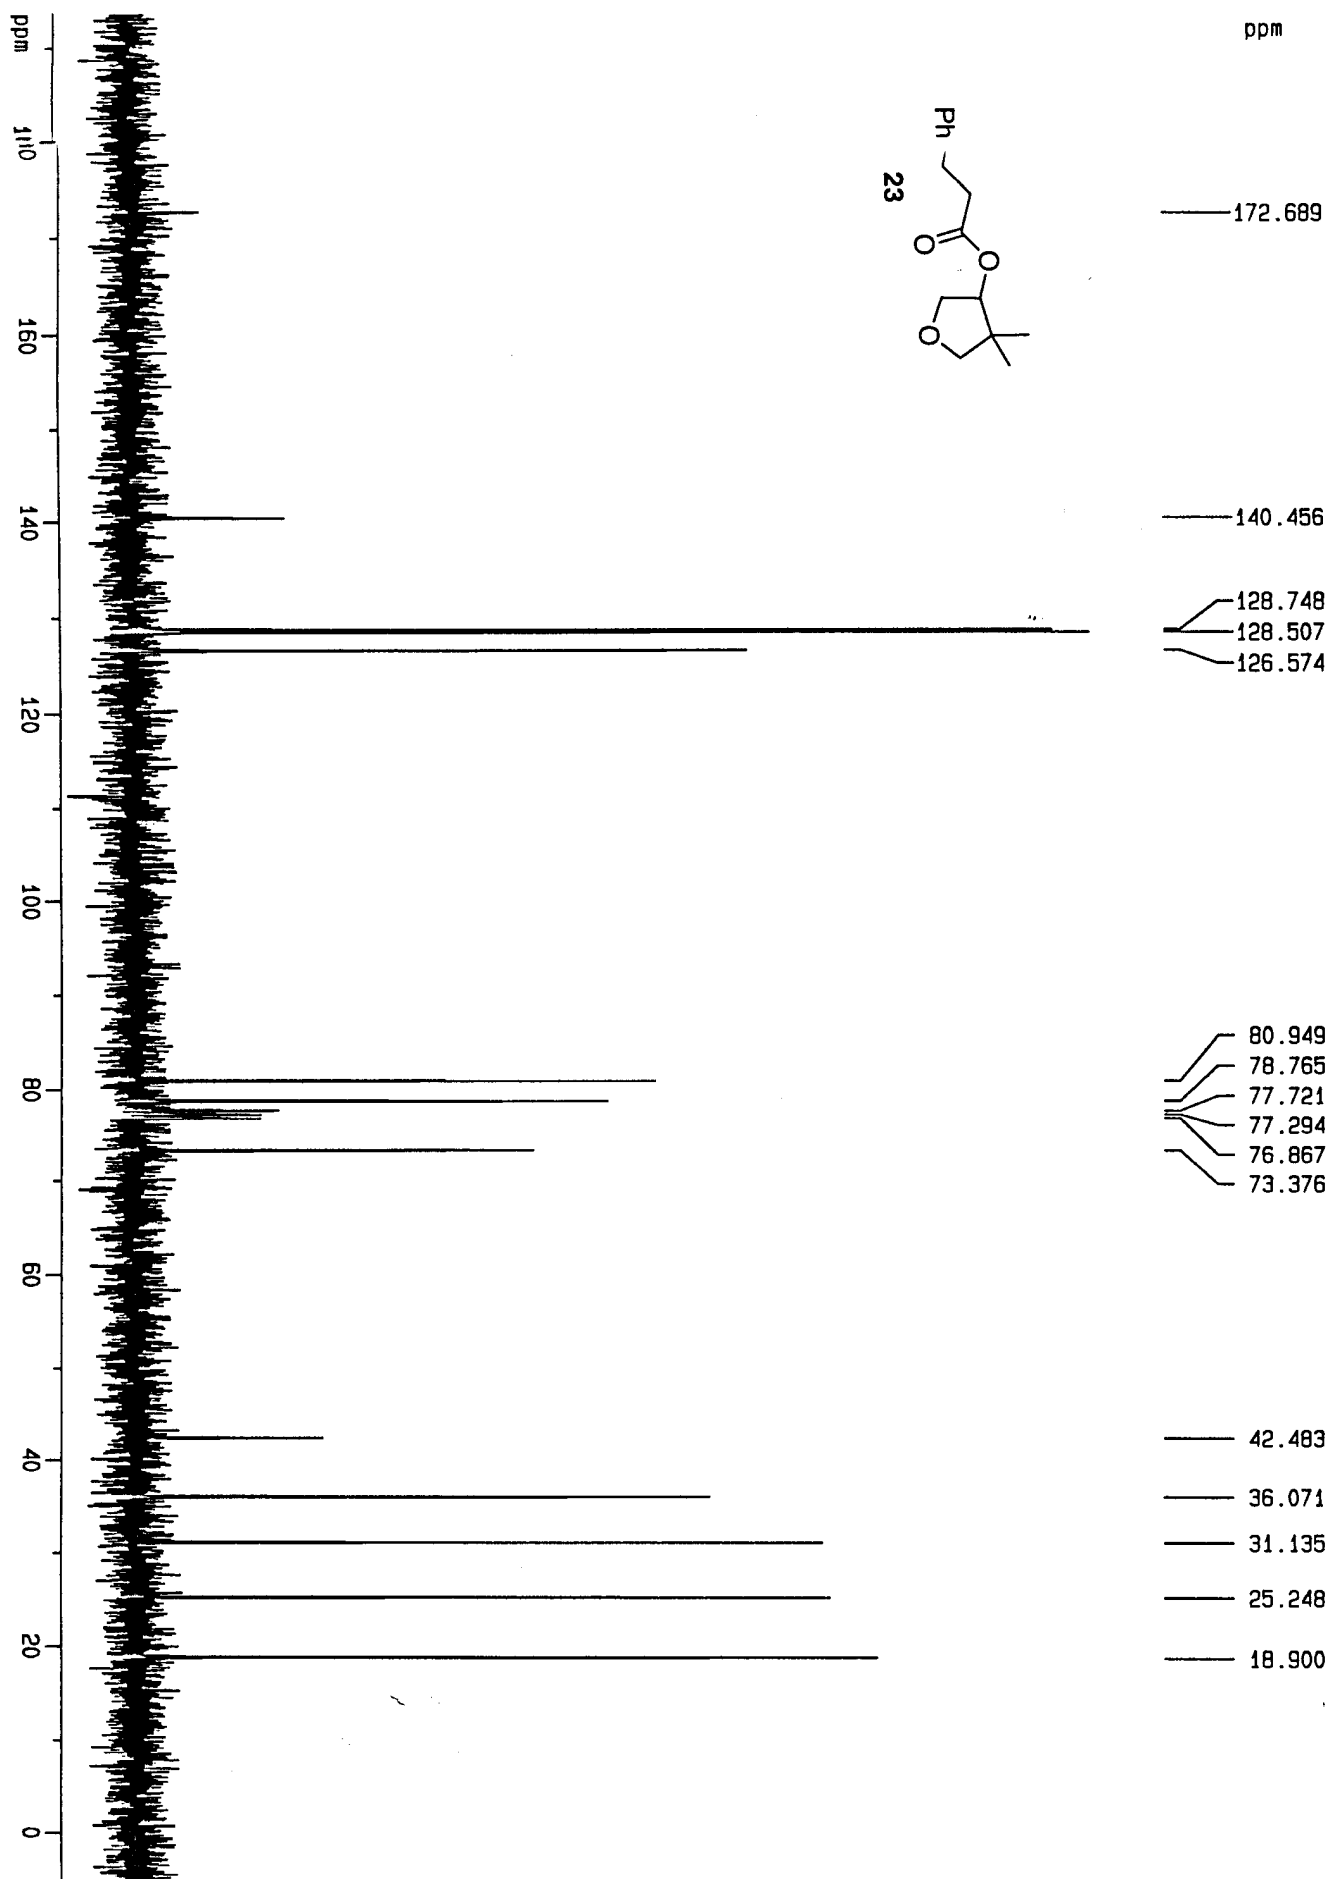

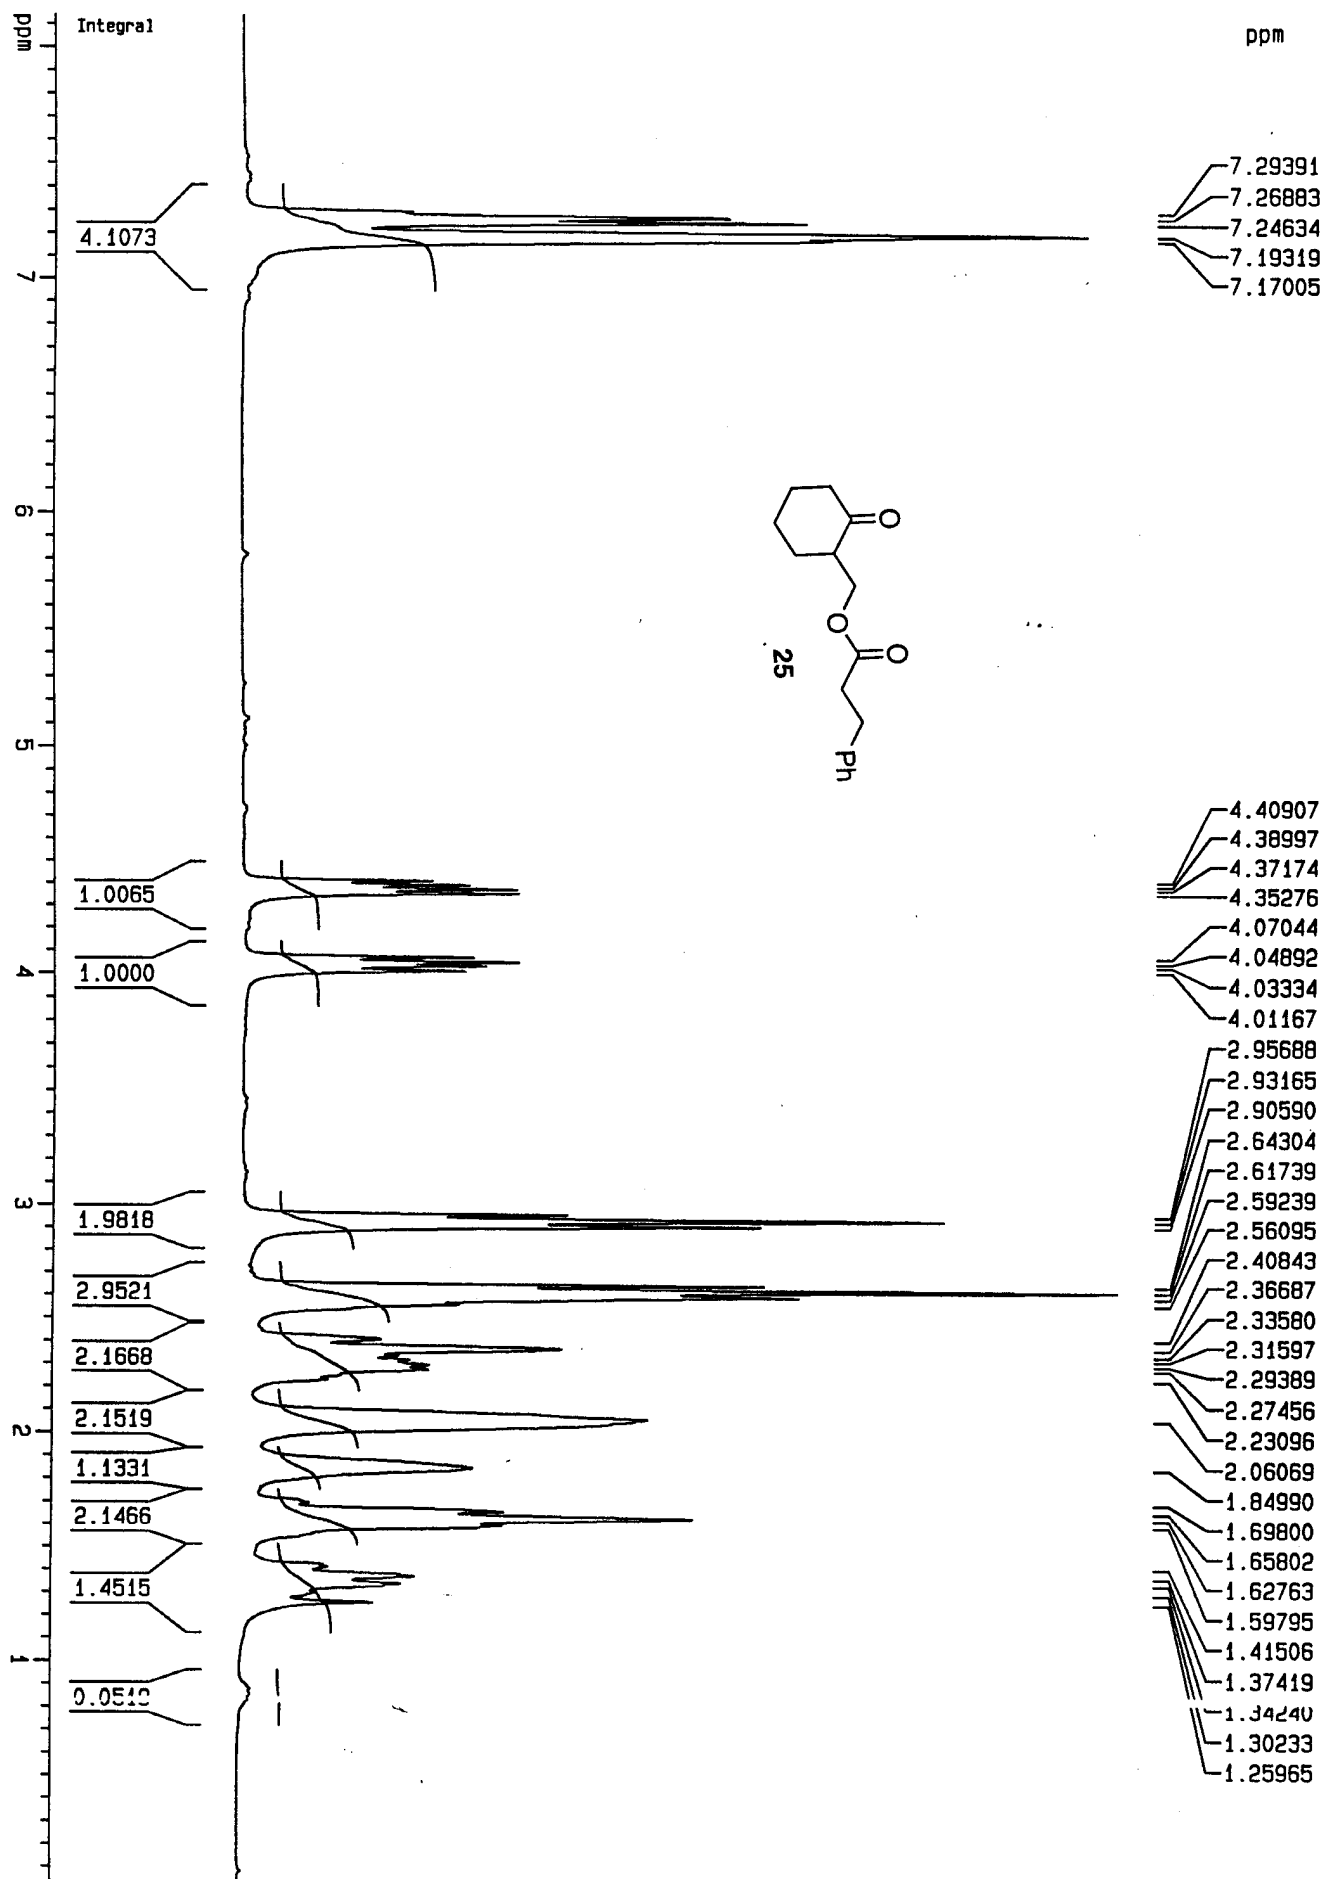

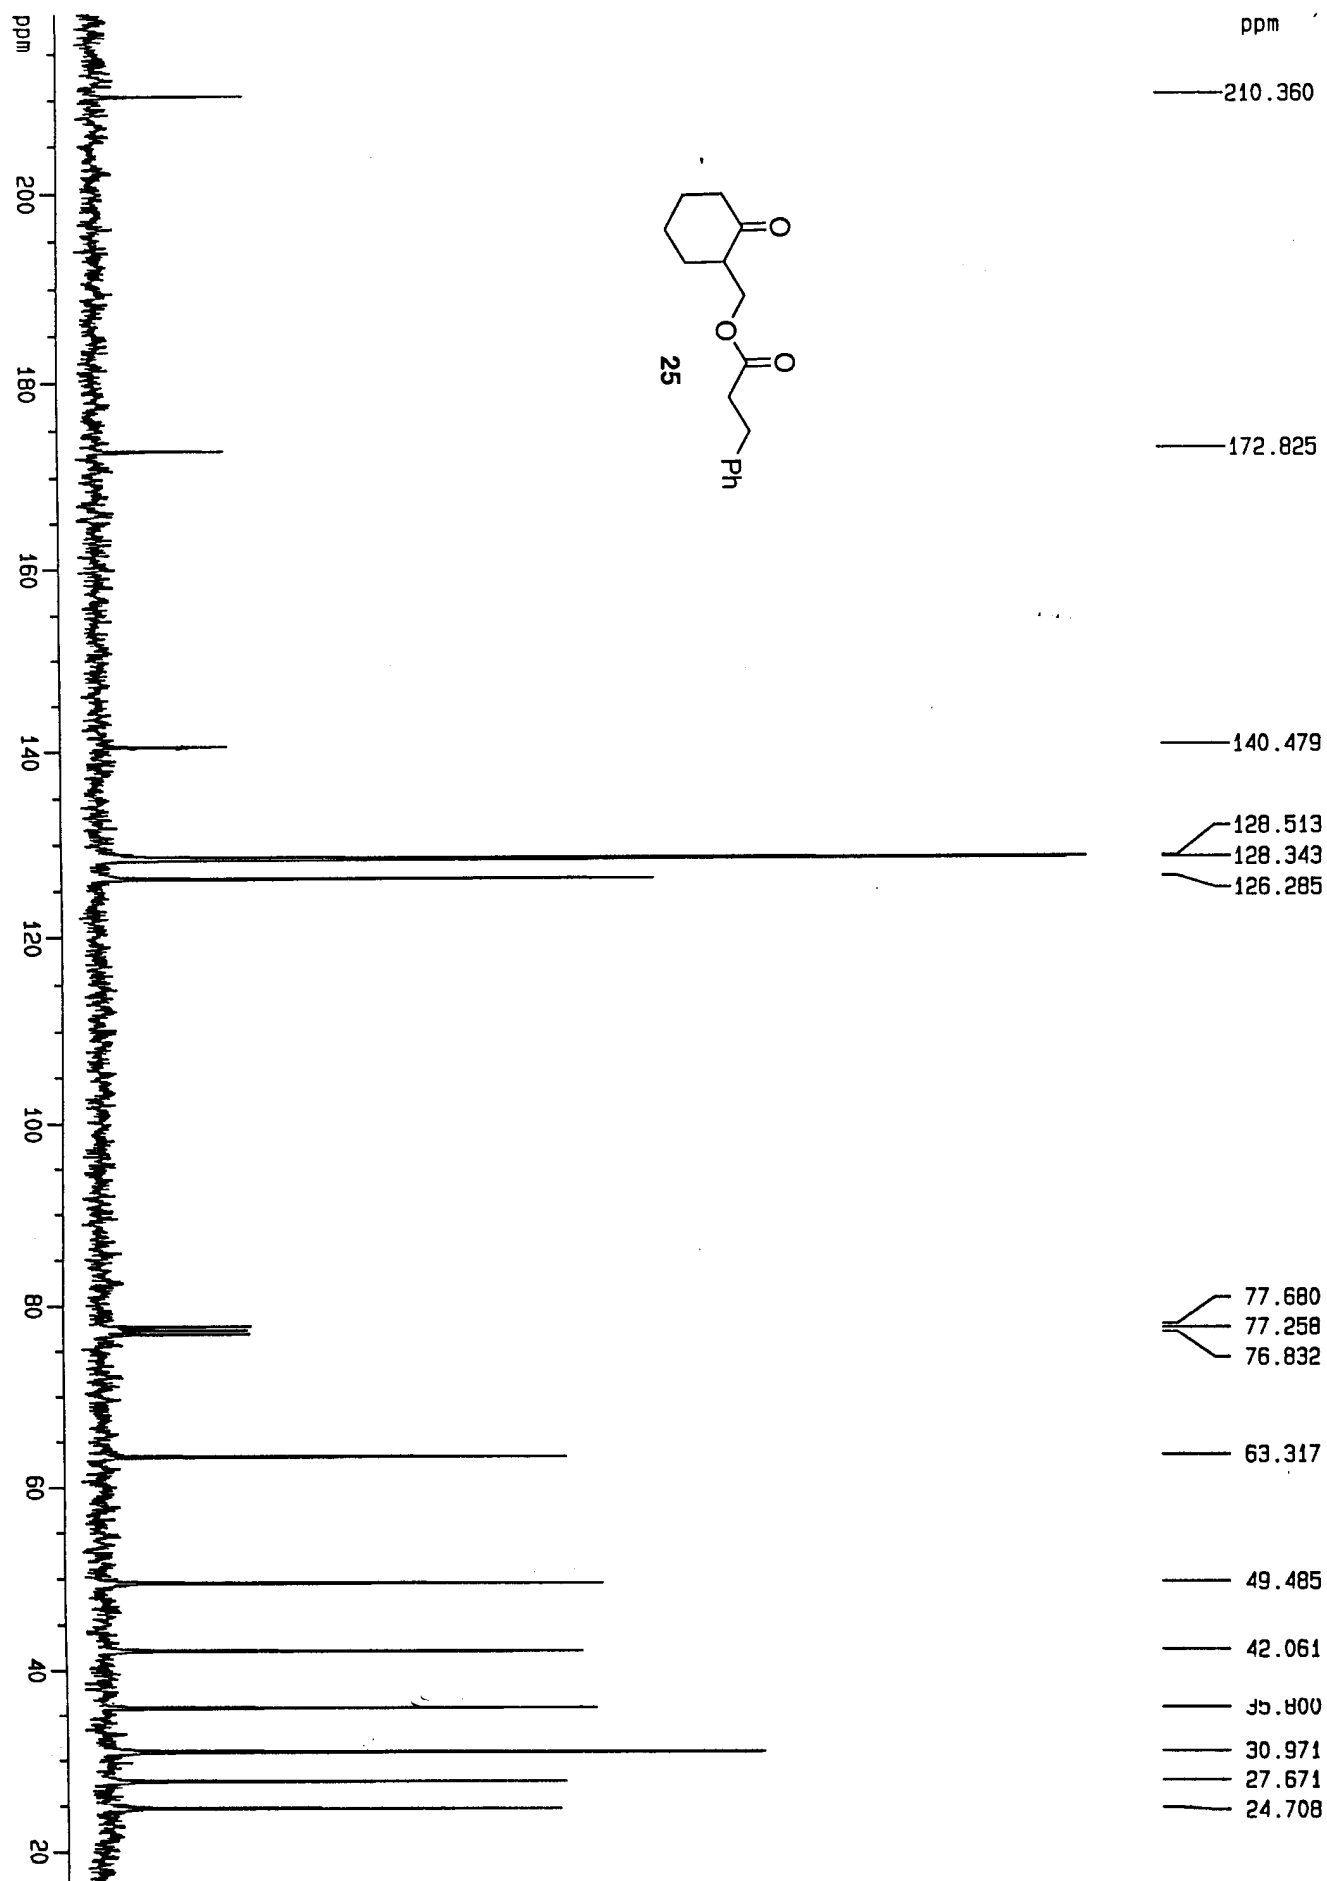

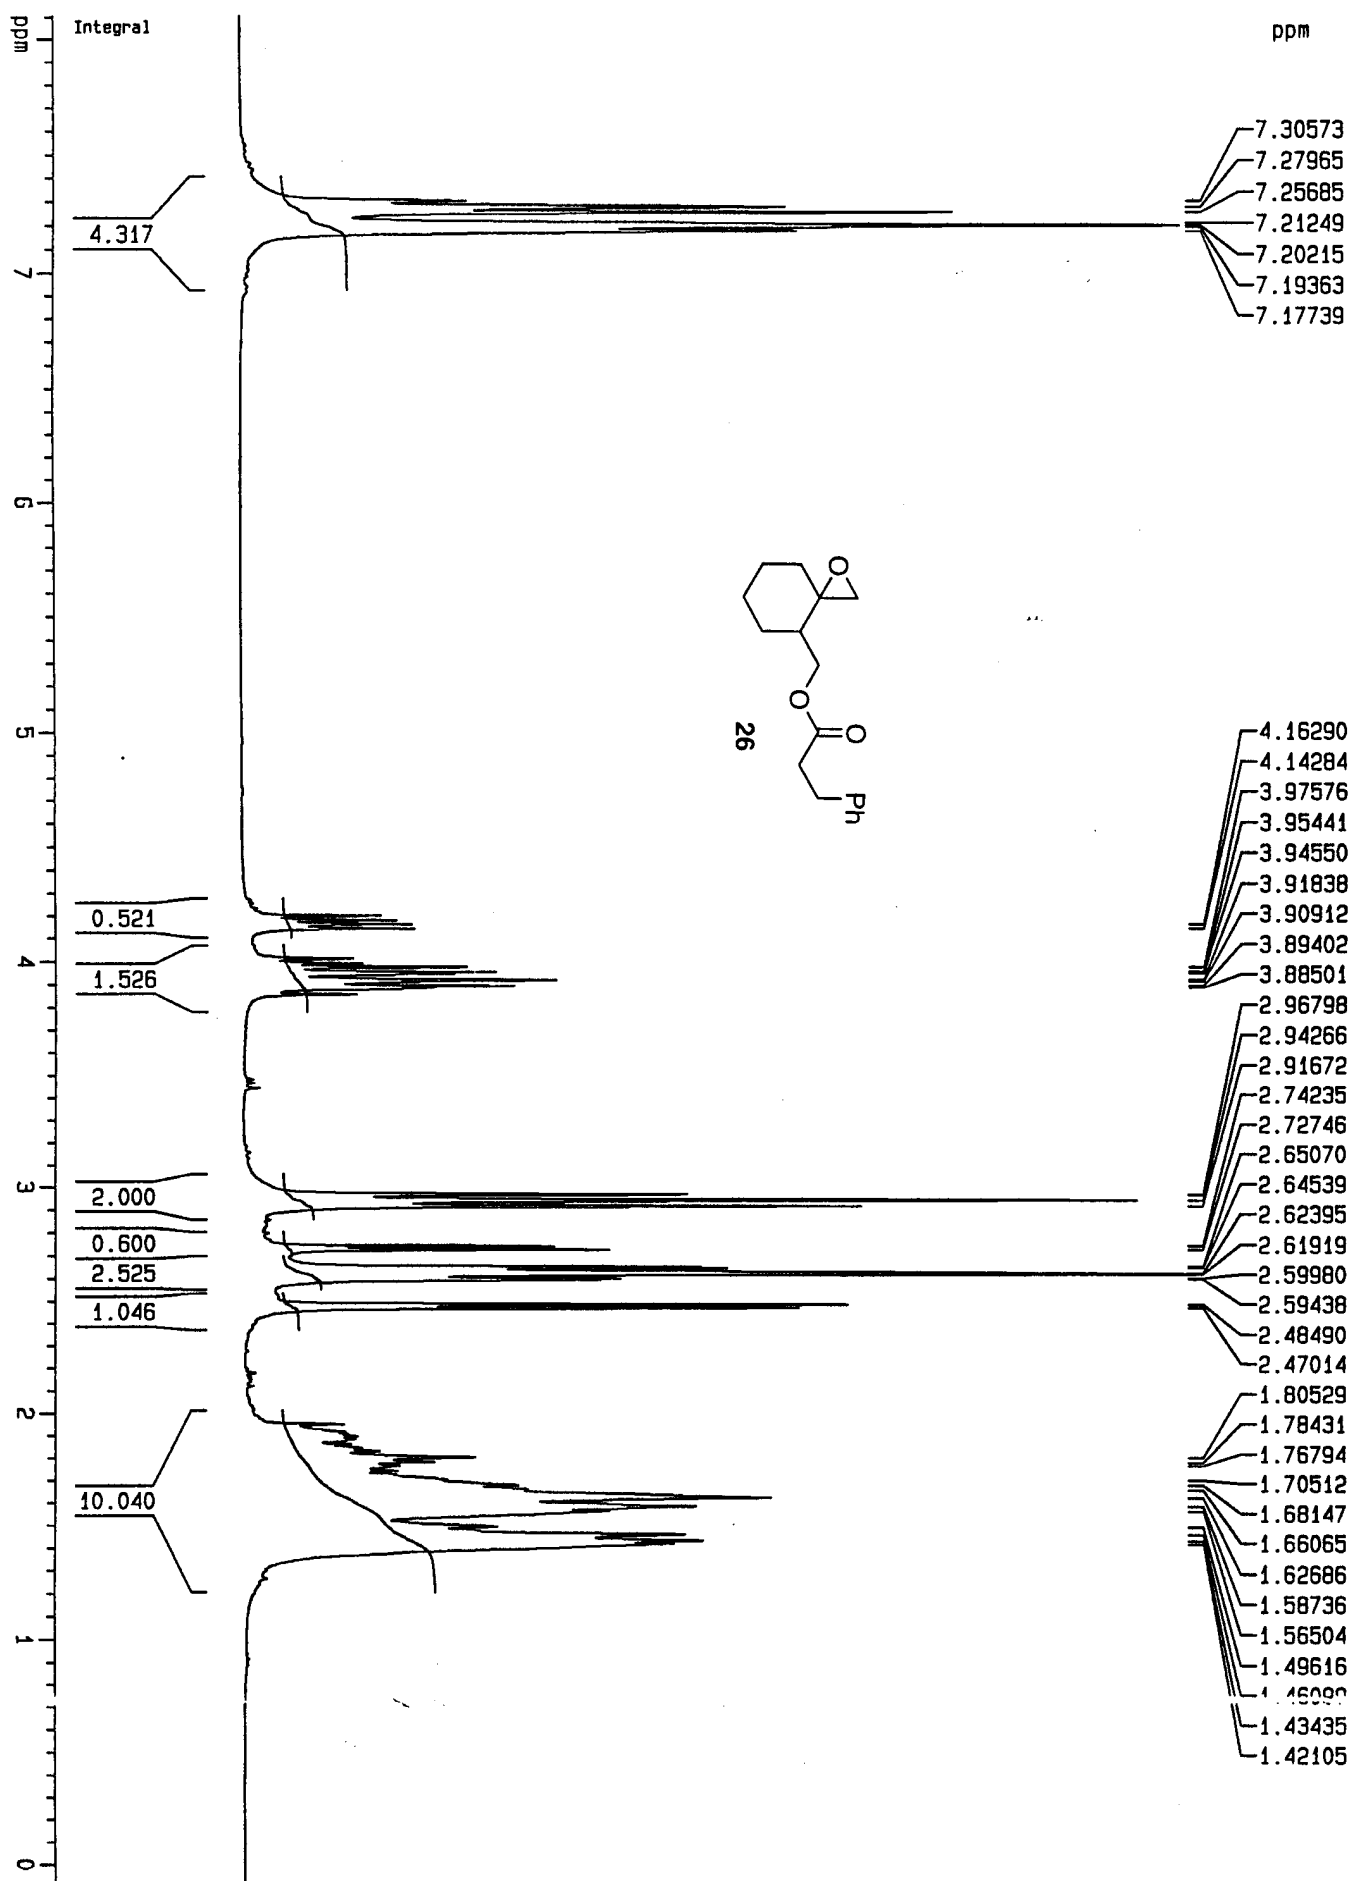

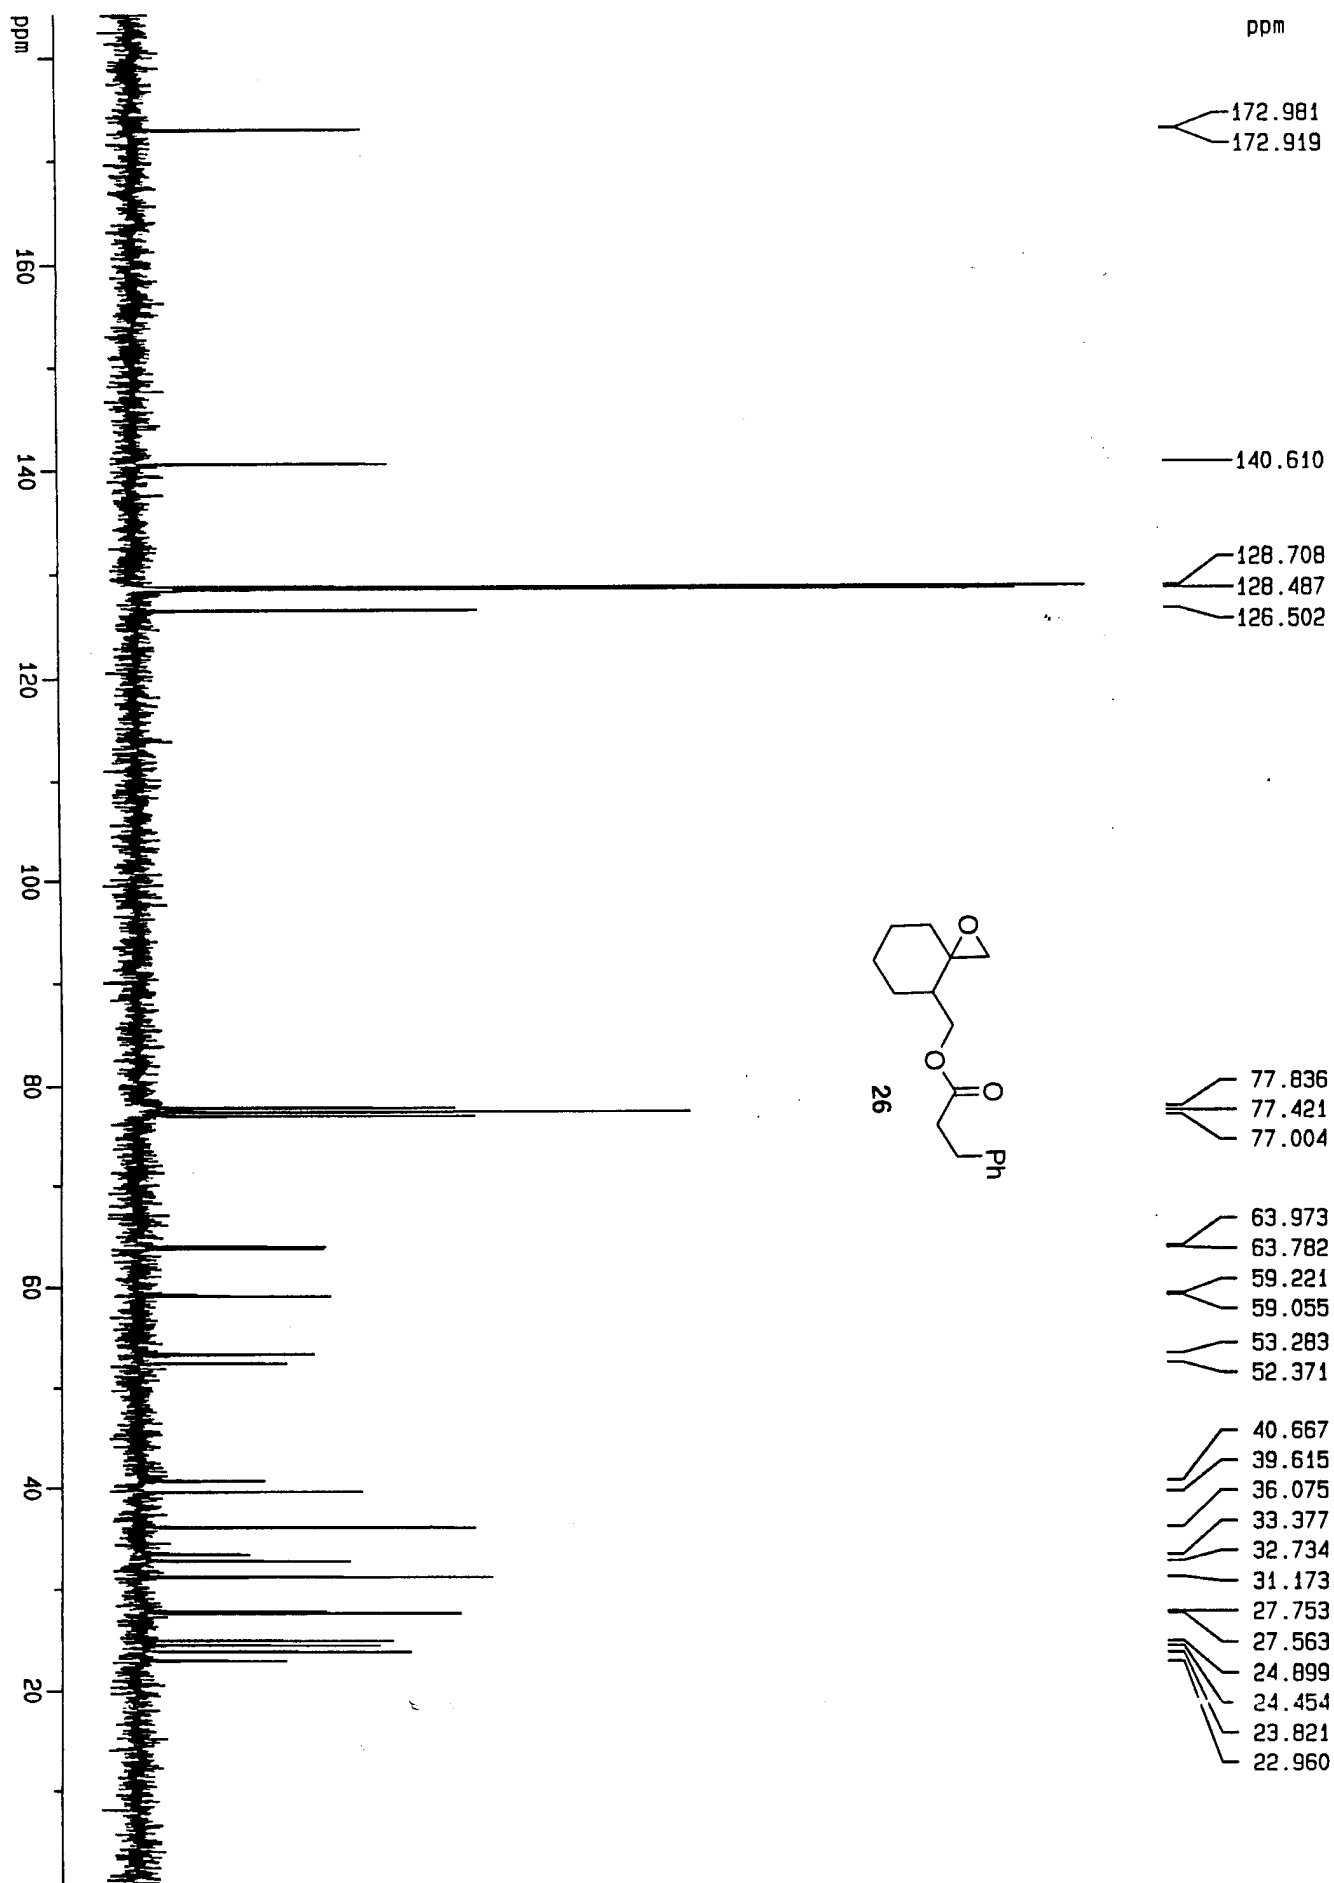



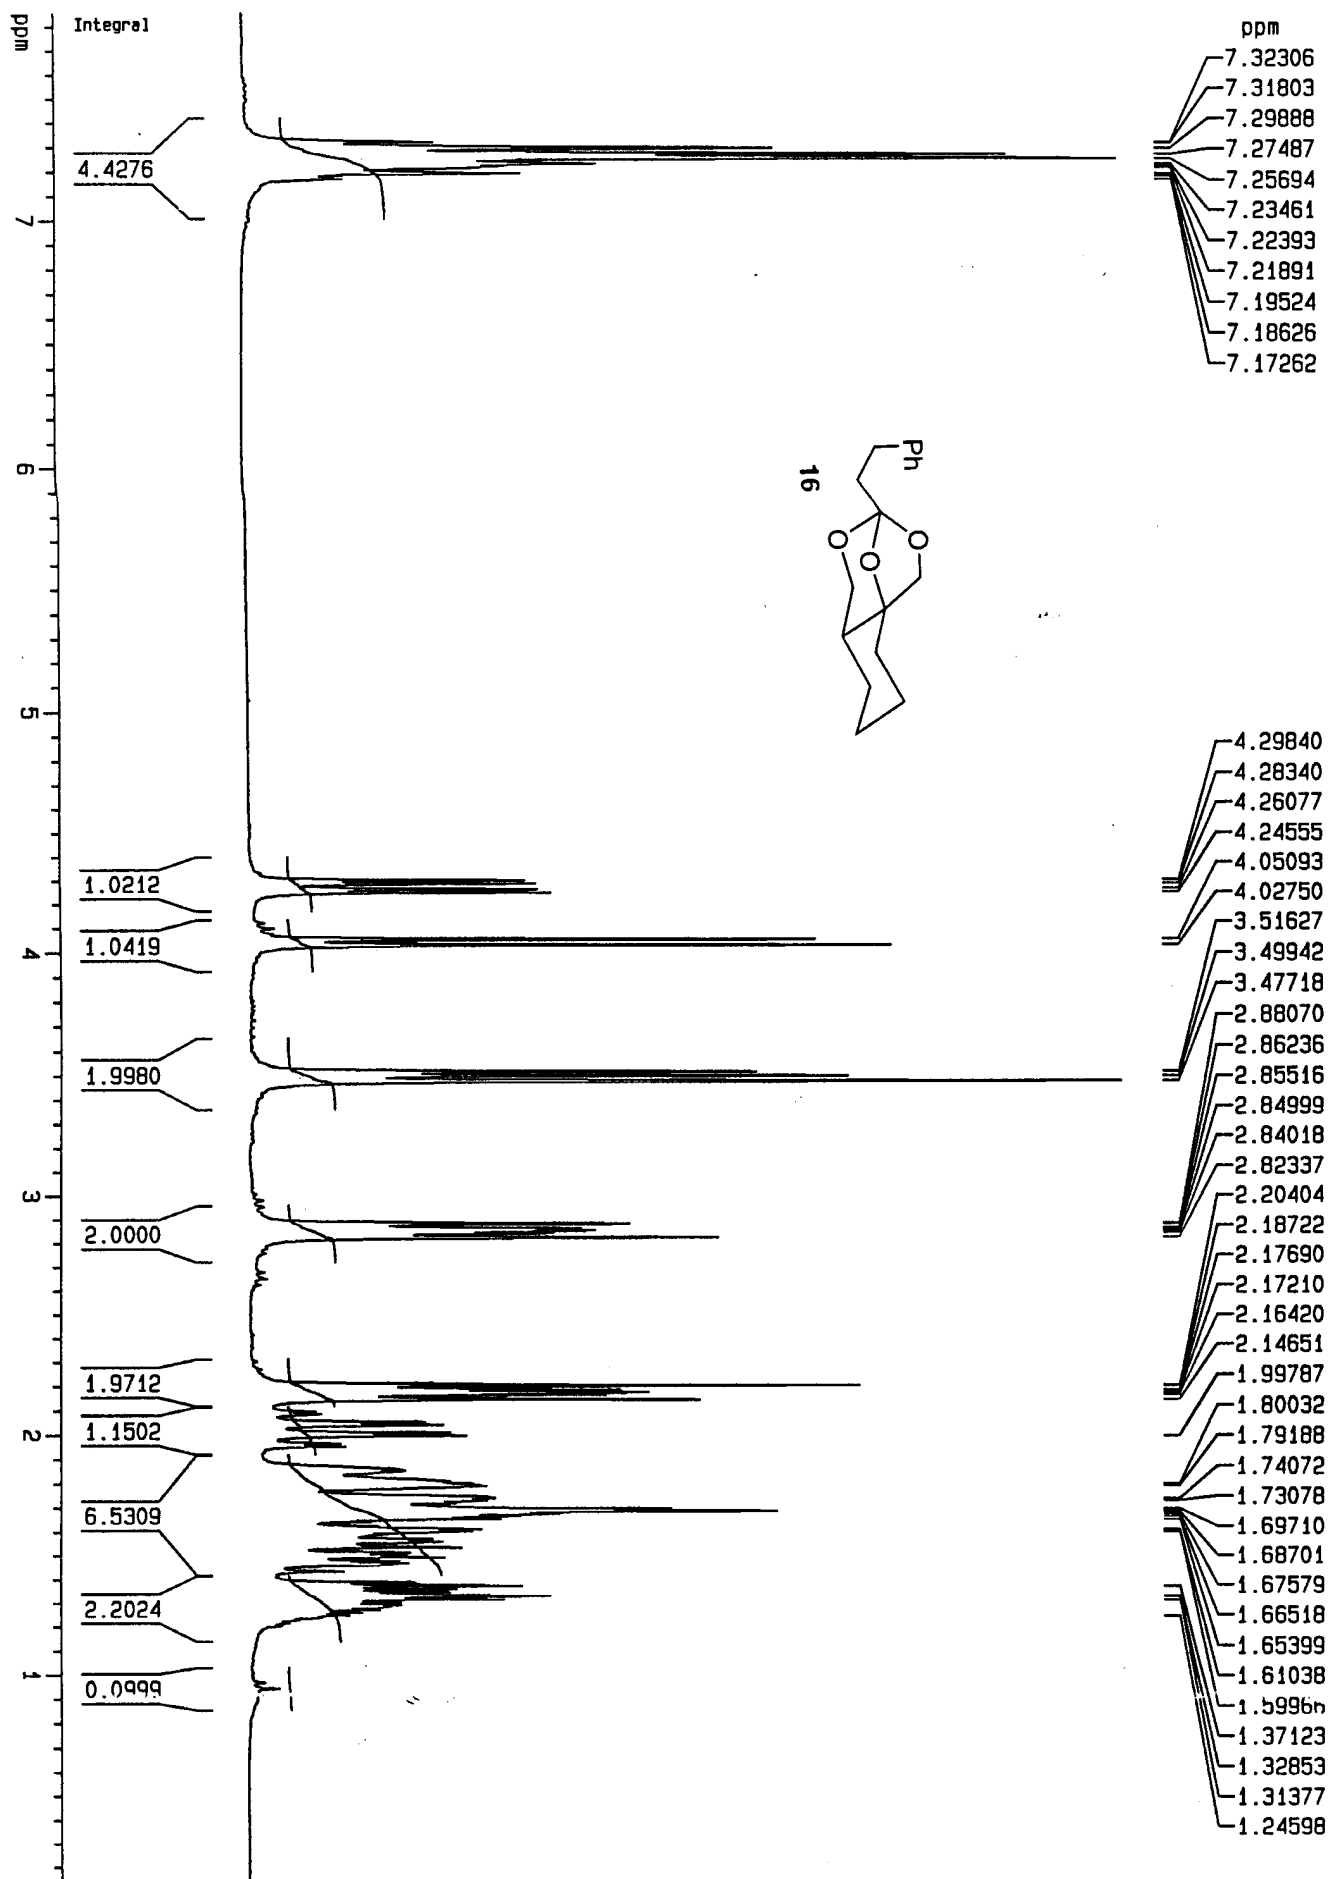

ppm

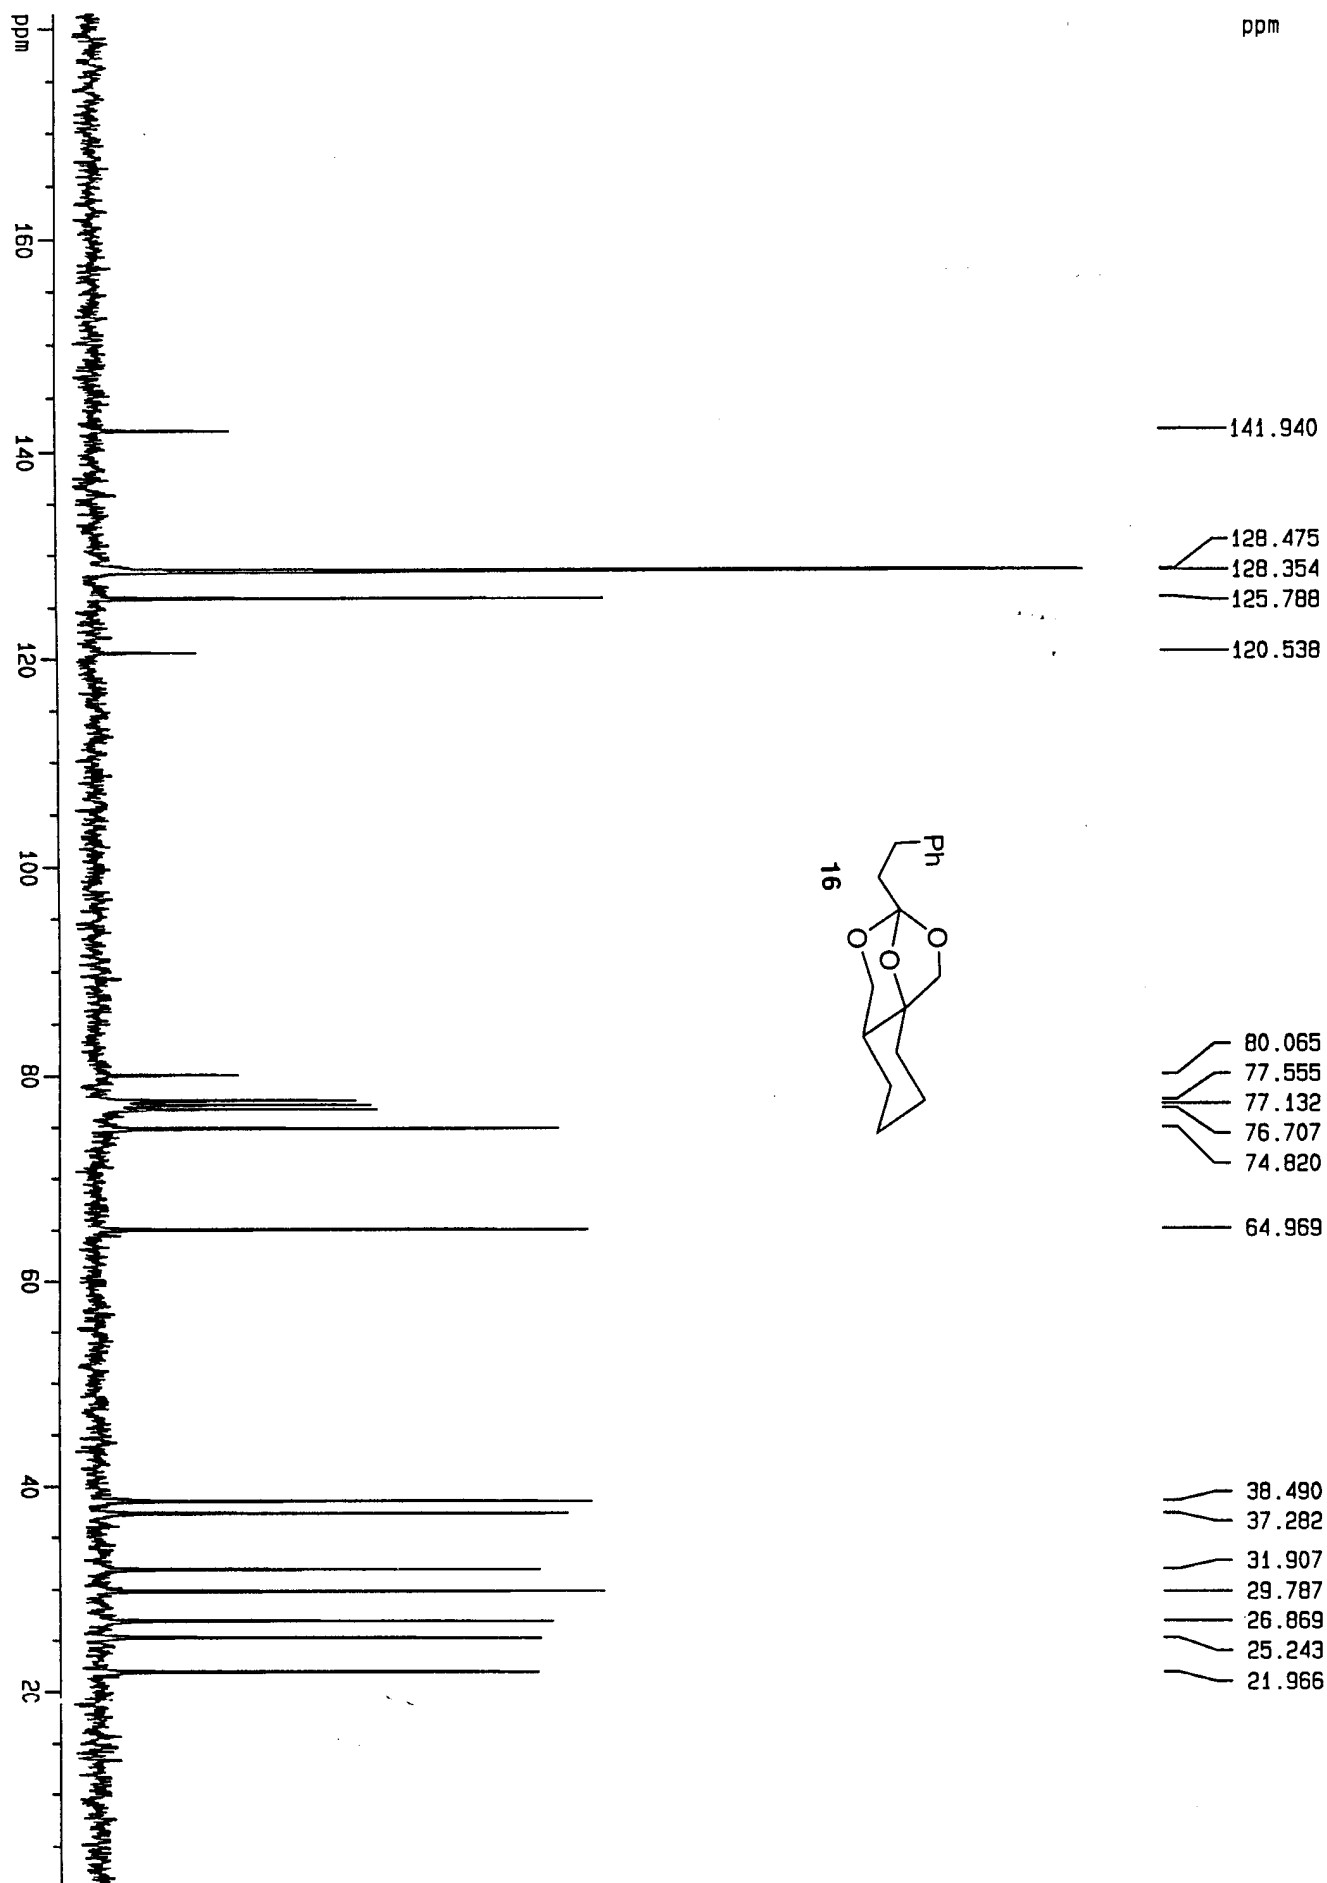

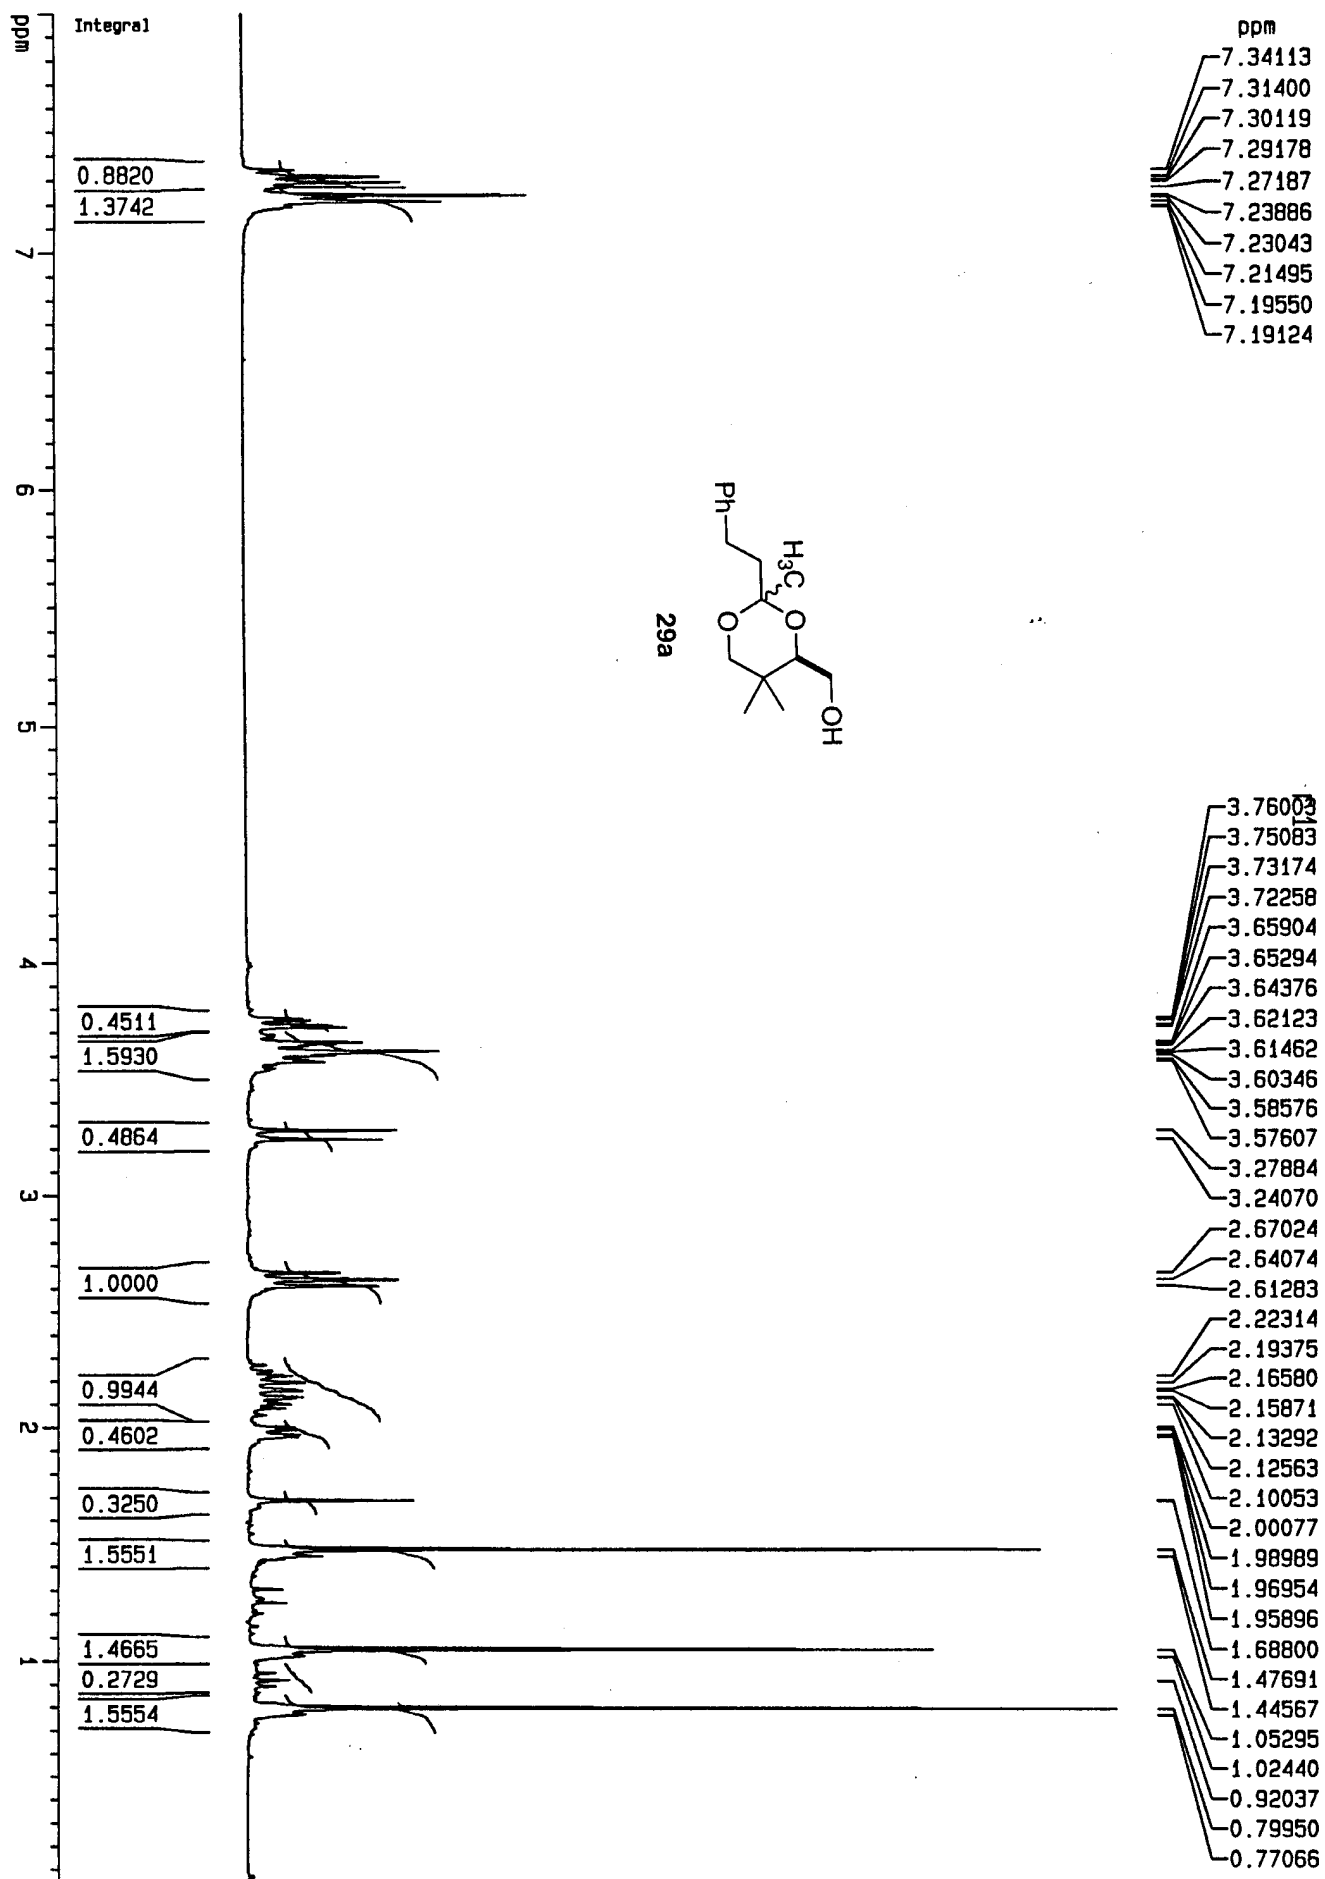

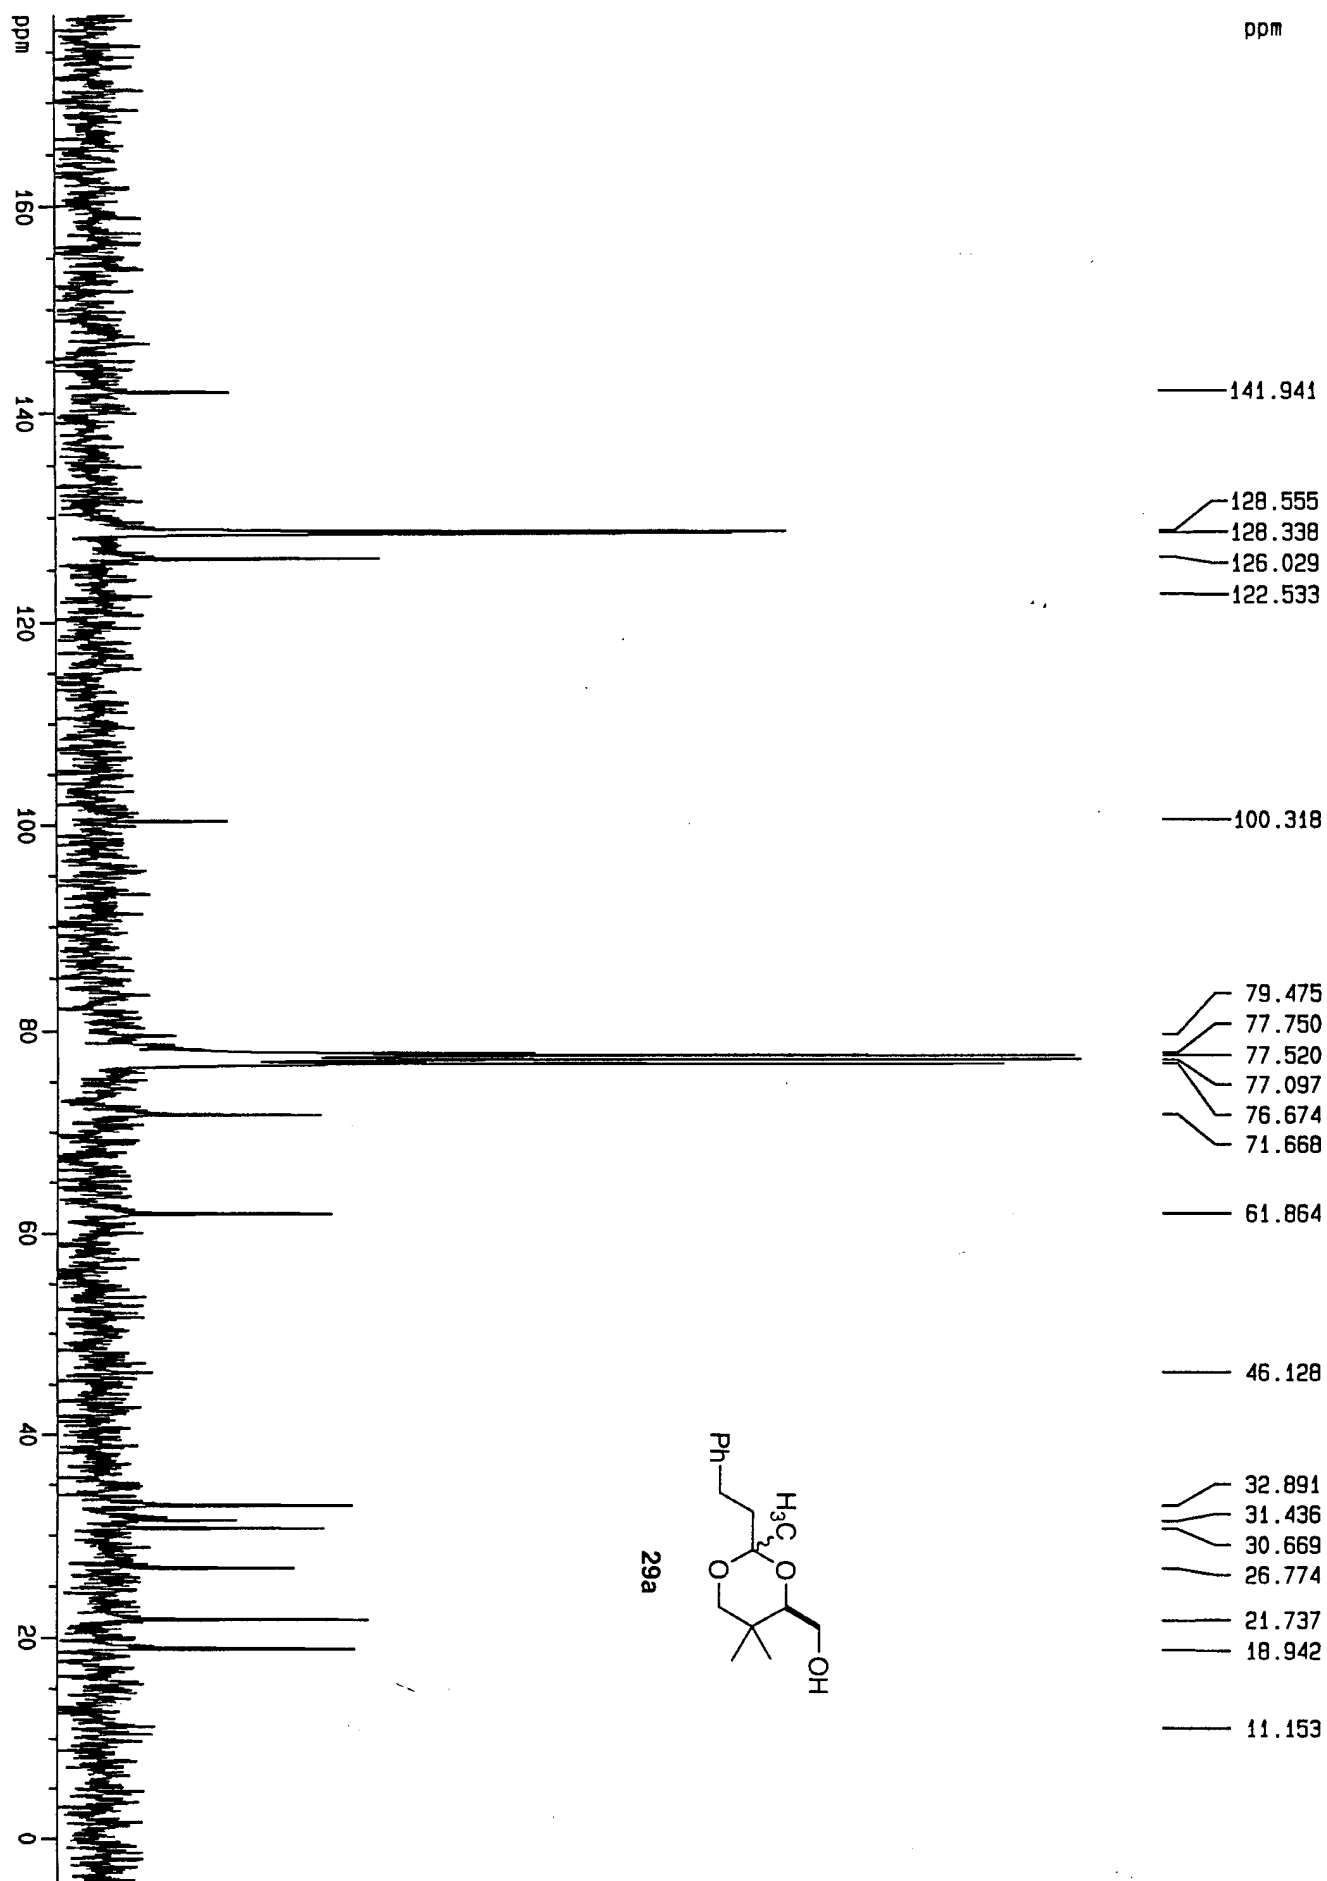

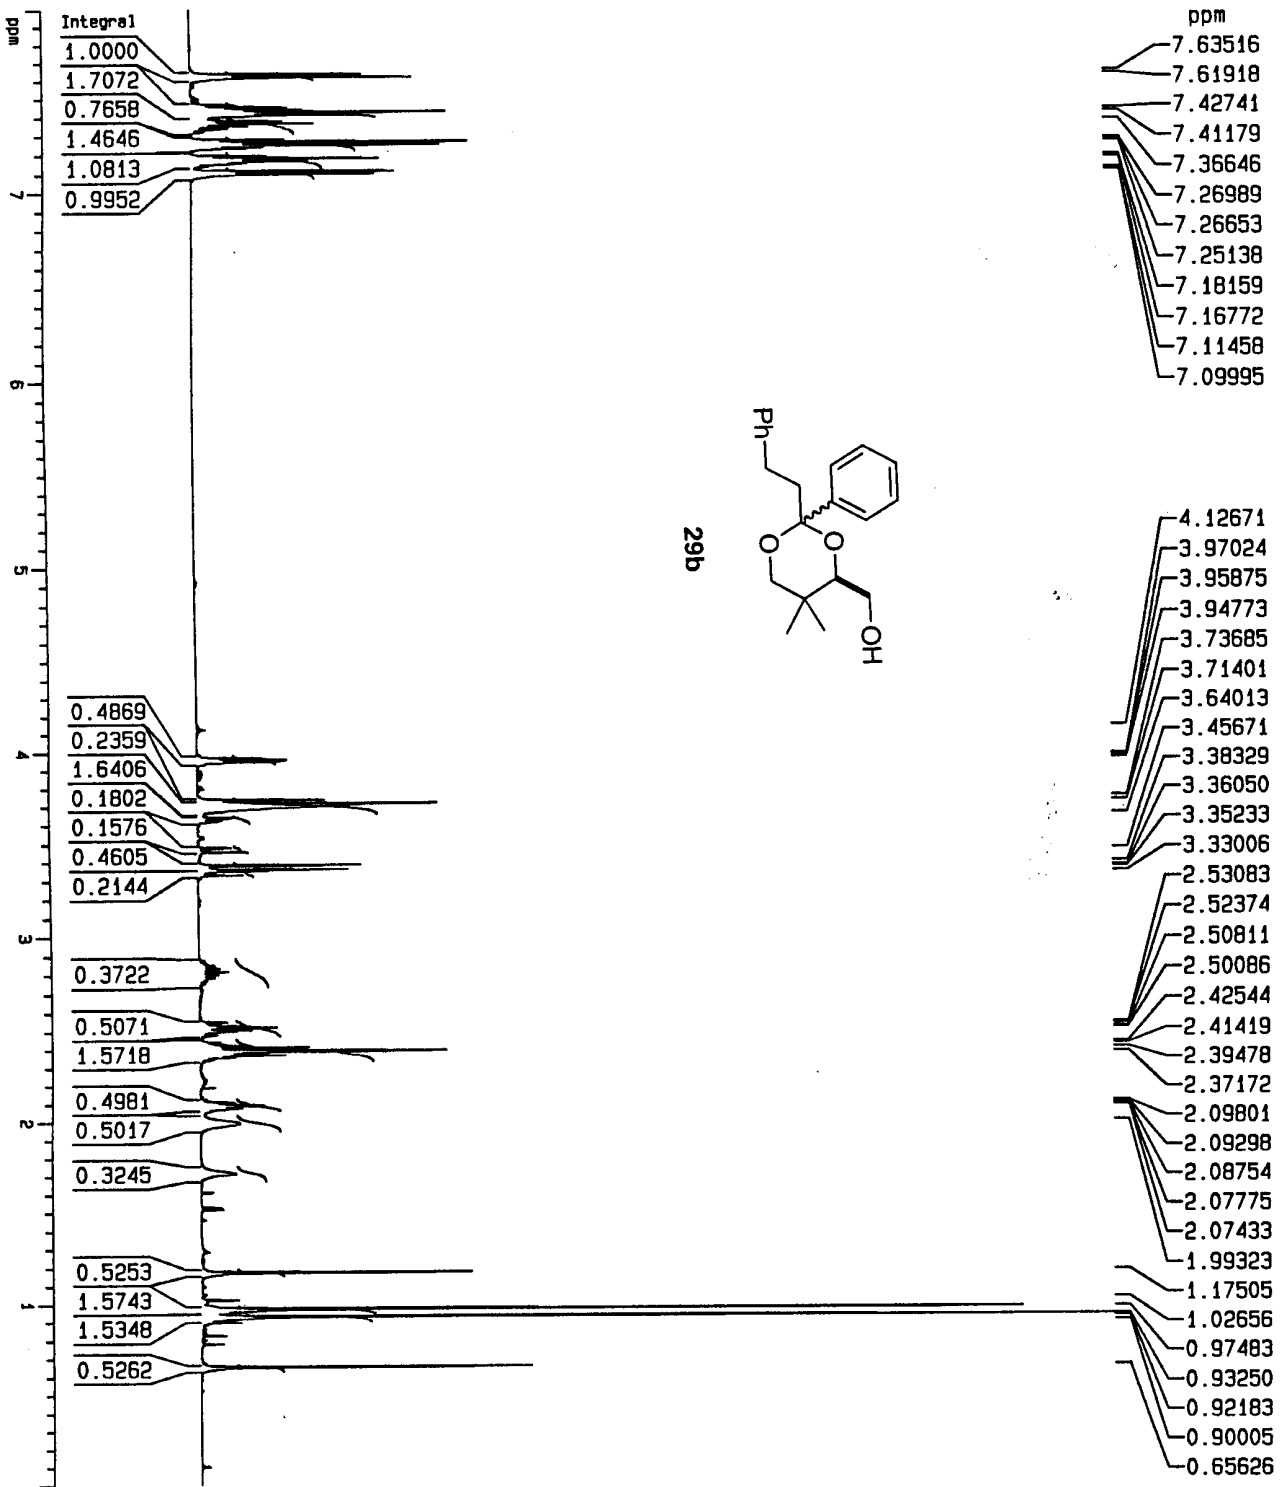

Current Data Parameters

NAME da-p11-x4

EXPNO 1

PROCNO 1

F2 - Acquisition Parameters

Date\_ 500000

Time 12.48

INSTRUM spect

PROBHD 5 mm TXI 13C

PULPROG zg

TD 32768

SOLVENT CDCl3

NS 8

DS 0

SMH 7507.507 Hz

FIDRES 0.229114 Hz

AQ 2.1823988 sec

RG 35.9

DW 66.600 usec

DE 6.00 usec

TE 290.0 K

D1 12.0000000 sec

P1 19.20 usec

DE 6.00 usec

SFO1 500.133008 MHz

NUC1 1H

PL1 -1.00 dB

F2 - Processing parameters

SI 16384

SF 500.1300077 MHz

WDW EM

SSB 0

LB 0.40 Hz

GB 0

PC 1.00

1D NMR plot parameters

CX 20.00 cm

F1P 8.000 ppm

F1 4001.04 Hz

F2P 0.000 ppm

F2 0.00 Hz

PPMCM 0.40000 ppm/ci

HZCM 200.05200 Hz/cm

ppm

Integral

142.47  
142.24  
141.82  
139.99  
128.67  
128.41  
128.28  
128.06  
127.98  
127.85  
127.27  
125.90  
125.59  
102.34  
101.26  
78.74  
78.04  
77.34  
77.09  
76.84  
71.83  
61.98  
61.87  
34.87  
32.46  
31.53  
30.14  
22.62  
21.42  
19.20

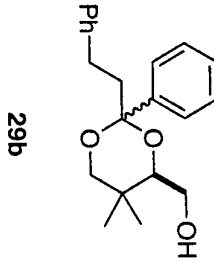

Current Data Parameters  
NAME da-p11-x4  
EXPNO 2  
PROCNO 1

F2 - Acquisition Parameters  
Date\_ 500000  
Time 10.46  
INSTRUM spect  
PROBHD 5 mm TXI 13C  
PULPROG zgpg30  
TD 32768  
SOLVENT CDCl3  
NS 611  
DS 2  
SWH 32679.738 Hz  
FIDRES 0.597306 Hz  
AQ 0.5014004 sec  
RG 32768  
DM 15.300 usec  
DE 6.00 usec  
TE 290.0 K  
D3 0.00100000 sec  
PL12 12.00 dB  
D1 12.00000000 sec  
CPDPRG2 waltz16  
PCPD2 100.00 usec  
SF02 500.1325006 MHz  
NUC2 1H  
PL2 120.00 dB  
P1 8.50 usec  
DE 6.00 usec  
SF04 125.7715724 MHz  
NUC4 13C  
PL4 3.00 dB

F2 - Processing parameters  
SI 8192  
SF 125.757887 MHz  
WDW EM  
SSB 0  
LB 4.00 Hz  
GB 0  
PC 1.00

1D NMR plot parameters  
CX 20.00 cm  
F1P 200.000 ppm  
F1 25151.56 Hz  
F2P 0.000 ppm  
F2 0.00 Hz  
PPMCM 10.00000 ppm/cm  
HZCM 1257.57788 Hz/cm

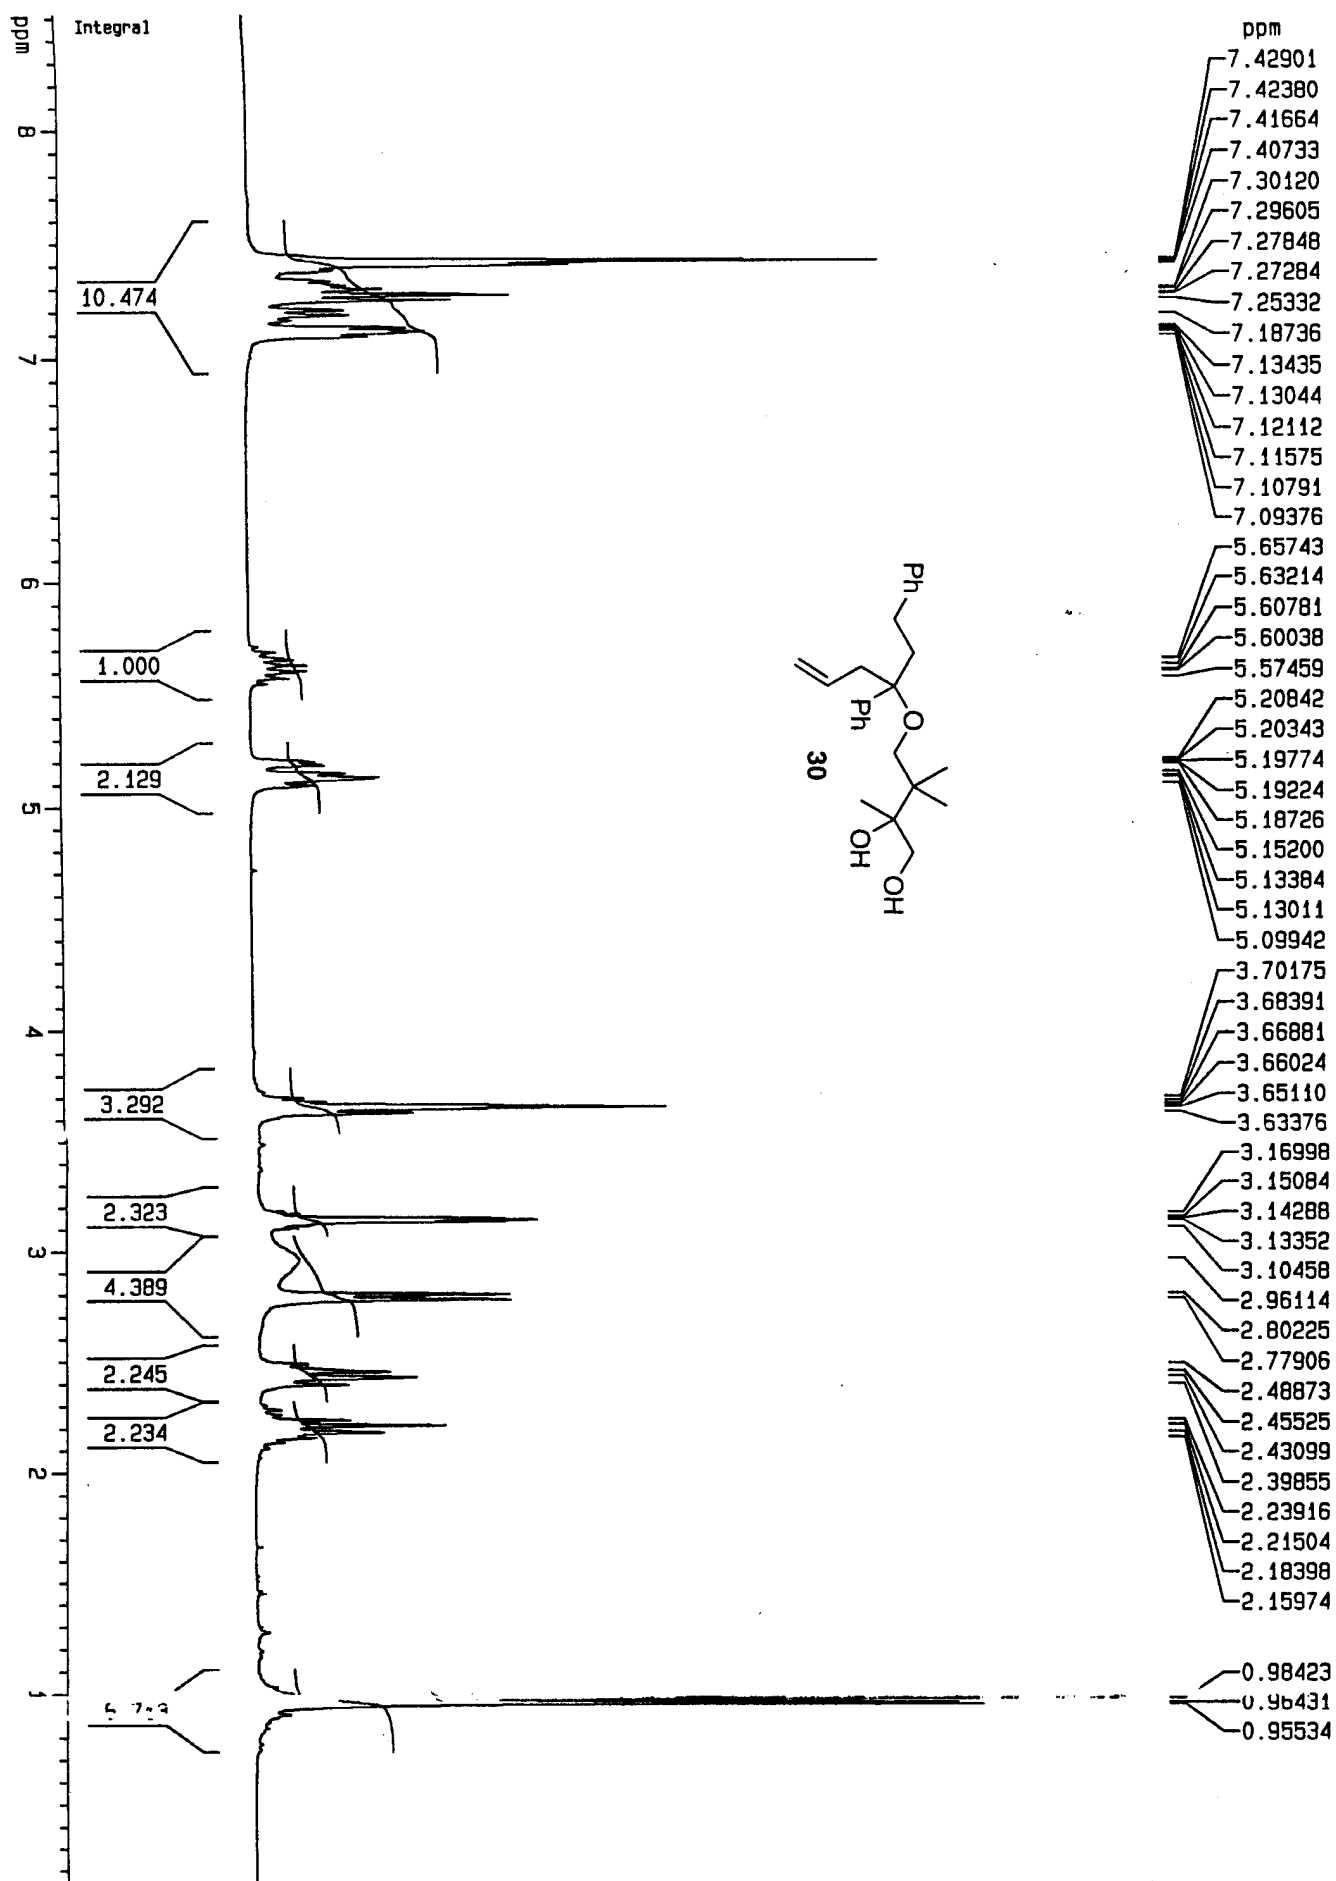

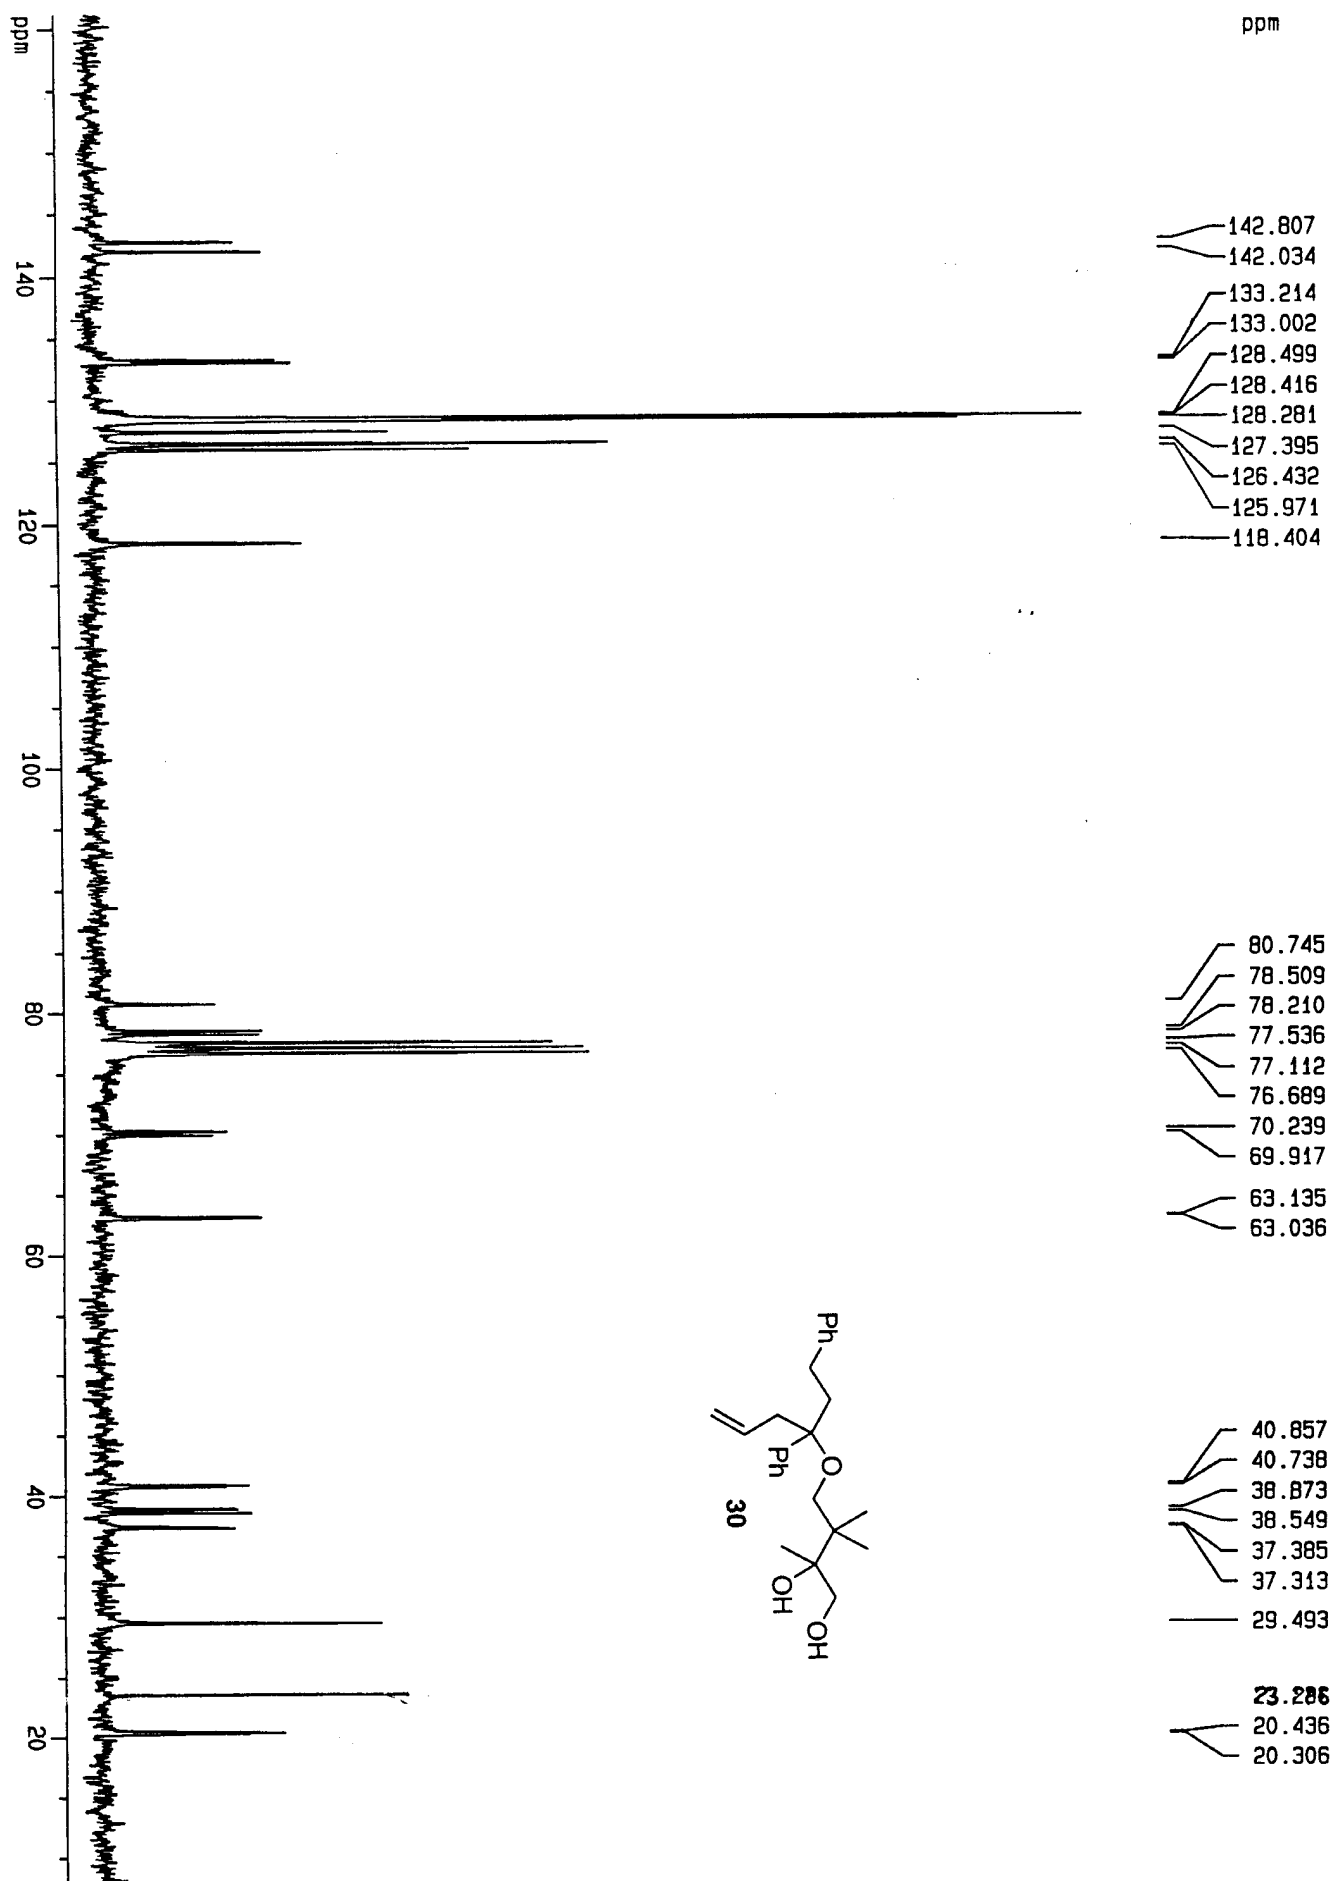



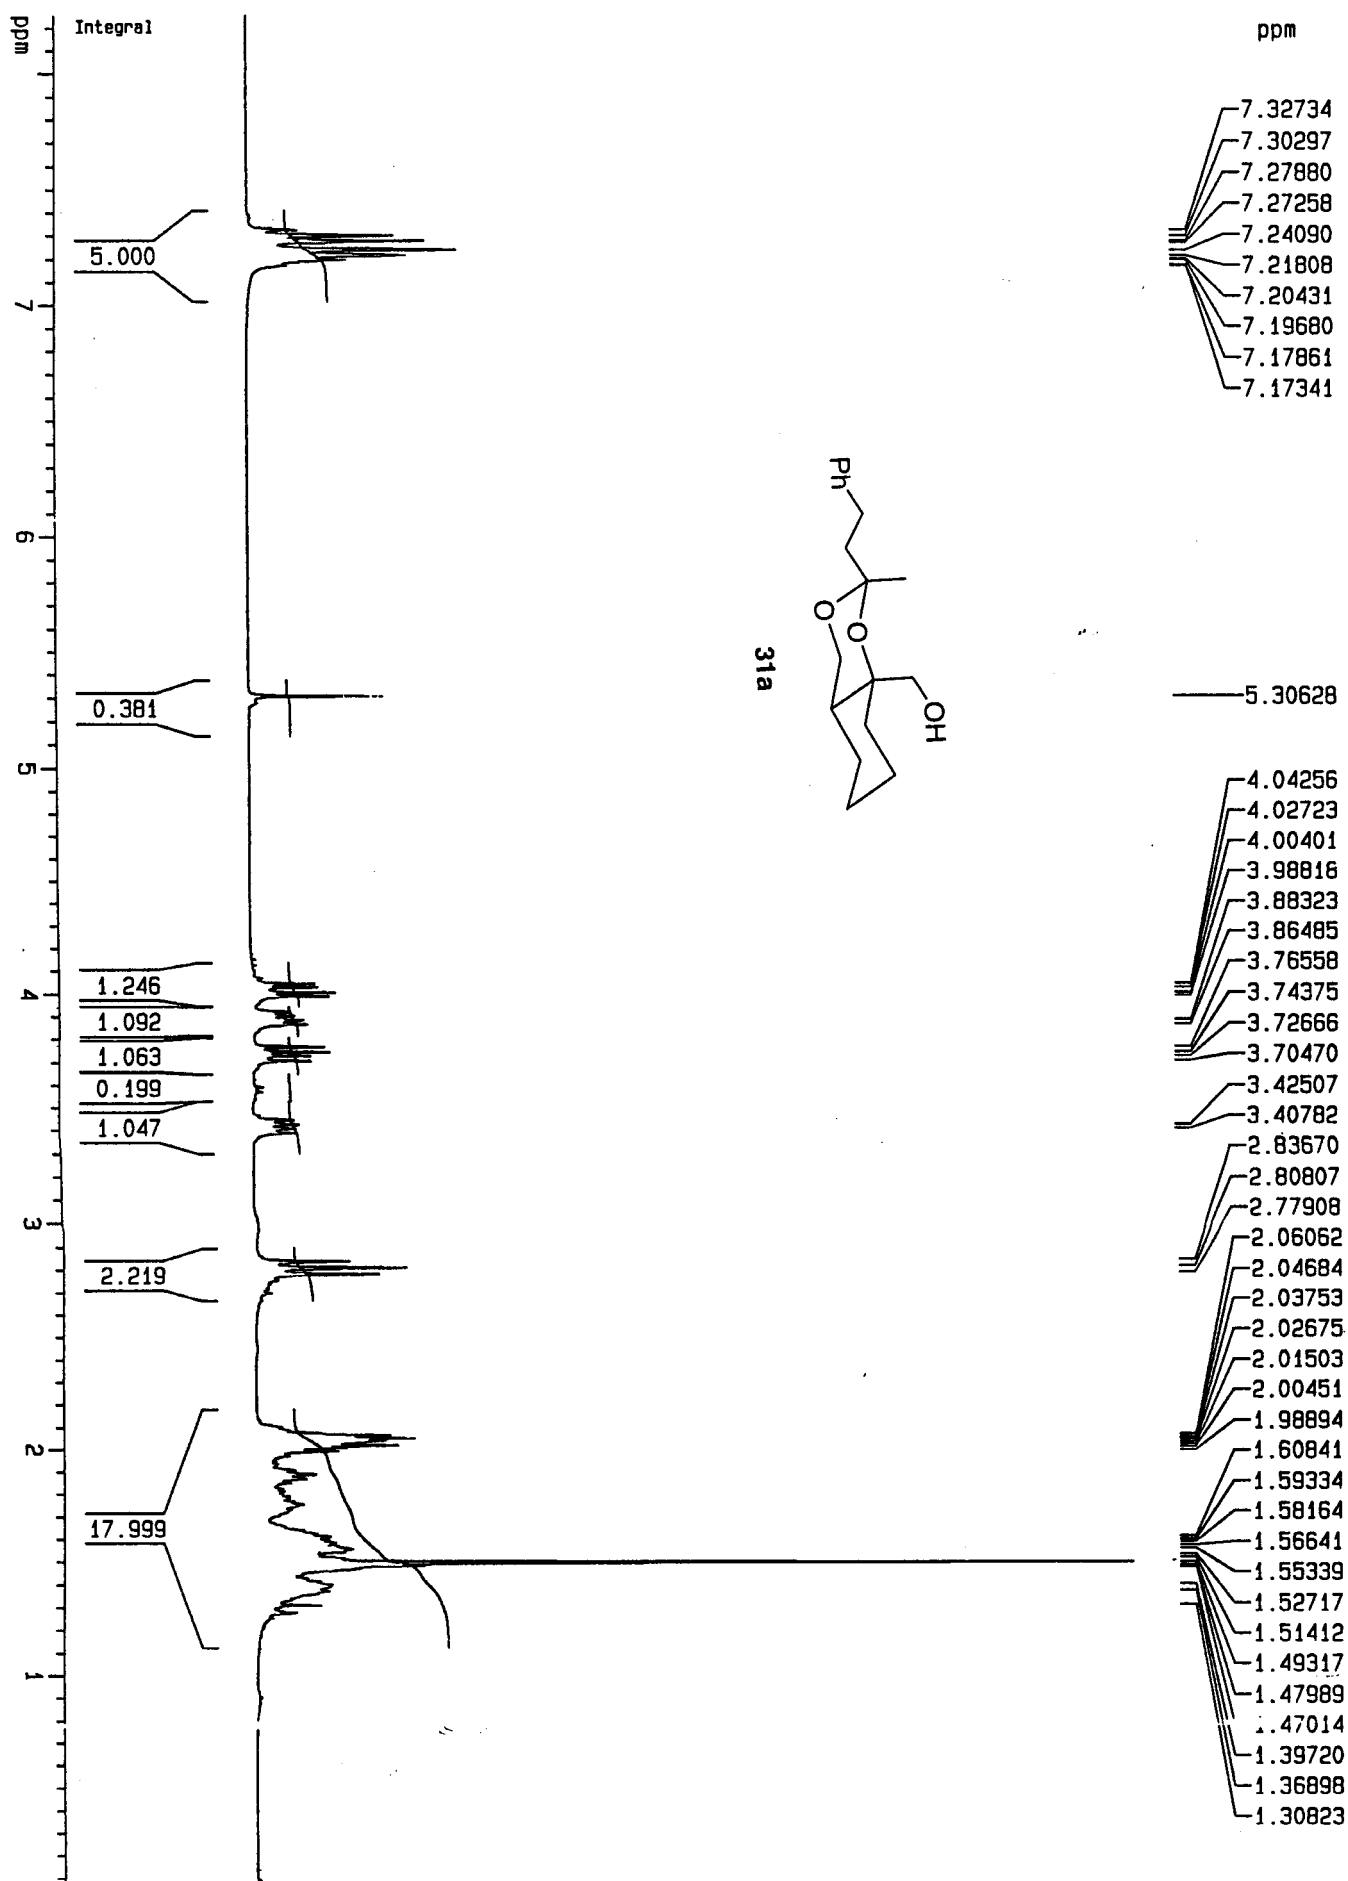

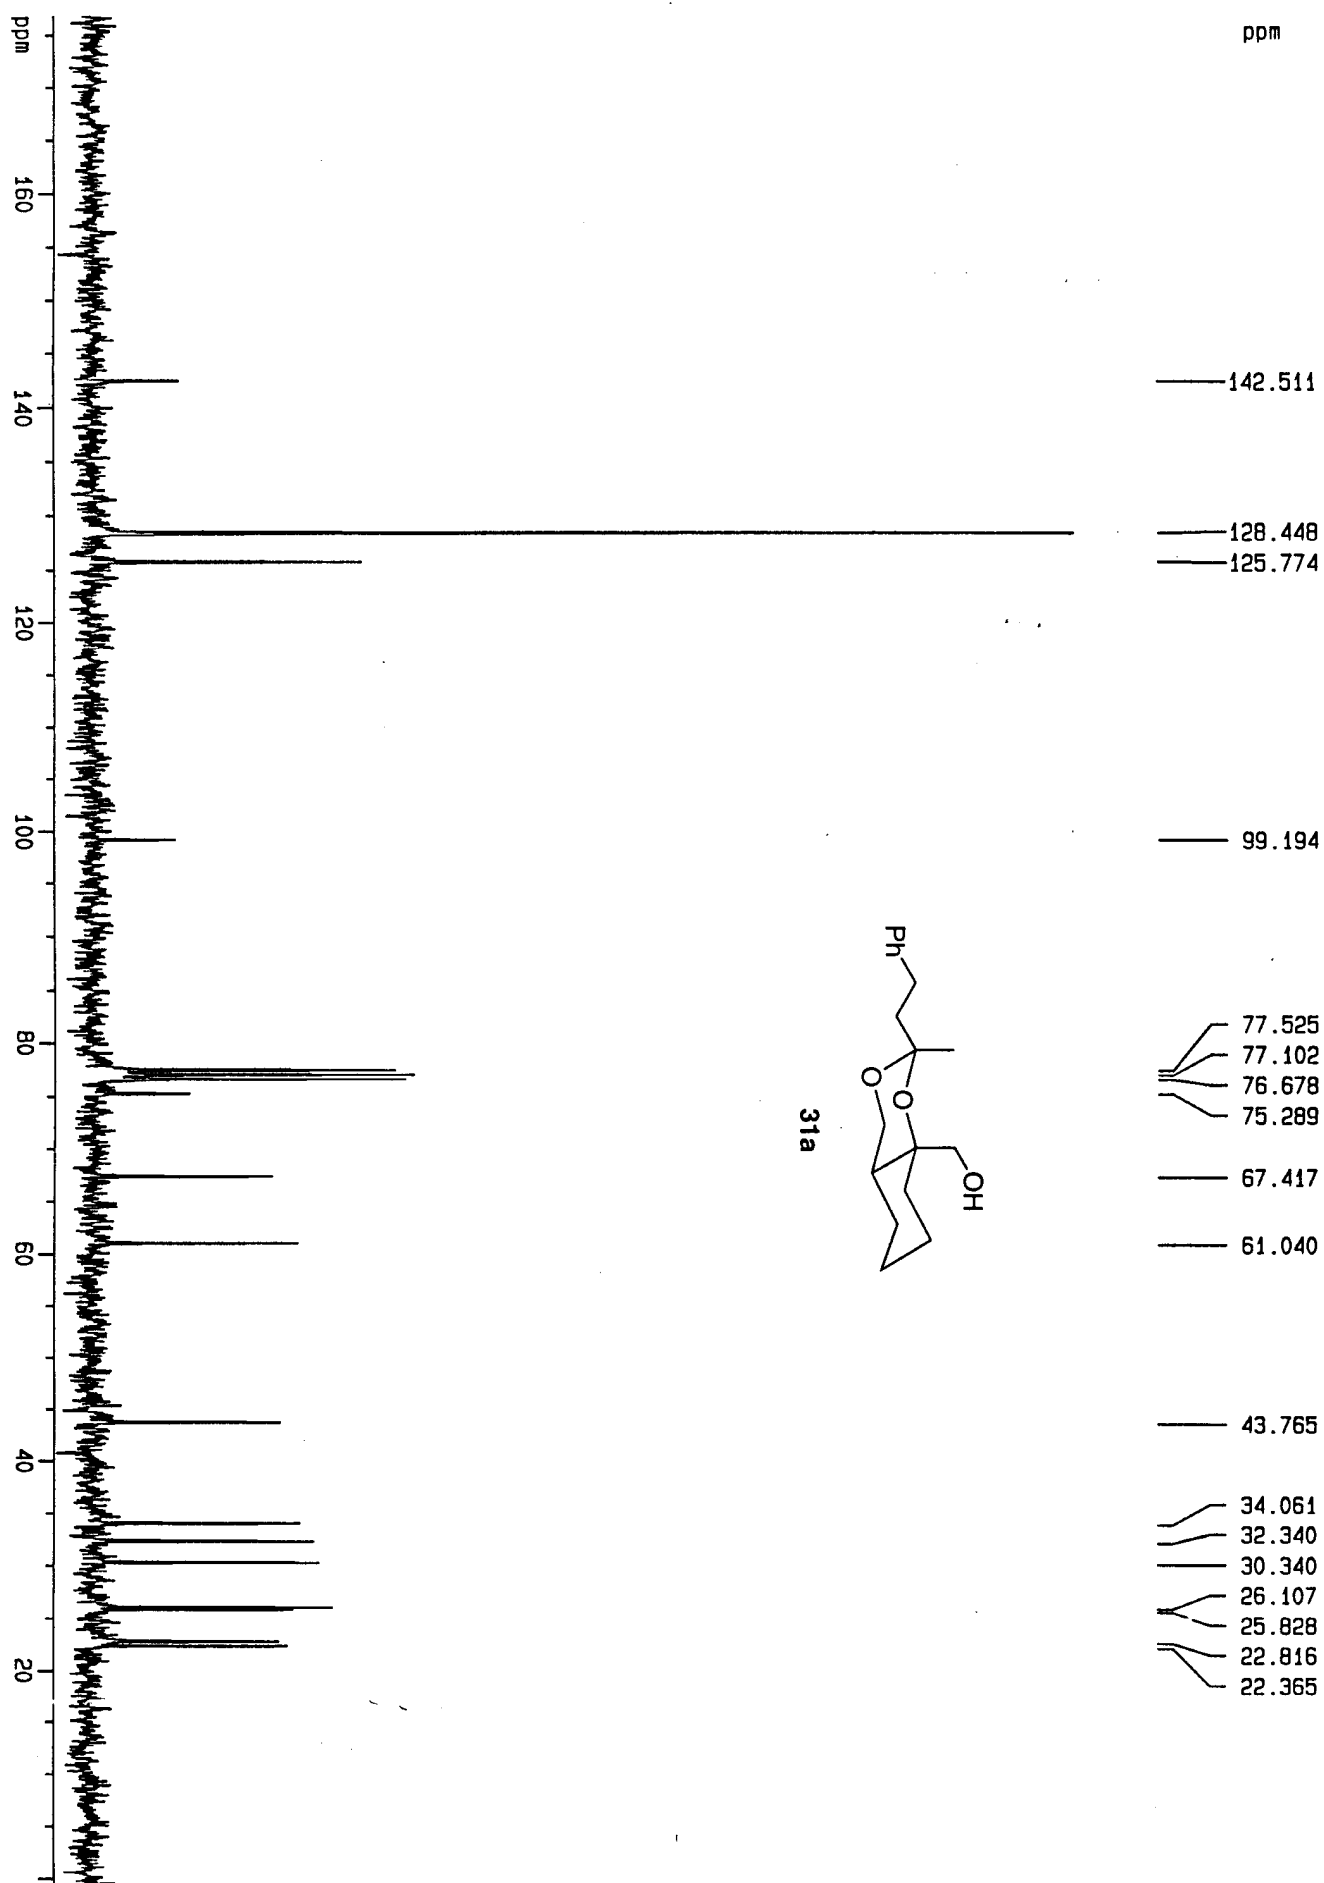

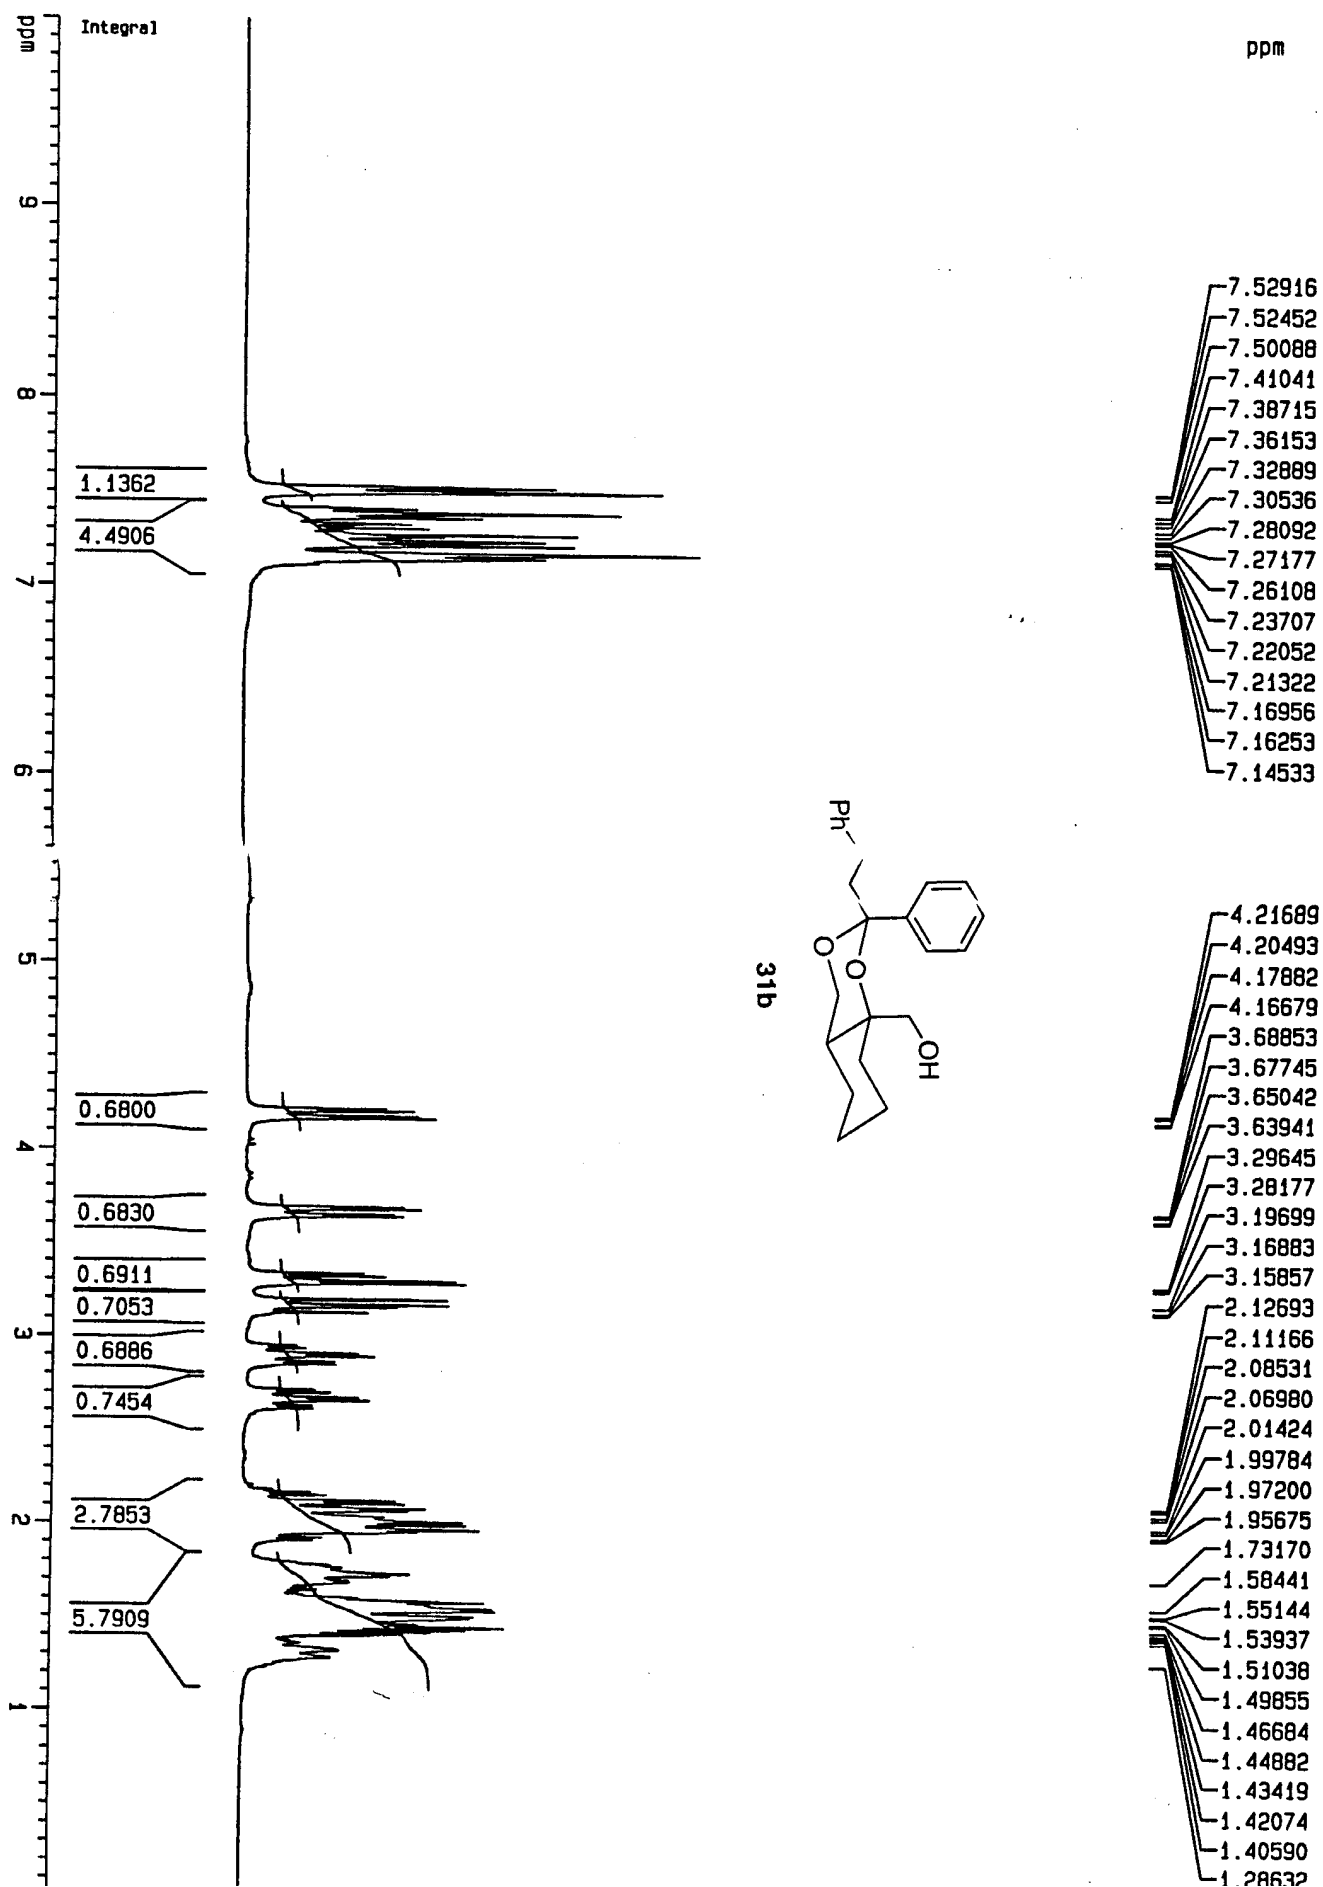

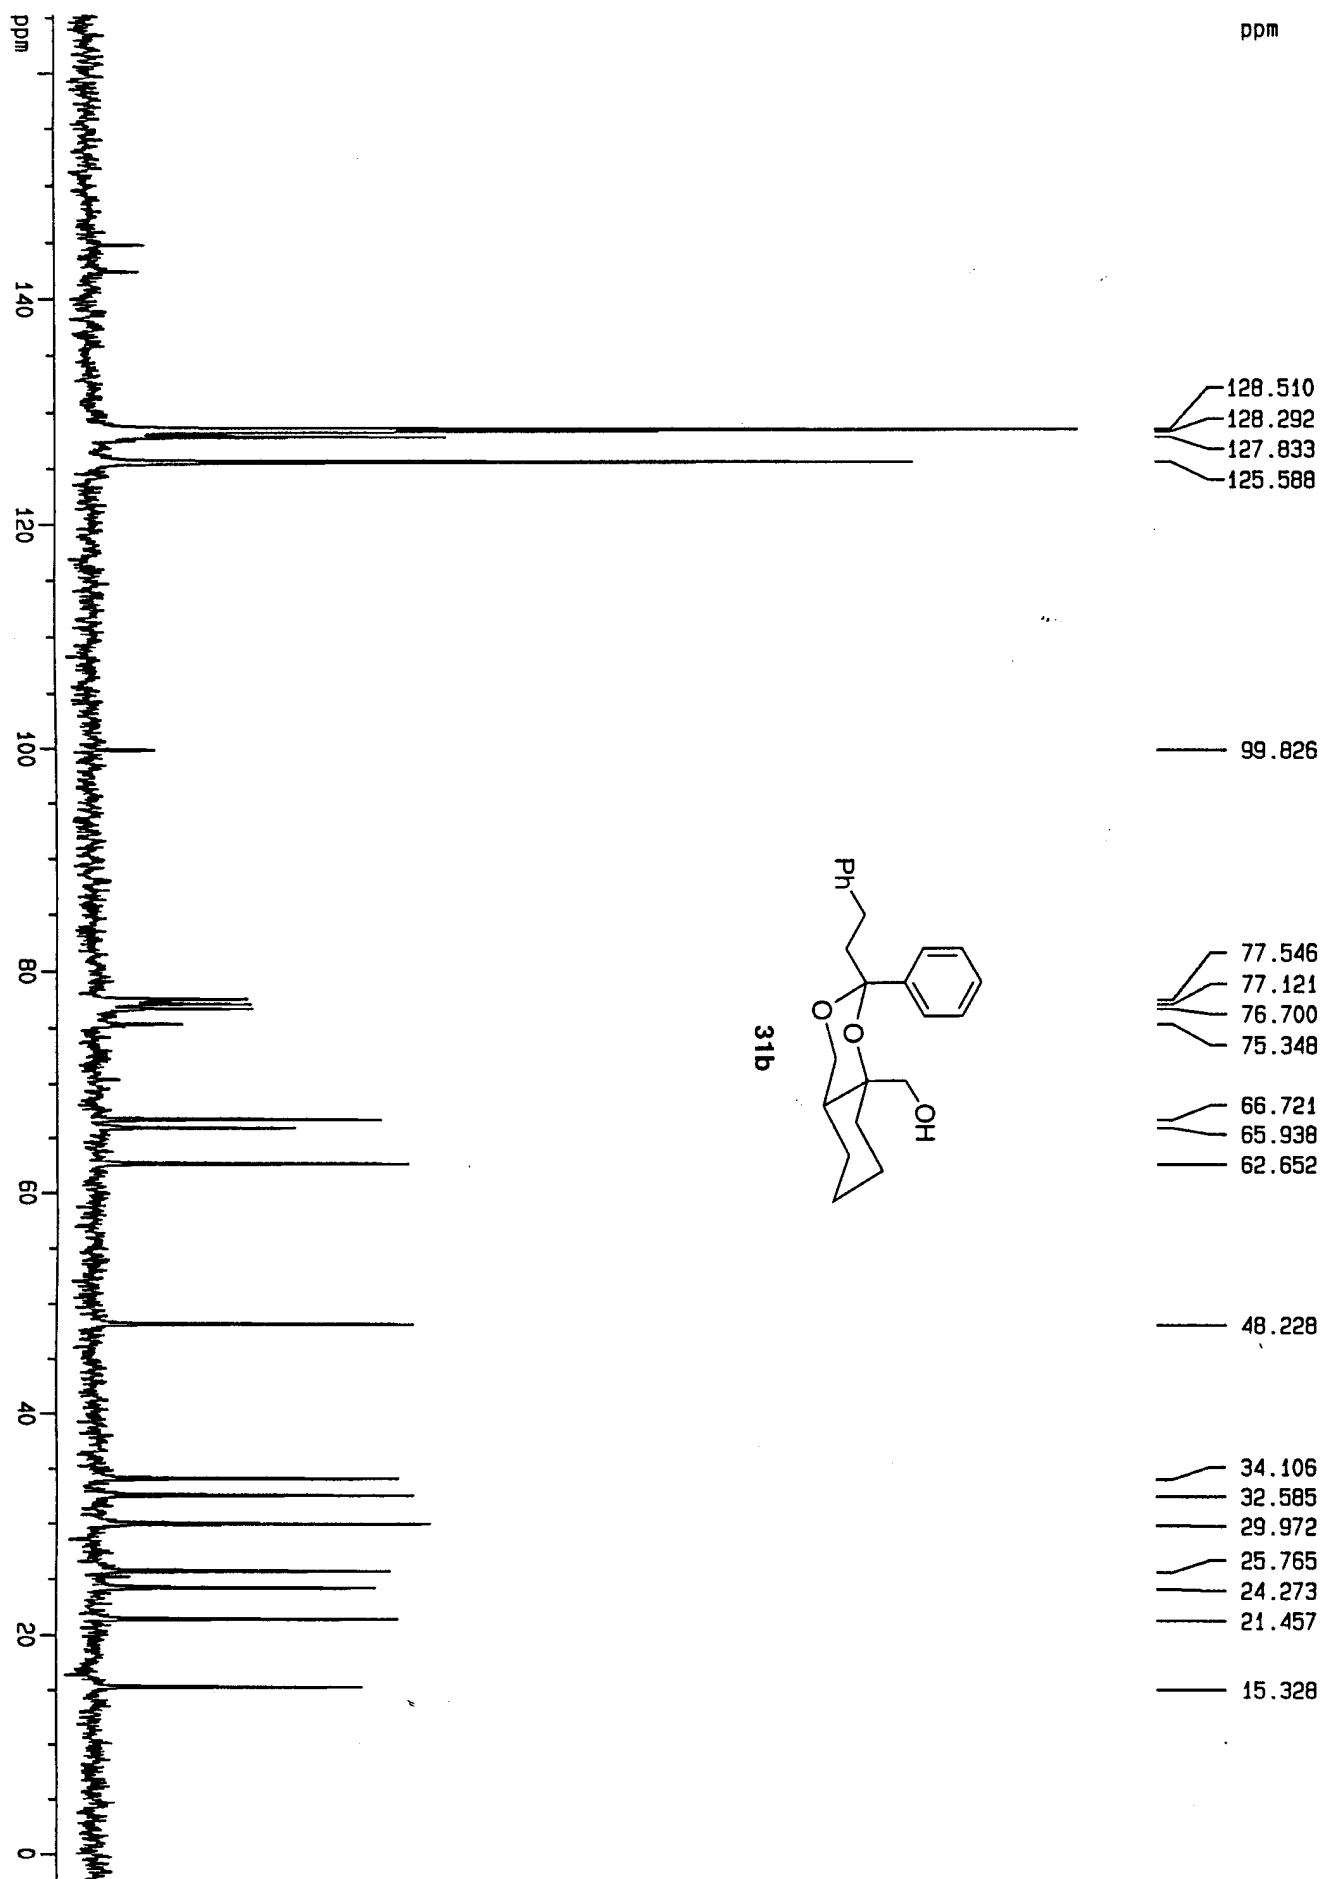

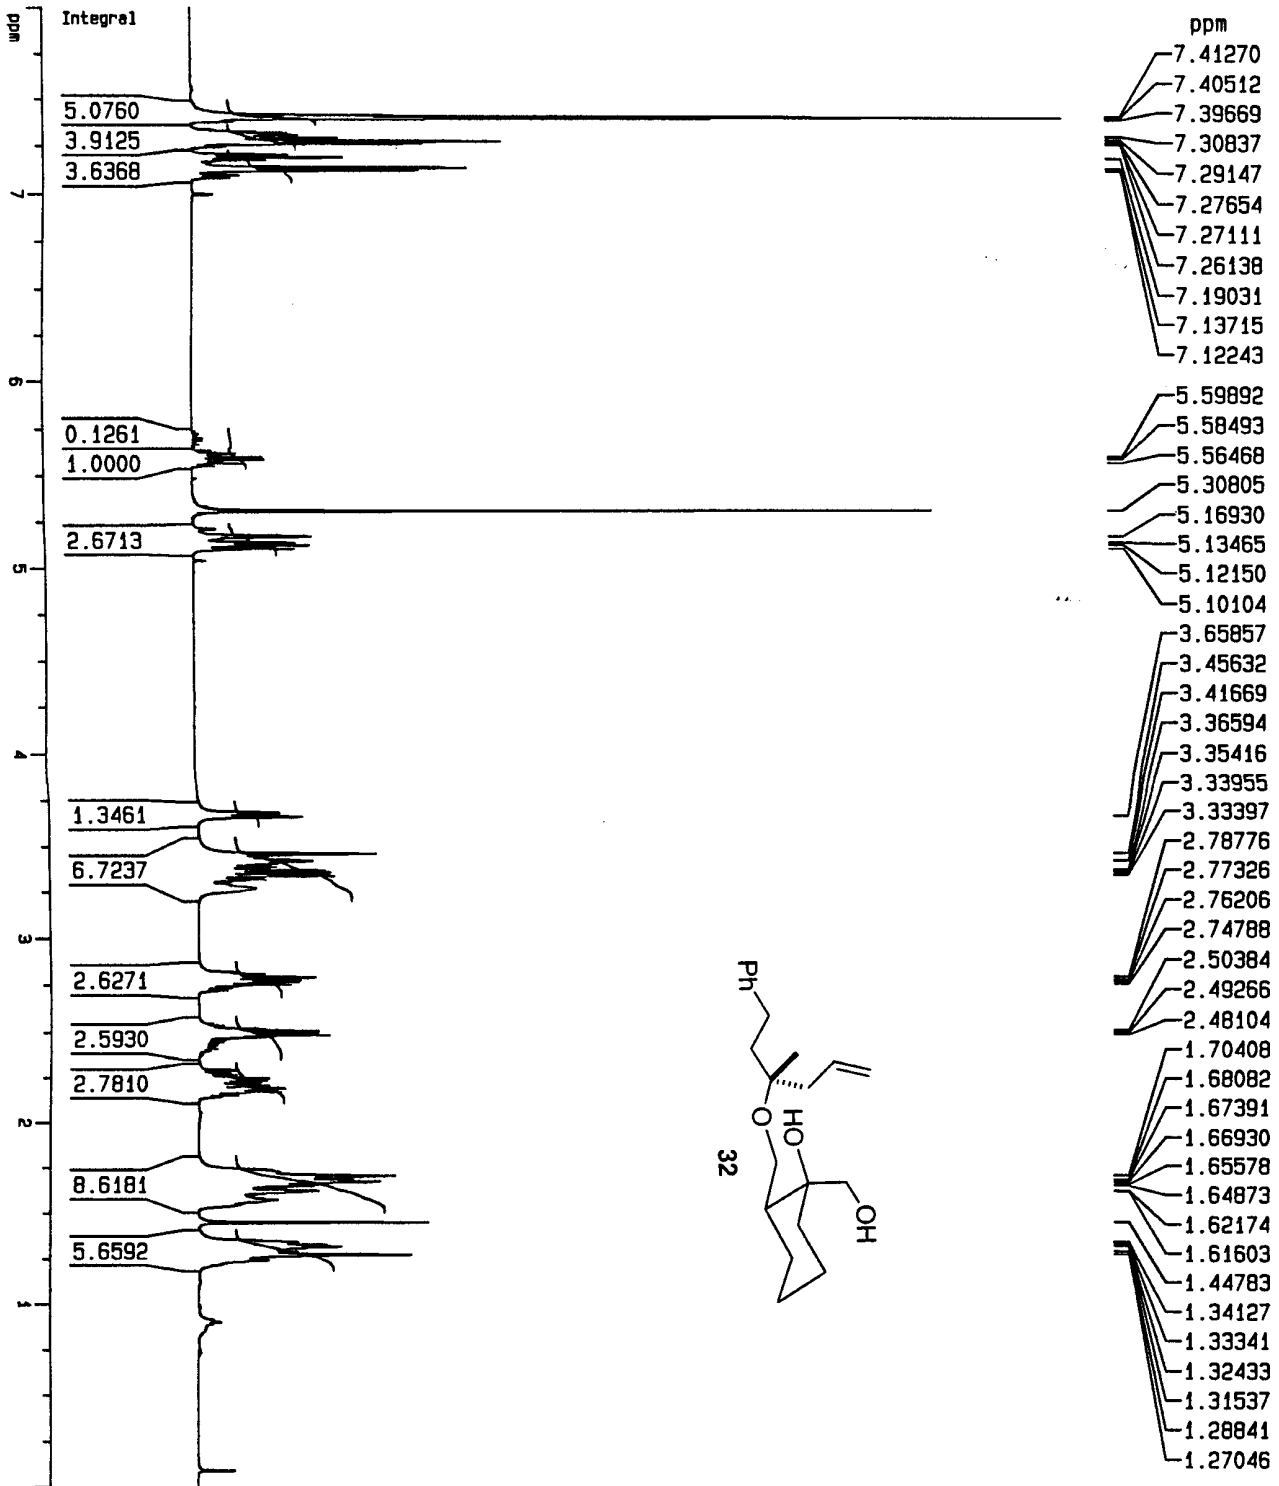

Current Data Parameters

NAME p-142-4m

EXPNO 1

PROCNO 1

F2 - Acquisition Parameters

Date\_ 500000

Time 14.59

INSTRUM spect

PROBHD 5 mm TXI 13C

PULPROG zg

TD 32768

SOLVENT CDCl3

NS 8

DS 0

SWH 7507.507 Hz

FIDRES 0.229111 Hz

AQ 2.1823988 sec

RG 20.2

DW 66.600 usec

DE 6.00 usec

TE 290.0 K

D1 12.0000000 sec

P1 9.00 usec

DE 6.00 usec

SFO1 500.1330008 MHz

NUC1 1H

PL1 0.00 dB

F2 - Processing parameters

SI 16384

SF 500.1300073 MHz

WDW EM

SSB 0

LB 0.40 Hz

GB 0

PC 1.00

1D NMR plot parameters

CX 20.00 cm

F1P 8.000 ppm

F1 4001.04 Hz

F2P 0.000 ppm

F2 0.00 Hz

PPMKM 0.40000 ppm/ci

HZCM 200.05200 Hz/cm

ppm

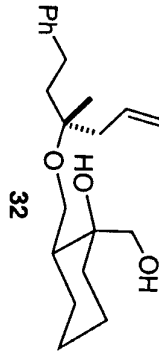

142.66  
141.97  
132.92  
128.51  
128.42  
128.32  
127.49  
126.43  
125.99  
118.50

81.53  
77.35  
77.09  
76.84  
72.64  
70.11  
63.77

53.50  
42.74  
41.28  
38.23  
35.09  
29.57  
26.30  
25.73  
21.42

Current Data Parameters  
NAME d-142-4m  
EXPNO 2  
PROCNO 1

## F2 - Acquisition Parameters

Date\_ 500000  
Time 16.16  
INSTRUM spect  
PROBHD 5 mm TXI 13C  
PULPROG c13monoc  
TD 32768  
SOLVENT CDCl3  
NS 159  
DS 2  
SWH 32679.738 Hz  
FIDRES 0.997306 Hz  
AQ 0.5014004 sec  
RG 32768  
DM 15.300 usec  
DE 6.00 usec  
TE 290.0 K  
D3 0.00100000 sec  
PL12 6.00 dB  
D1 12.00000000 sec  
CPDPRG2 waltz16  
PCPD2 100.00 usec  
SF02 500.1325006 MHz  
NUC2 1H  
PL2 120.00 dB  
P1 12.50 usec  
DE 6.00 usec  
SF01 125.7715724 MHz  
NUC1 13C  
PL1 -6.00 dB

## F2 - Processing parameters

SI 8192  
SF 125.7577847 MHz  
MDM EM  
SSB 0  
LB 4.00 Hz  
GB 0  
PC 1.00

## 1D NMR plot parameters

CX 20.00 cm  
F1P 200.000 ppm  
F1 25151.56 Hz  
F2P 0.000 ppm  
F2 0.00 Hz  
PPMCH 10.00000 ppm/cm  
HZCM 1257.57788 Hz/cm

ppm  
180  
160  
140  
120  
100  
80  
60  
40  
20

ppm

12d

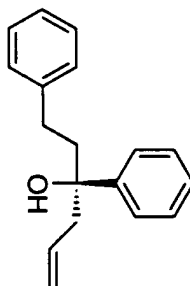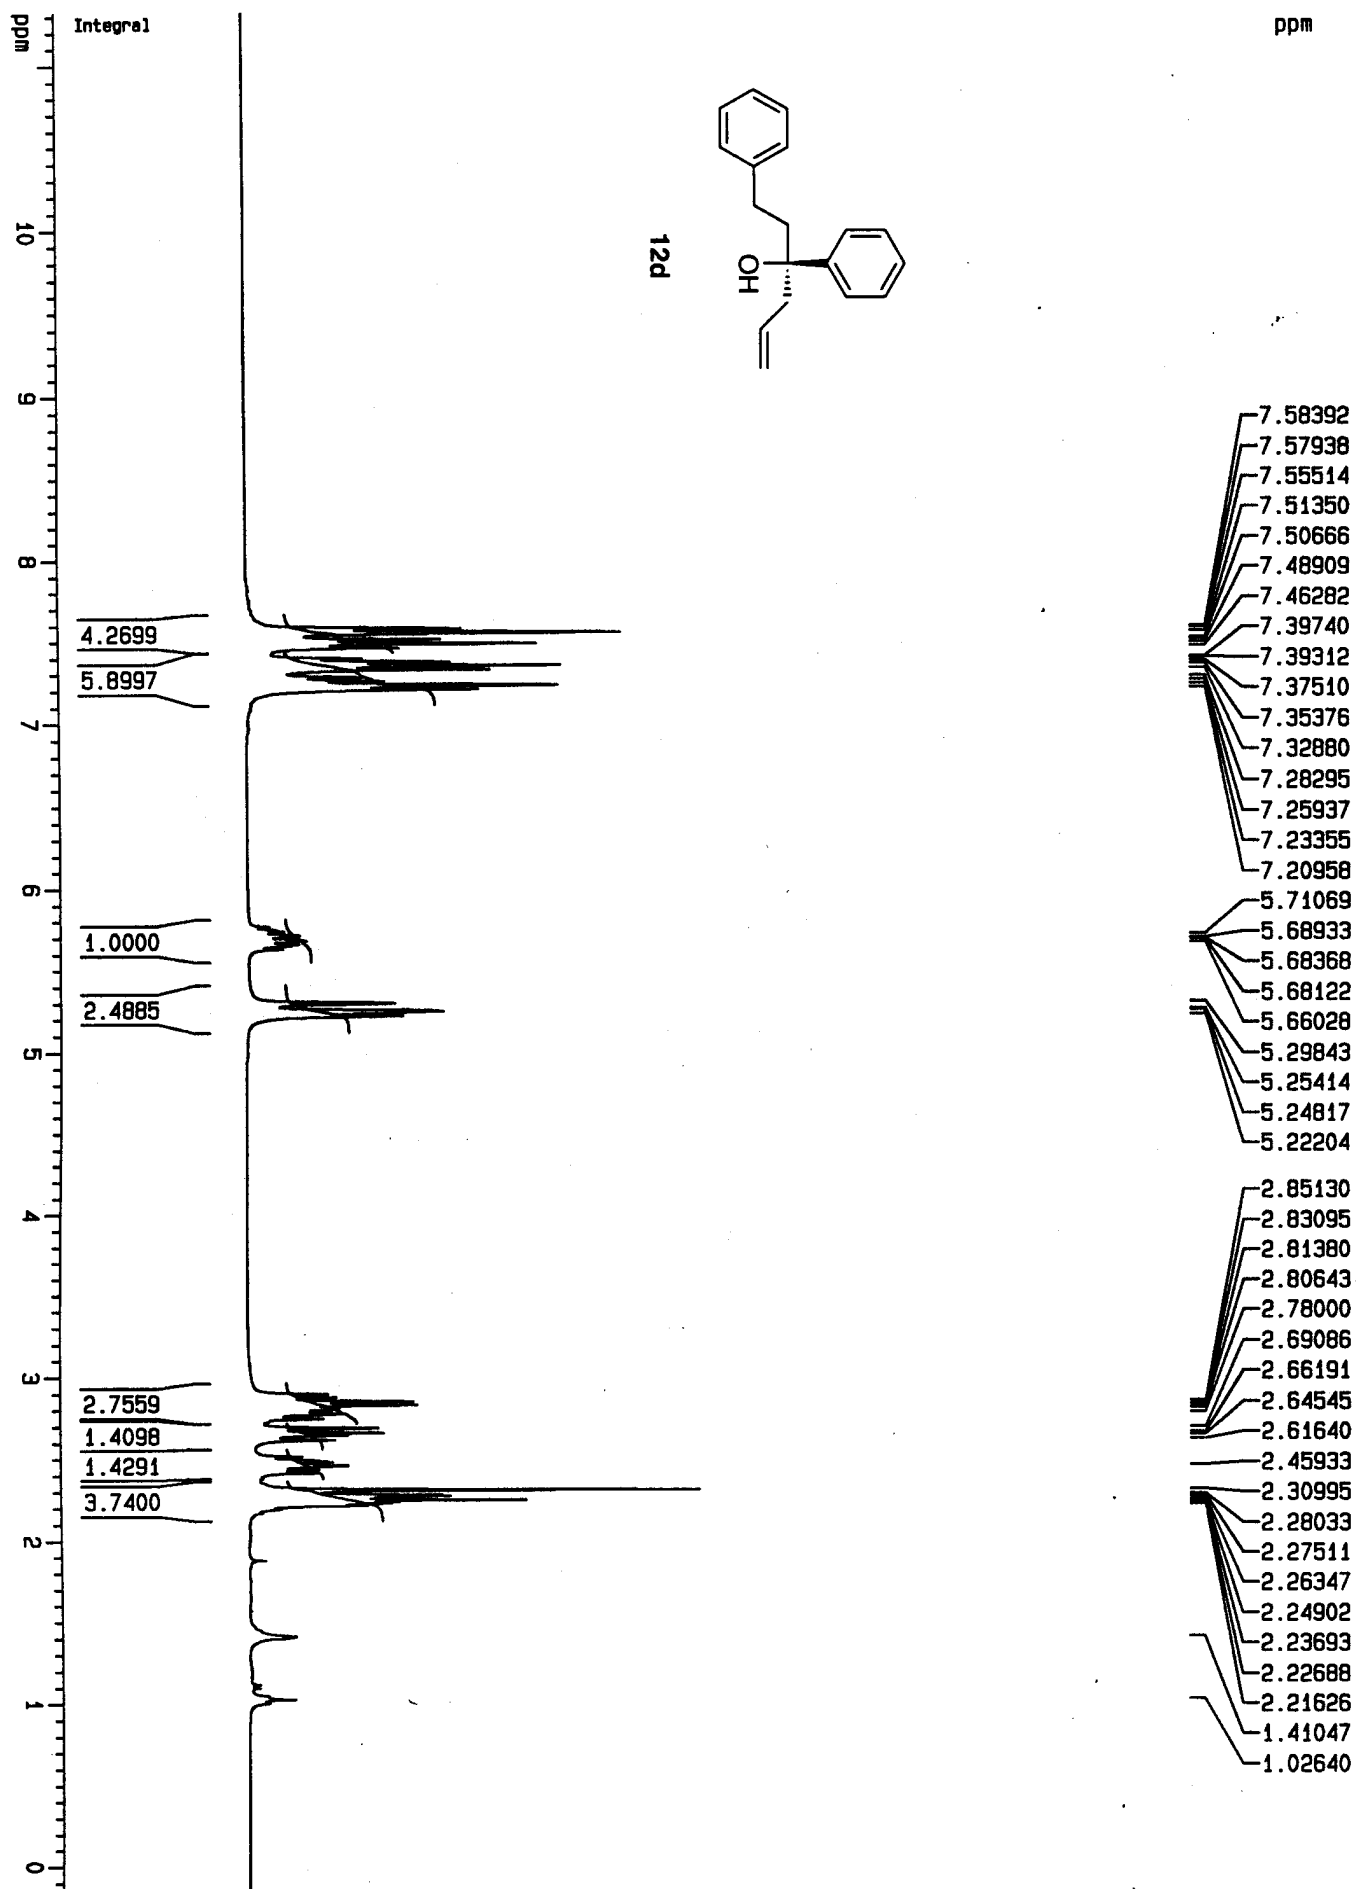

ppm

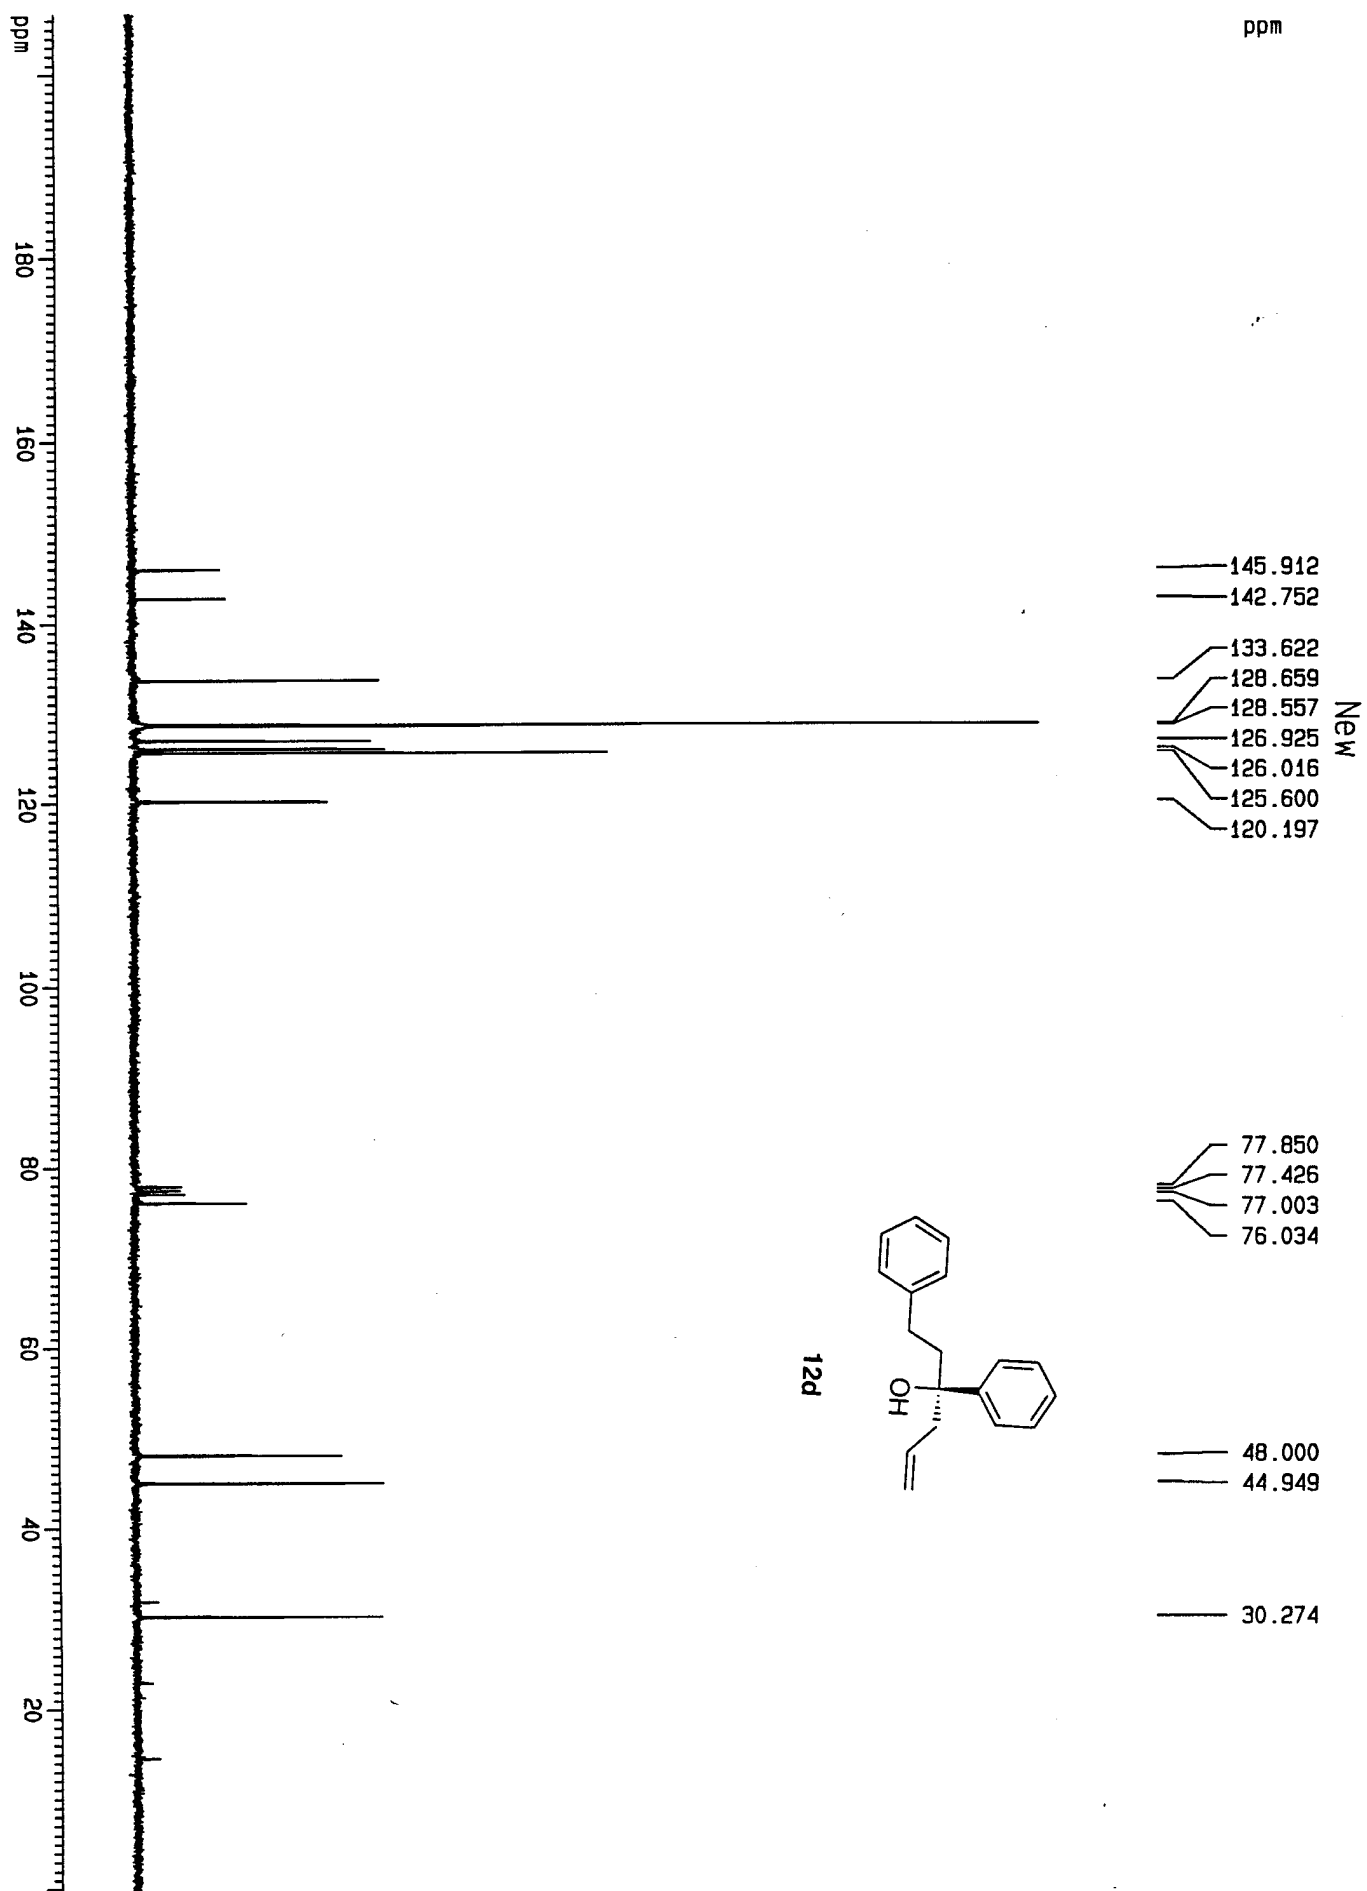

Supplement: Supplementary file 1 [file 5778915]
